# Supplementary material for: Fragment-based design of α-cyanoacrylates and α-cyanoacrylamides targeting Dengue and Zika NS2B/NS3 proteases
Source: Royal Society of Chemistry journal article supplement (doi:10.1039/d2nj01983c), 2022-01-01

## Fragment-based design of $\alpha$ -cyanoacrylates and $\alpha$ -cyanoacrylamides targeting Dengue and Zika NS2B/NS3 proteases

Gabriel Gomes Vilela <sup>a,b,1</sup>, Wadja Feitosa dos Santos Silva <sup>a,b,1</sup>, Vitoria de Melo Batista <sup>b</sup>, Leandro Rocha Silva <sup>a,b</sup>, Hannah Maus <sup>c</sup>, Stefan Josef Hammerschmidt <sup>c</sup>, Clara Andrezza Crisóstomo Bezerra Costa <sup>d</sup>, Orlando Francisco da Silva Moura <sup>d</sup>, Johnnatan Duarte de Freitas <sup>d</sup>, Grazielle Lobo Coelho <sup>e</sup>, Júlia de Andrade Brandão <sup>e</sup>, Leticia Anderson <sup>e,f</sup>, Ênio José Bassi <sup>e</sup>, João Xavier de Araújo-Júnior <sup>b</sup>, Tanja Schirmeister <sup>c</sup>, Edeildo Ferreira da Silva-Júnior <sup>a,b,\*</sup>

<sup>a</sup> Institute of Chemistry and Biotechnology, Federal University of Alagoas, Lourival Melo Mota Avenue, AC. Simões campus, 57072-970, Alagoas, Maceió, Brazil.

<sup>b</sup> Laboratory of Medicinal Chemistry, Post-Graduation Program in Pharmaceutical Sciences, Institute of Pharmaceutical Sciences, Federal University of Alagoas, Lourival Melo Mota Avenue, AC. Simões campus, 57072-970, Alagoas, Maceió, Brazil.

<sup>c</sup> Institute of Pharmaceutical and Biomedical Sciences, Johannes Gutenberg-University, Staudingerweg 5, 55128 Mainz, Germany.

<sup>d</sup> Department of Chemistry, Federal Institute of Alagoas, Maceió campus, Mizaél Domingues Street, 57020-600, Alagoas, Maceió, Brazil.

<sup>e</sup> Immunoregulation Research Group, Laboratory of Research in Virology and Immunology, Institute of Biological and Health Sciences, Lourival Melo Mota Avenue, AC. Simões campus, 57072-970, Alagoas, Maceió, Brazil.

<sup>f</sup> CESMAC University Center, 57051-160, Alagoas, Maceió, Brazil.

\* Corresponding author: Silva-Júnior, E.F.; email: [edeildo.junior@iqb.ufal.br](mailto:edeildo.junior@iqb.ufal.br); Tel.: +55-82-9-9610-8311

<sup>1</sup> Authors contributed equally.

### SUPPLEMENTARY MATERIAL

**Figure 1S. FASTA sequence for NS3 protease from DENV-3 (PDB:2) used as template.**

```
>2FOM_1|Chain A|polyprotein|Dengue virus 2 (11060)
GSHMLEADLELERAADVRWEEQAEISGSSPILSITISEDGSMSEIKNEEEE
QTLGGGGSGGGG
>2FOM_2|Chain B|polyprotein|Dengue virus 2 (11060)
AGVLWDVPSPPVVGKAELEDGAYRIKQKGILGYSQIGAGVYKEGTFHTMW
HVTRGAVLMHKGKRIEPSWADVKKDLISYGGGWKLEGEWKEGEEVQVLAL
EPGKNPRAVQTKPGLFKTNTGTIGAVSLDFSPGTSGPSPIVDKKGKVVGLY
GNGVVTRSGAYVSAIANTEKSIEDNPEIEDDIFRK
```

Figure 2S. Results from the alignment performed by using the Basic Local Alignment Search Tool (BLAST, <https://blast.ncbi.nlm.nih.gov/Blast.cgi>).

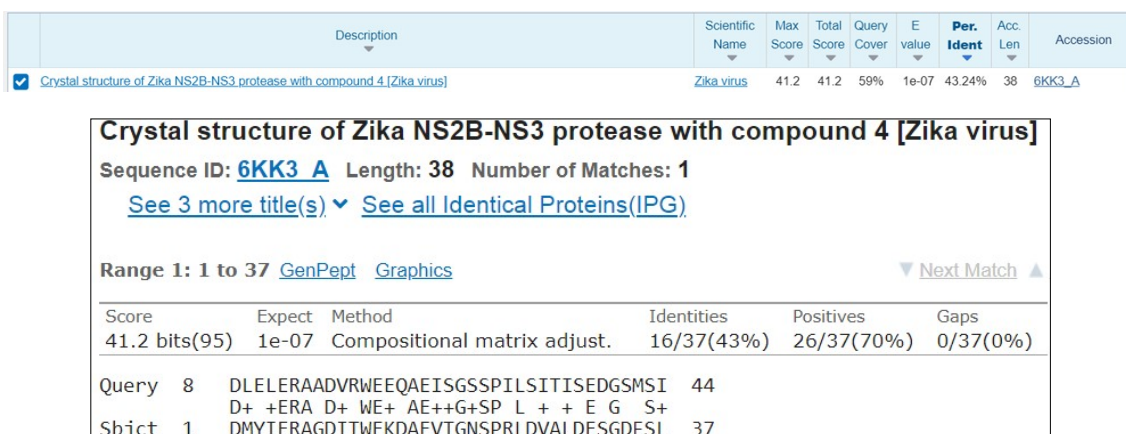

Figure 3S. Ramachandran plots for 2M9P NS2B/NS3-LQM467 after 200 ns dynamics simulations.

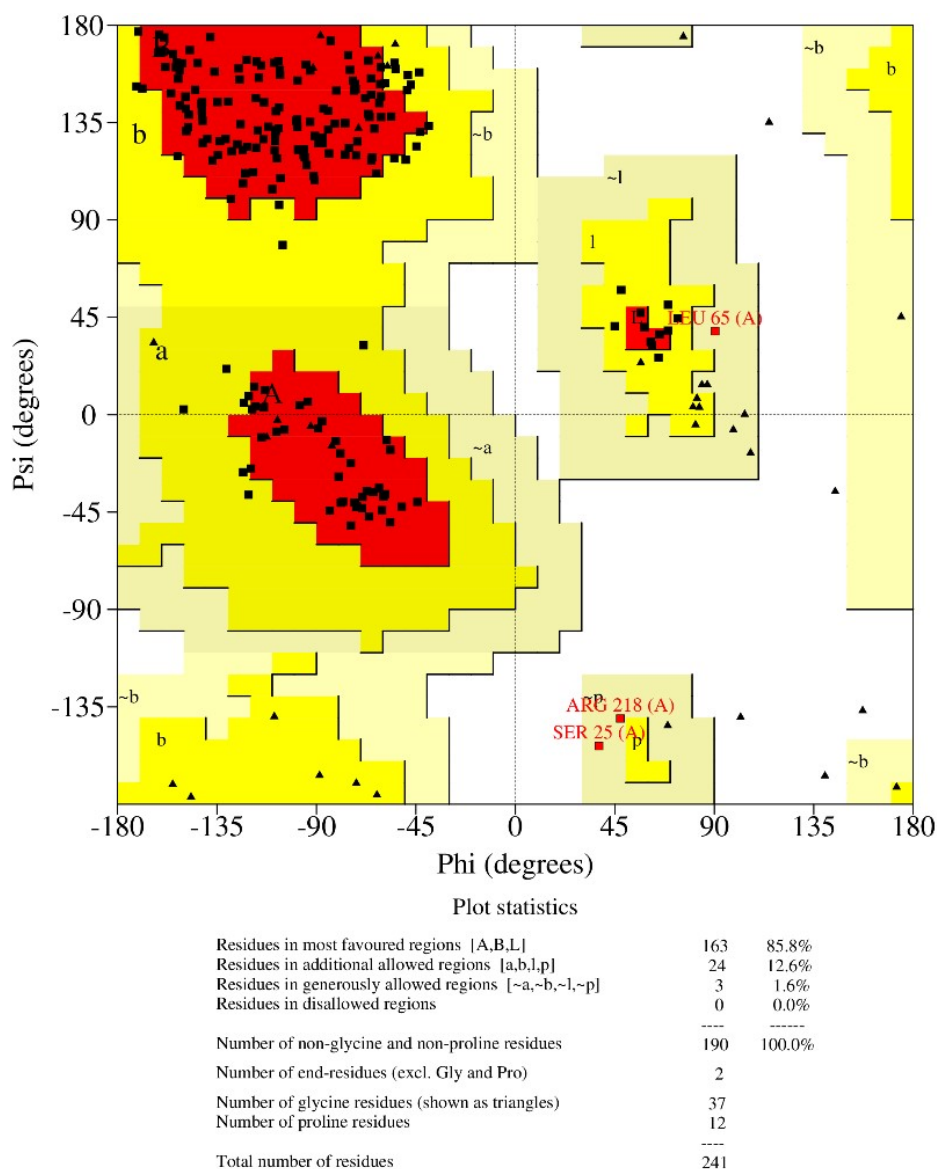

Figure 4S. Ramachandran plots for 2M9P NS2B/NS3-LQM471 after 200 ns dynamics simulations.

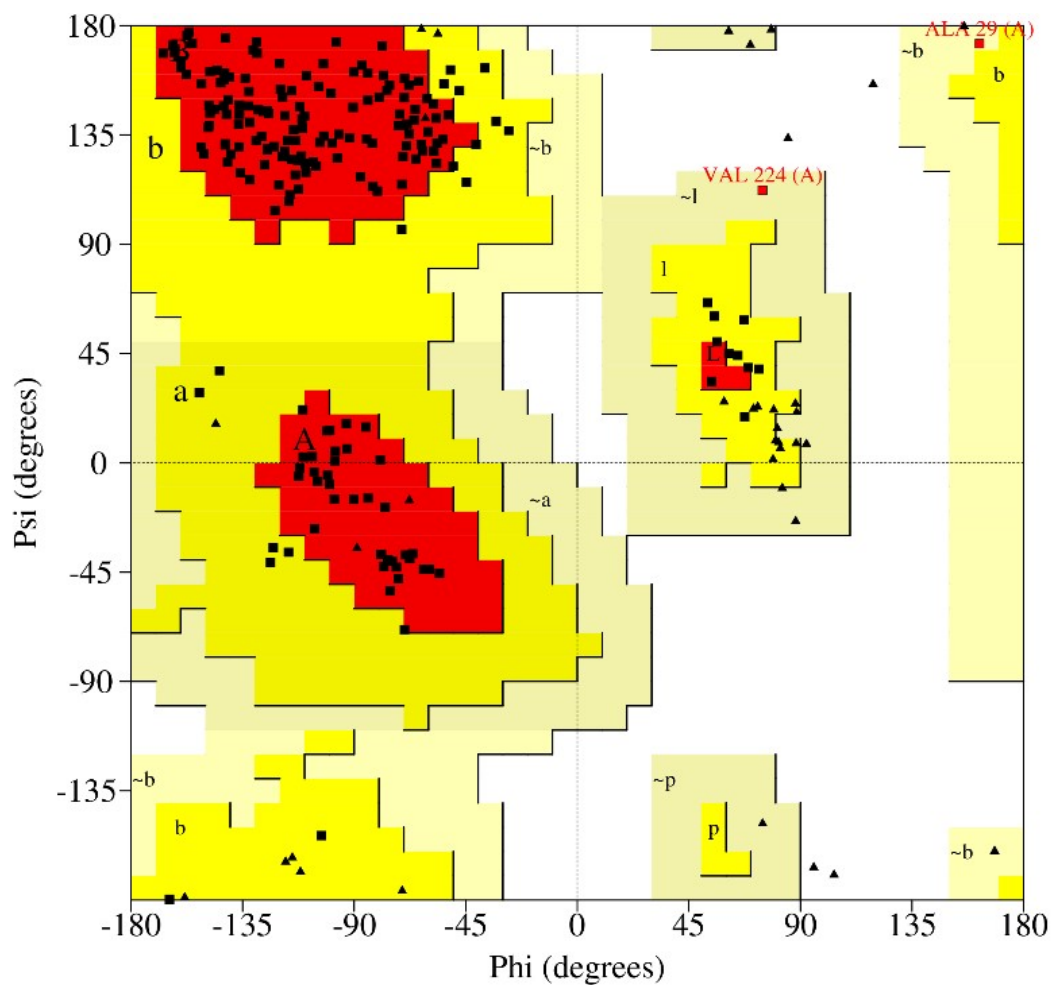

Plot statistics

|                                                      |     |        |
|------------------------------------------------------|-----|--------|
| Residues in most favoured regions [A,B,L]            | 167 | 87.9%  |
| Residues in additional allowed regions [a,b,l,p]     | 21  | 11.1%  |
| Residues in generously allowed regions [-a,-b,-l,-p] | 2   | 1.1%   |
| Residues in disallowed regions                       | 0   | 0.0%   |
| -----                                                |     |        |
| Number of non-glycine and non-proline residues       | 190 | 100.0% |
| Number of end-residues (excl. Gly and Pro)           | 2   |        |
| Number of glycine residues (shown as triangles)      | 37  |        |
| Number of proline residues                           | 12  |        |
| -----                                                |     |        |
| Total number of residues                             | 241 |        |

Figure 5S. Ramachandran plots for 2M9P NS2B/NS3-LQM472 after 200 ns dynamics simulations.

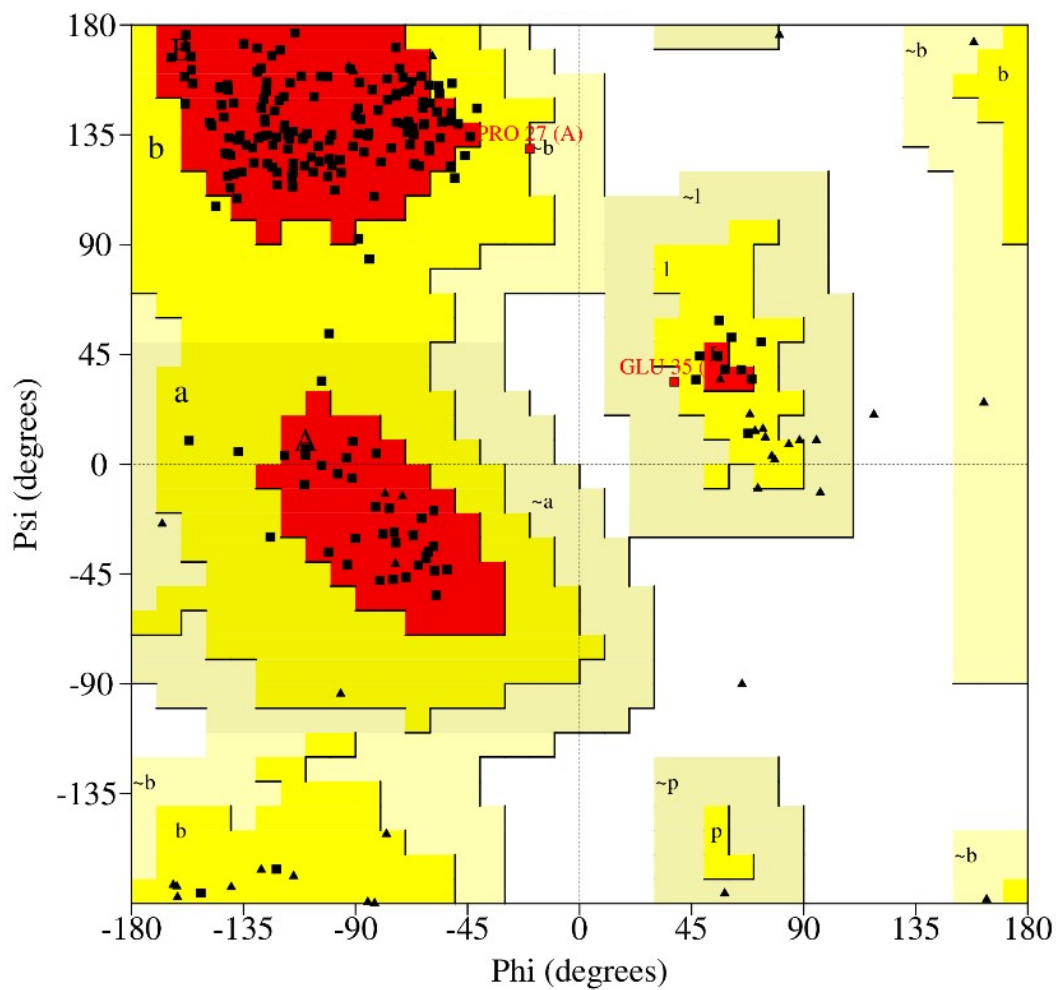

Plot statistics

|                                                      |     |        |
|------------------------------------------------------|-----|--------|
| Residues in most favoured regions [A,B,L]            | 169 | 88.9%  |
| Residues in additional allowed regions [a,b,l,p]     | 20  | 10.5%  |
| Residues in generously allowed regions [~a,~b,~l,~p] | 1   | 0.5%   |
| Residues in disallowed regions                       | 0   | 0.0%   |
| -----                                                |     |        |
| Number of non-glycine and non-proline residues       | 190 | 100.0% |
| Number of end-residues (excl. Gly and Pro)           | 2   |        |
| Number of glycine residues (shown as triangles)      | 37  |        |
| Number of proline residues                           | 12  |        |
| -----                                                |     |        |
| Total number of residues                             | 241 |        |

Figure 6S. Ramachandran plots for 2M9P NS2B/NS3-LQM474 after 200 ns dynamics simulations.

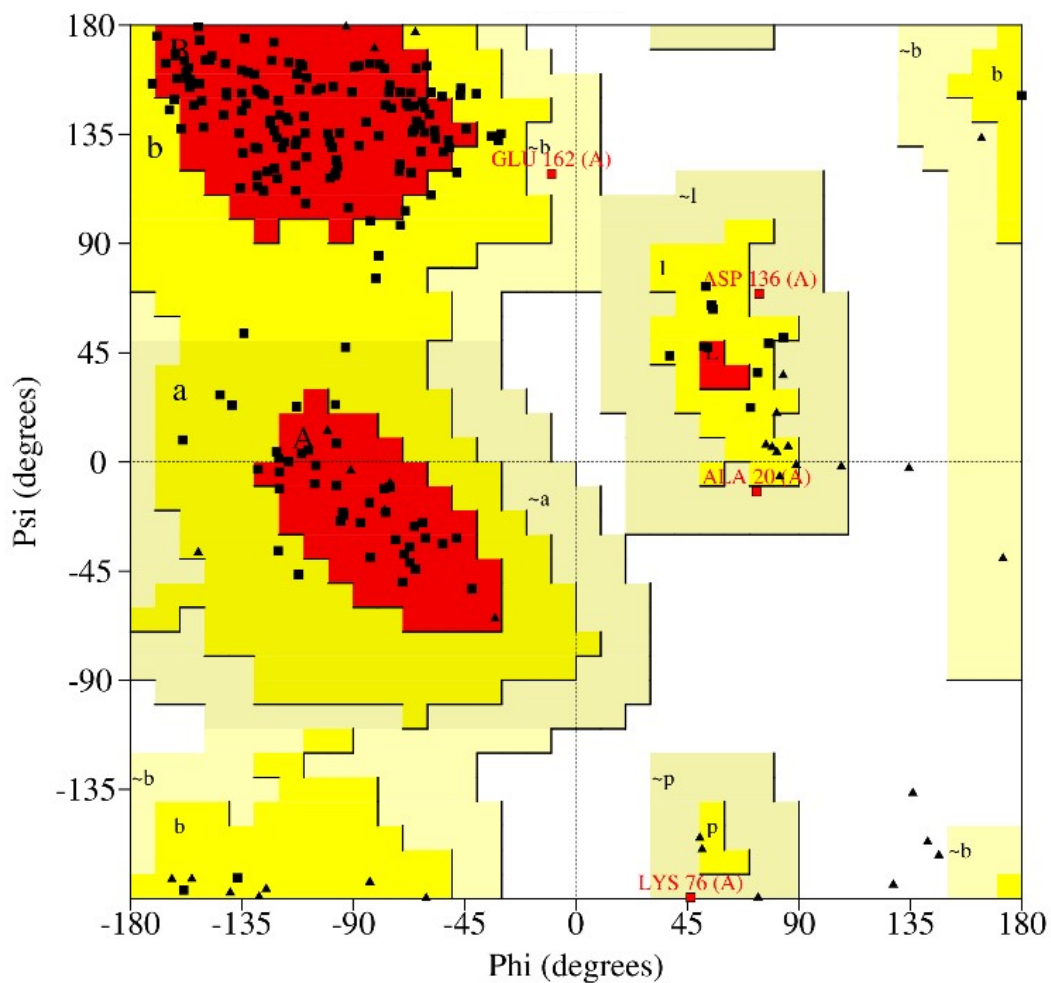

Plot statistics

|                                                      |     |        |
|------------------------------------------------------|-----|--------|
| Residues in most favoured regions [A,B,L]            | 152 | 80.0%  |
| Residues in additional allowed regions [a,b,l,p]     | 34  | 17.9%  |
| Residues in generously allowed regions [-a,-b,-l,-p] | 4   | 2.1%   |
| Residues in disallowed regions                       | 0   | 0.0%   |
| -----                                                |     |        |
| Number of non-glycine and non-proline residues       | 190 | 100.0% |
| Number of end-residues (excl. Gly and Pro)           | 2   |        |
| Number of glycine residues (shown as triangles)      | 37  |        |
| Number of proline residues                           | 12  |        |
| -----                                                |     |        |
| Total number of residues                             | 241 |        |

Figure 7S. Solvent-Accessible Surface Area (SASA) plot for LQM467, 471, 472, and 474 in complex with 2M9P NS2B/NS3 protease during 200 ns dynamics simulations.

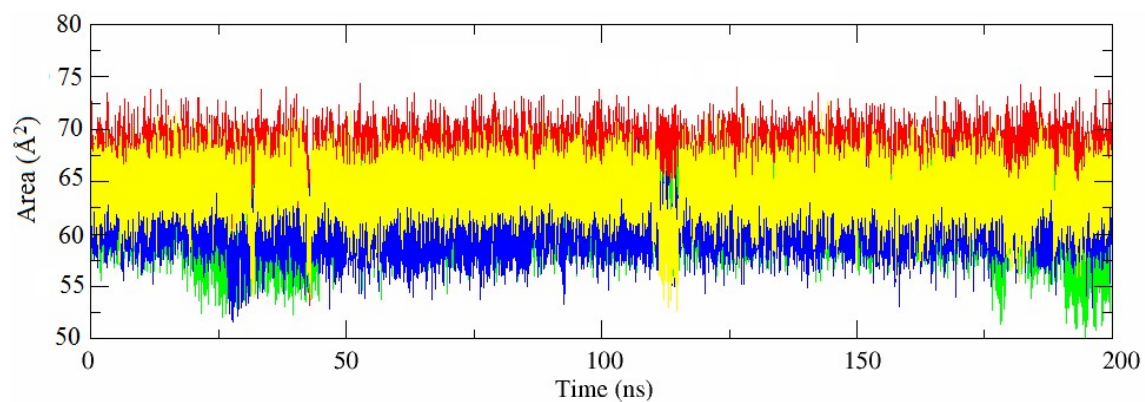

Figure 8S. Radius of Gyration ( $R_g$ ) plot for LQM467, 471, 472, and 474 in complex with 2M9P NS2B/NS3 protease during 200 ns dynamics simulations.

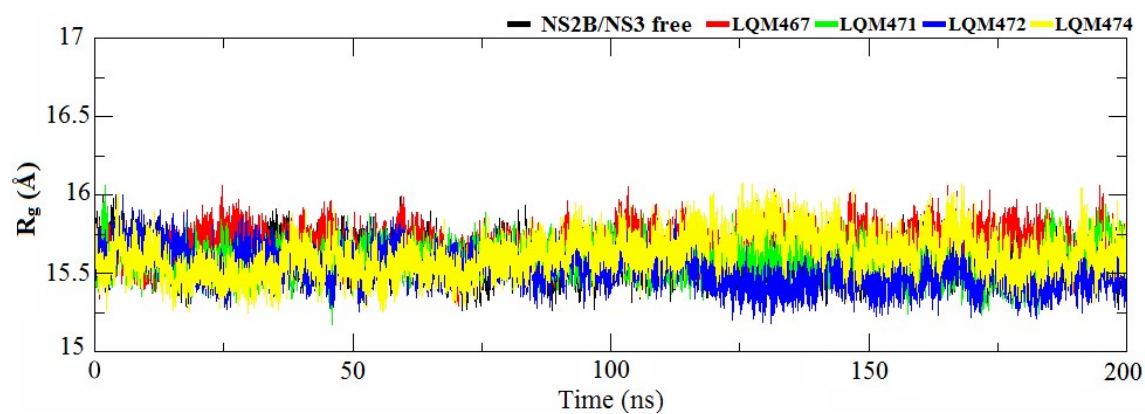

Figure 9S. The qPCR quantification curve of ZIKV viral RNA.

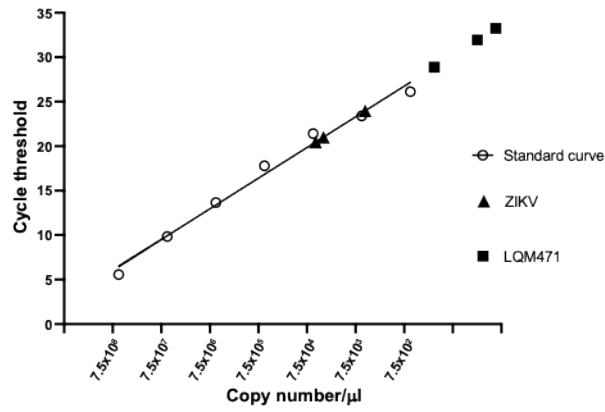

Standard curve of SYBR green-based qPCR amplification with linear regression analysis of seven serial dilutions ranging from  $7.5 \times 10^2$  to  $7.5 \times 10^8$  copies per microliter using a ZIKV genome fragment. The resulting quantification of ZIKV (untreated cells) and LQM471 samples were interpolated using the measured Ct (cycle threshold) and copy number estimated in the qPCR reaction ( $n = 3$  biological replicates). LQM471 treated samples were detected with a Ct below the lowest point of the standard curve ( $< 7.5 \times 10^2$  copies/ $\mu\text{L}$ ), while the ZIKV untreated samples presented a mean value of  $3.9 \times 10^4$  copies/ $\mu\text{L}$  in the qPCR reaction. The efficiency of the qPCR standard curve presented a slope of  $-3.4$  and a coefficient of correlation of  $0.987\%$ .

## CHEMICAL CHARACTERIZATION

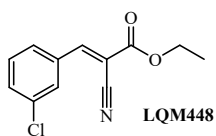

Ethyl (*E*)-3-(3-chlorophenyl)-2-cyanoacrylate  
Chemical Formula:  $C_{12}H_{10}ClNO_2$   
Exact Mass: 235.67 g/mol

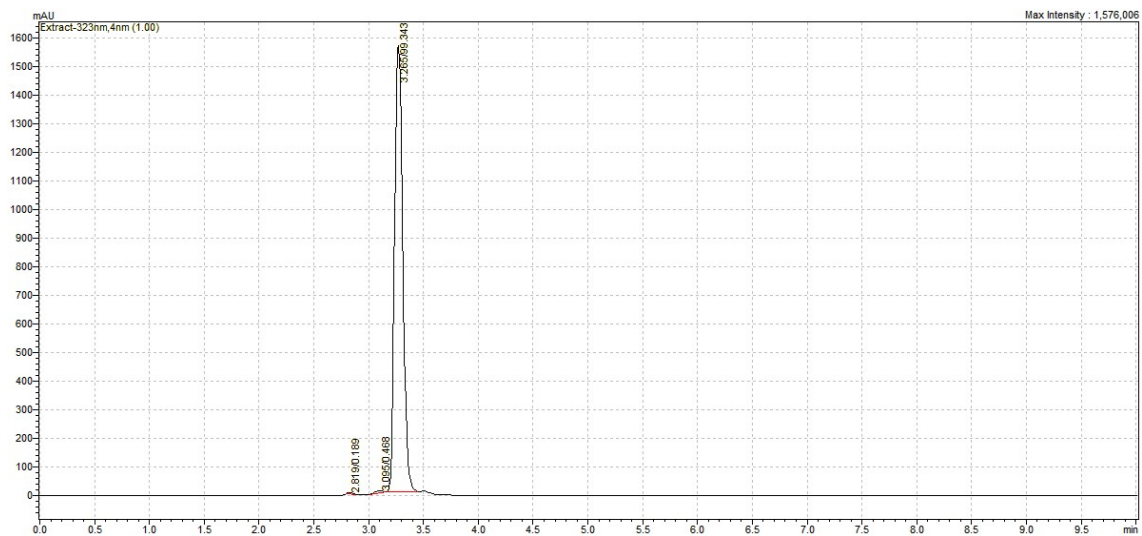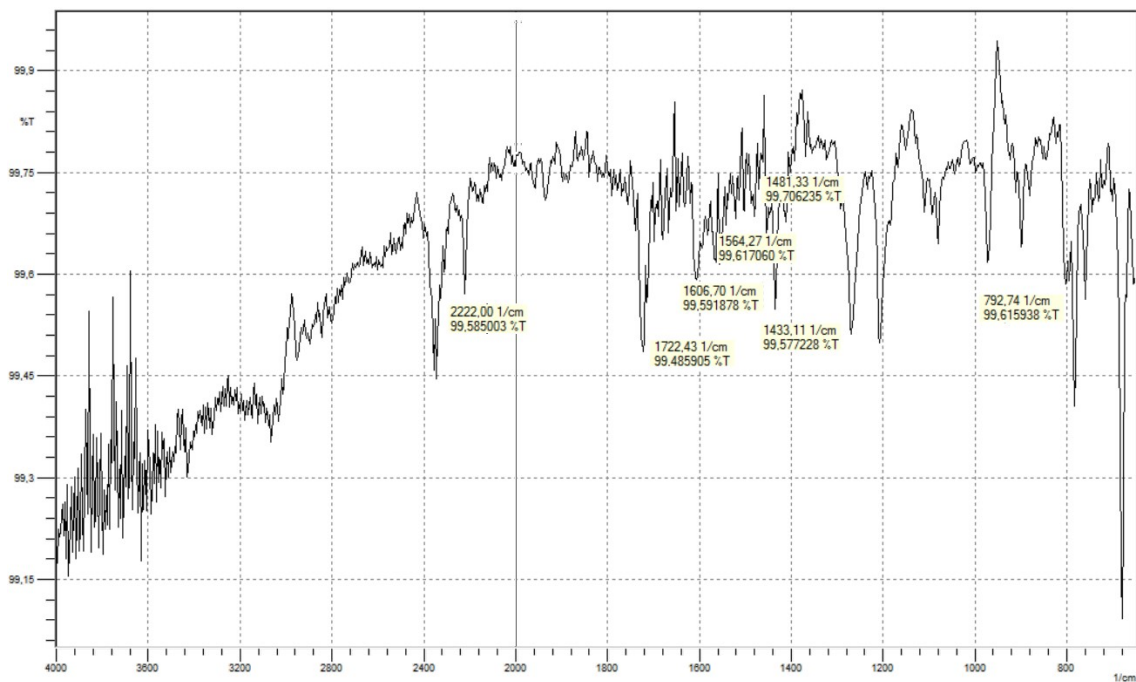



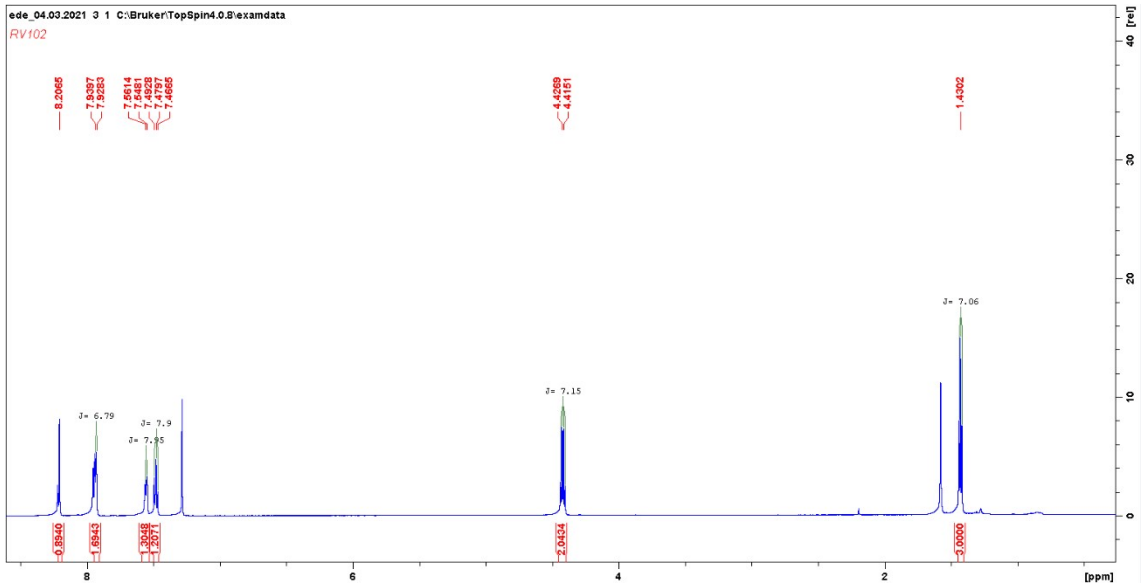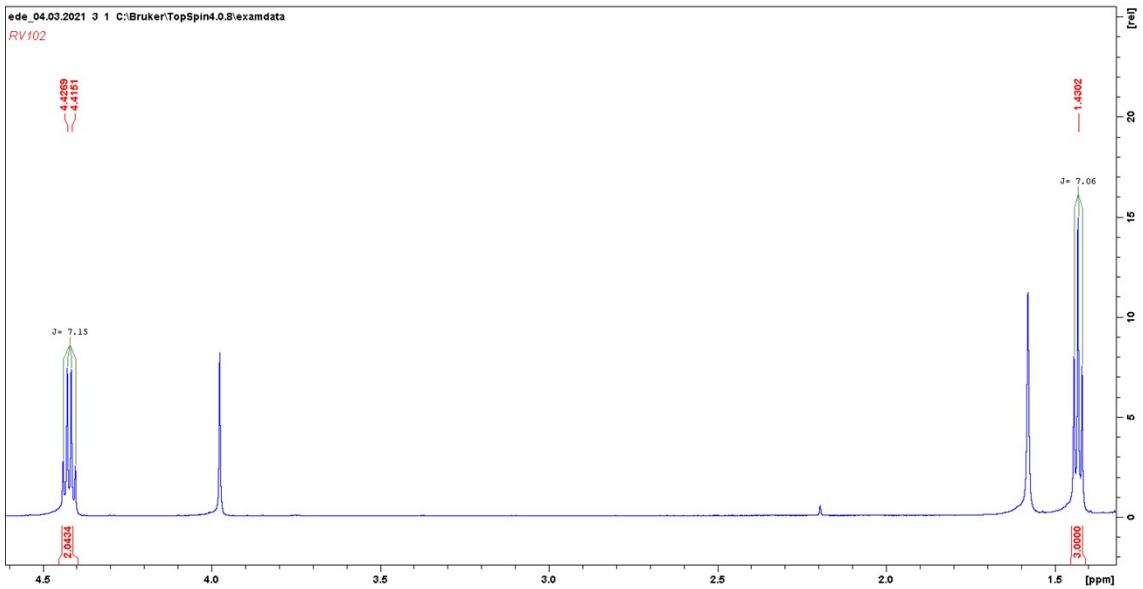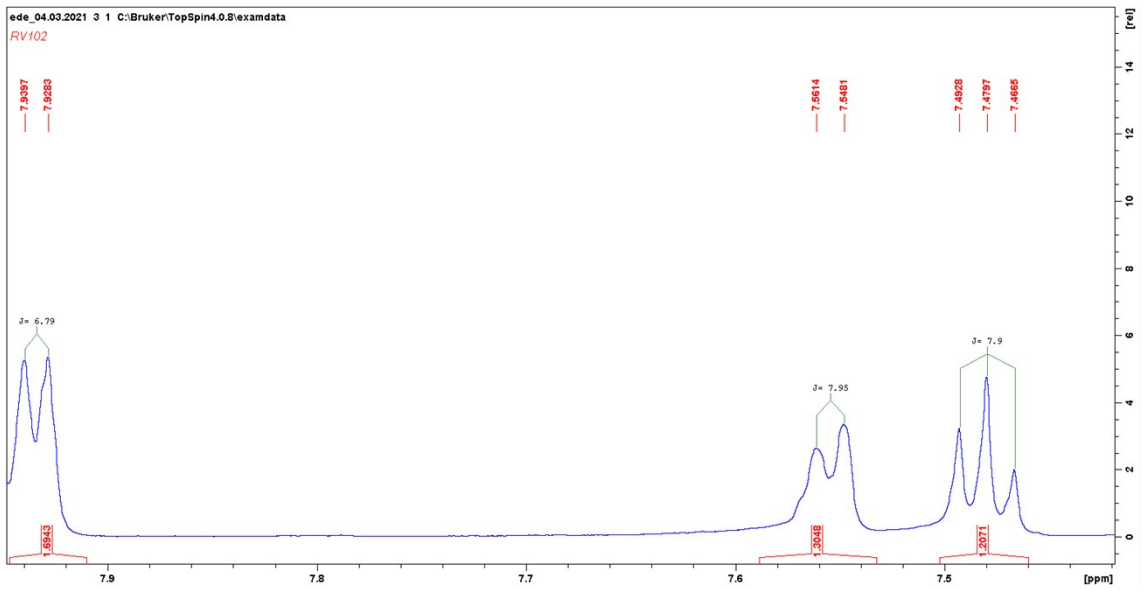

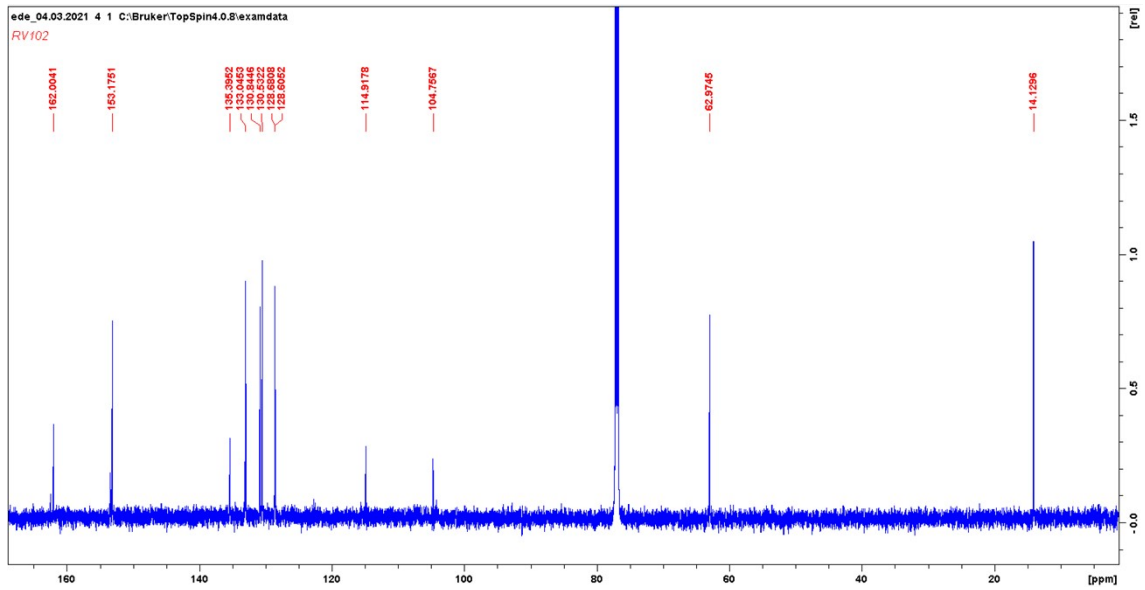

Spectrum1 #Data# RV102.qgd R.Time:13.925(Scan#:1072)  
MassPeaks:169  
RawMode:Averaged 13.517-14.017(1023-1083) BasePeak:234.60(10000)  
BG Mode:Averaged 14.408-14.408(1130-1130) Group 1 - Event 1

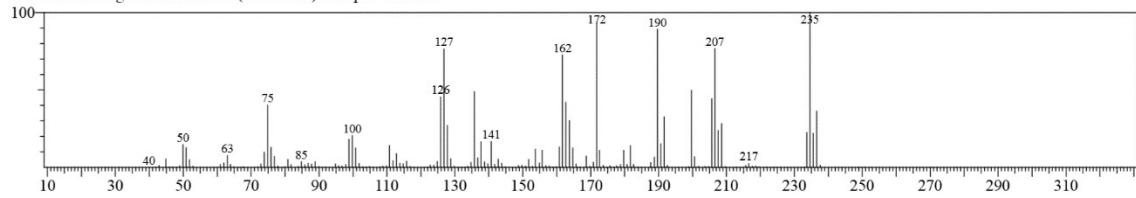

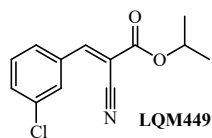

Isopropyl (*E*)-3-(3-chlorophenyl)-2-cyanoacrylate  
 Chemical Formula: C<sub>13</sub>H<sub>12</sub>ClNO<sub>2</sub>  
 Exact Mass: 249.69 g/mol

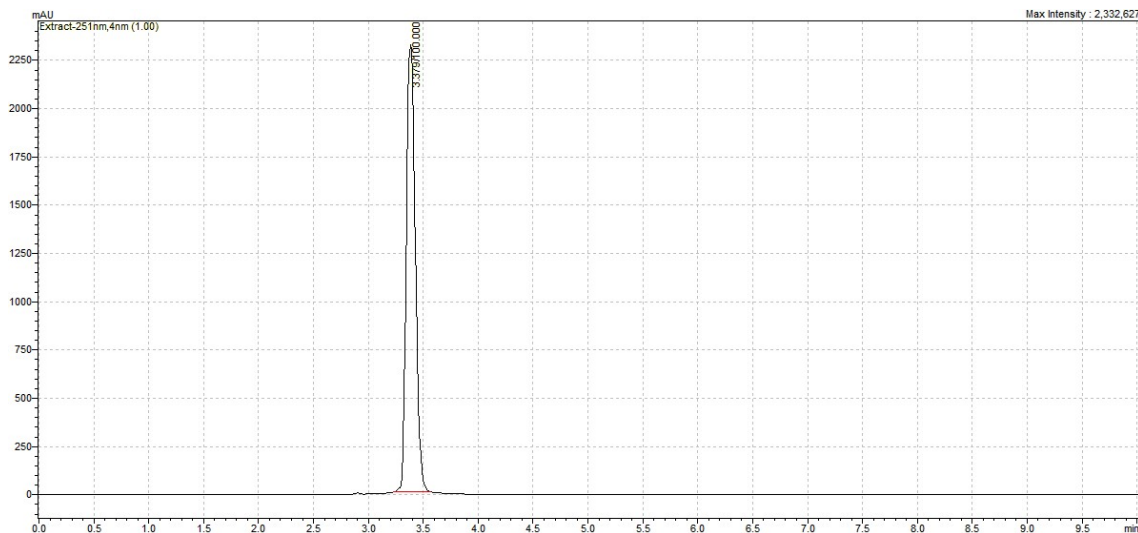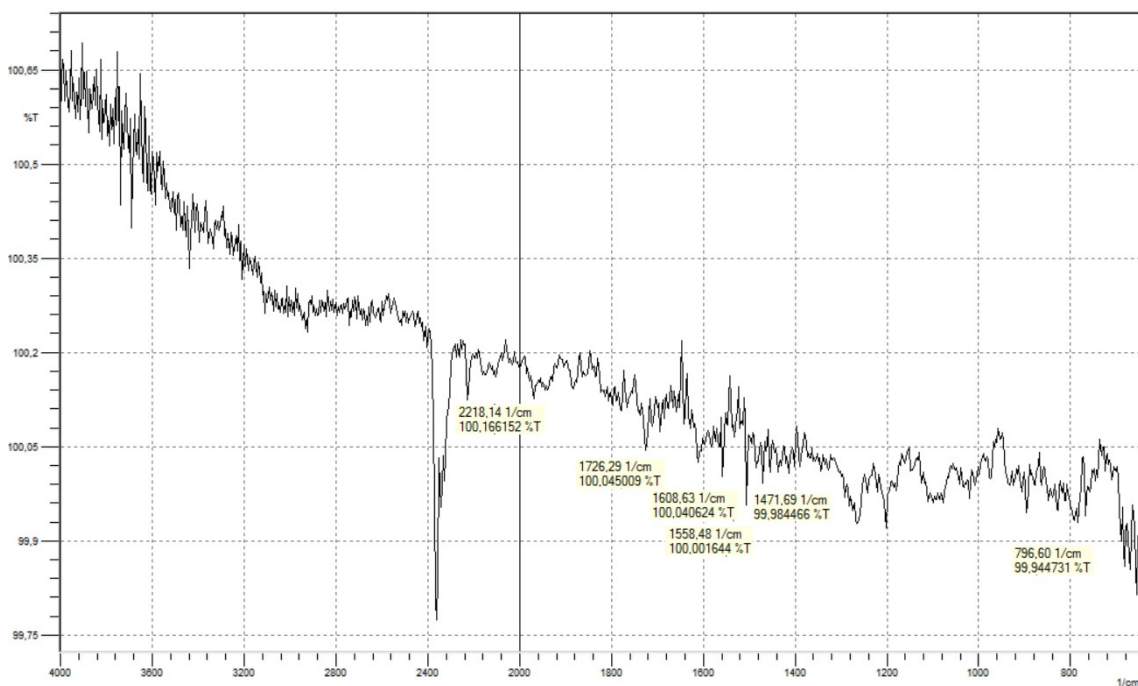

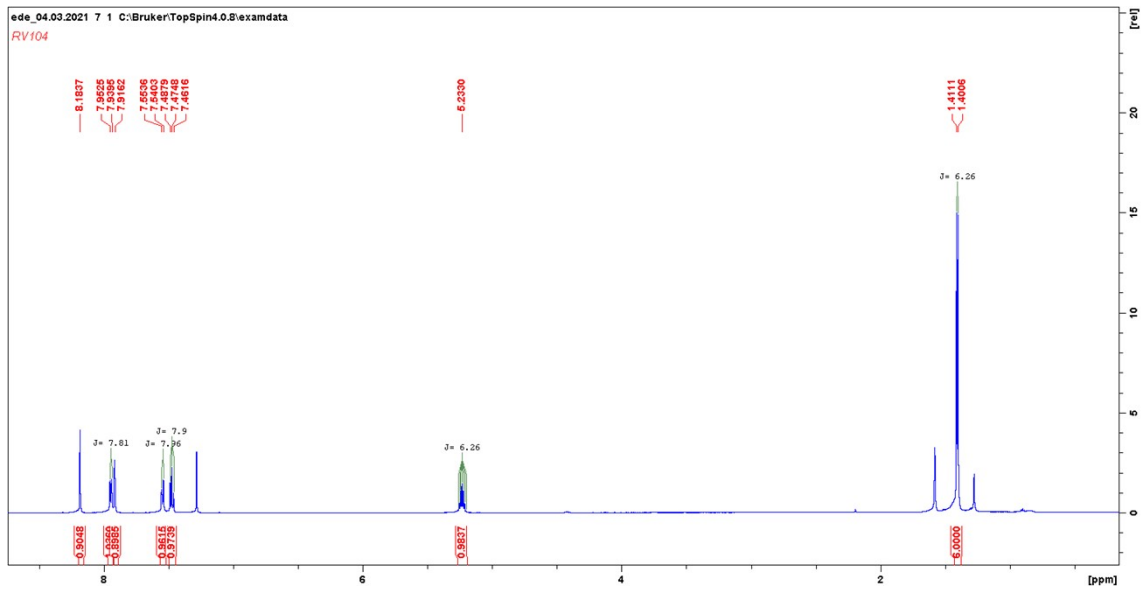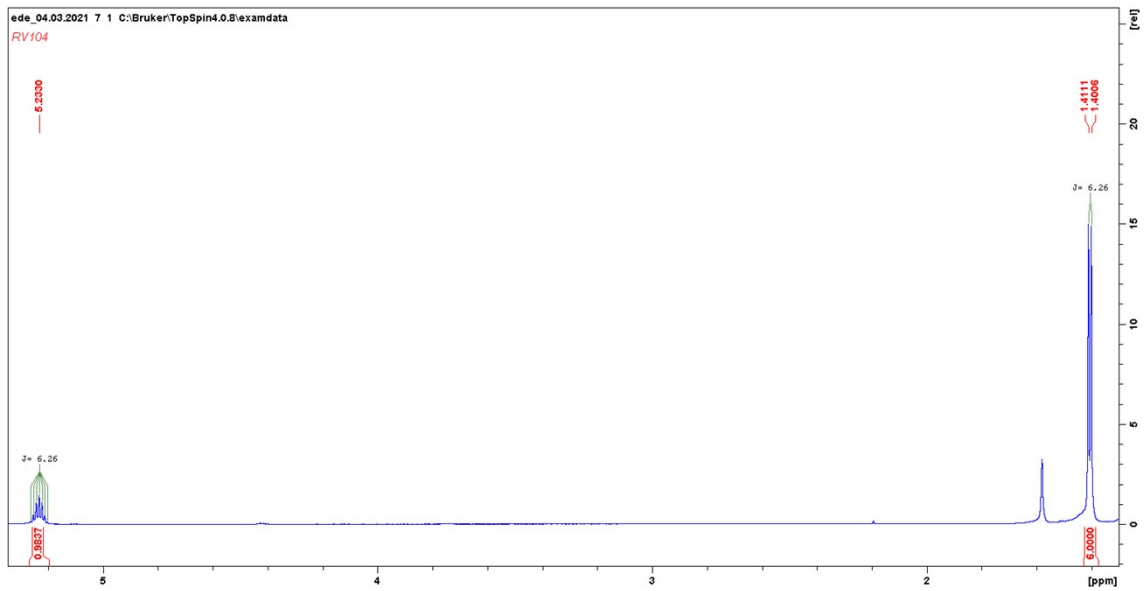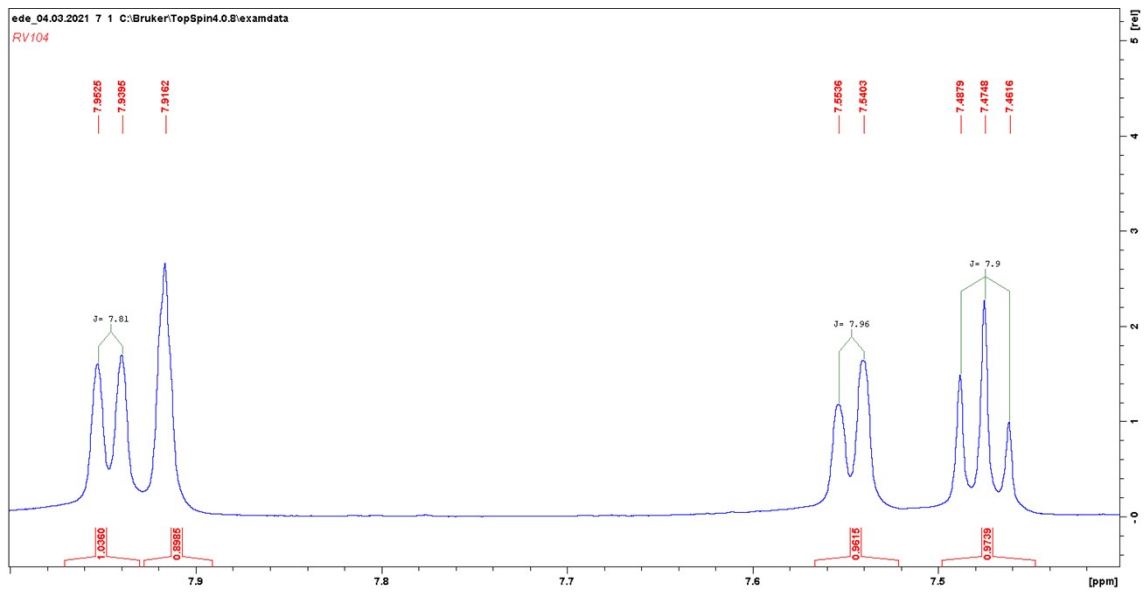

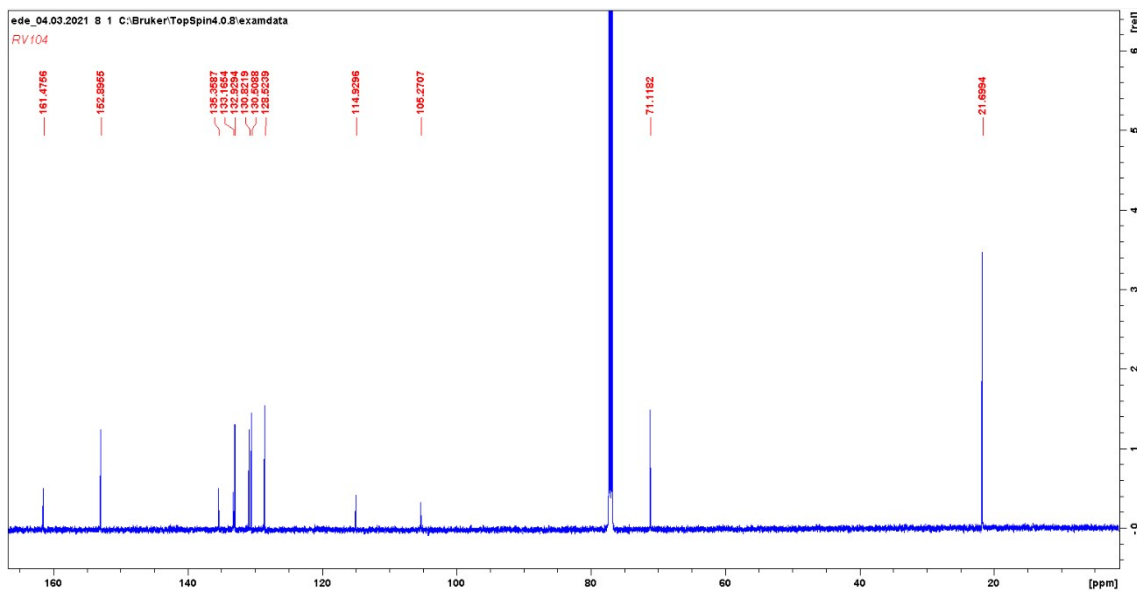

Spectrum1 #Data# RV104.qgd R.Time:14.133(Scan#:1097)  
MassPeaks:203  
RawMode:Averaged 13.742-14.367(1050-1125) BasePeak:206.60(10000)  
BG Mode:Averaged 17.458-17.842(1496-1542) Group 1 - Event 1

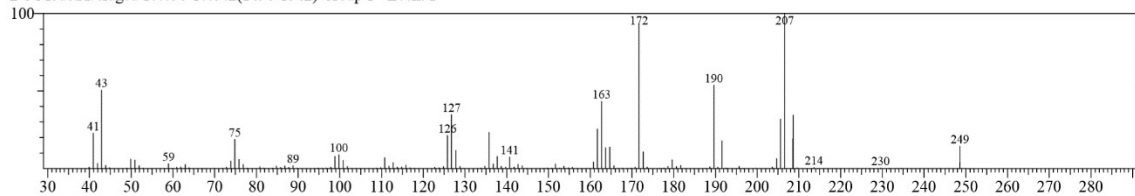

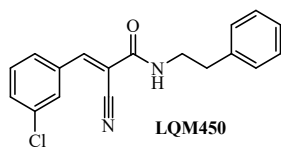

(*E*)-3-(3-Chlorophenyl)-2-cyano-*N*-phenethylacrylamide  
Chemical Formula: C<sub>18</sub>H<sub>15</sub>ClN<sub>2</sub>O  
Exact Mass: 310.78 g/mol

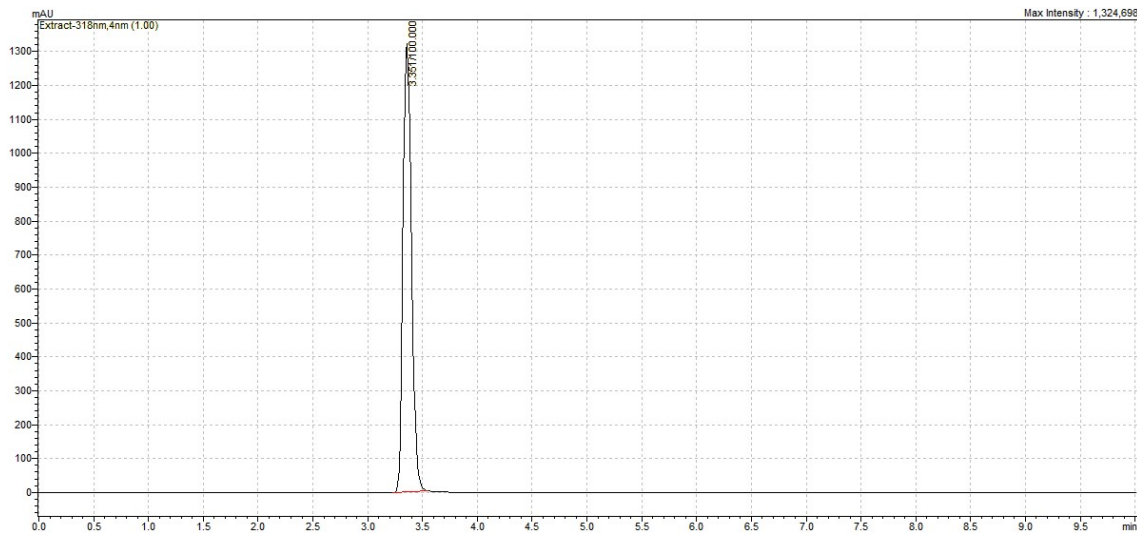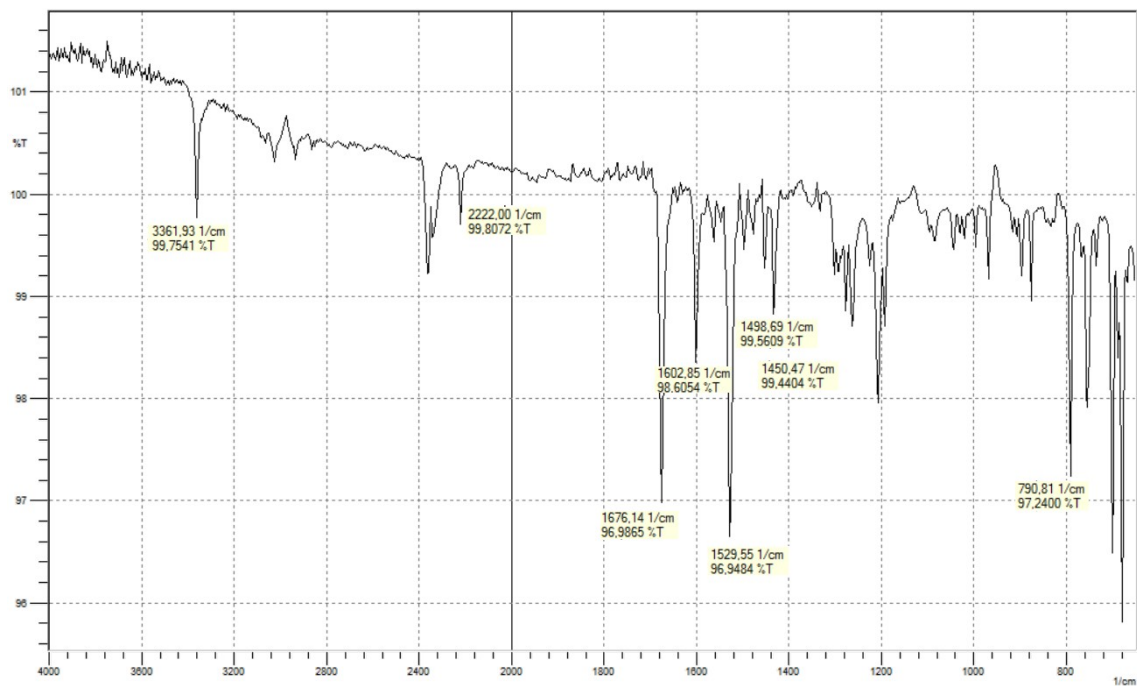

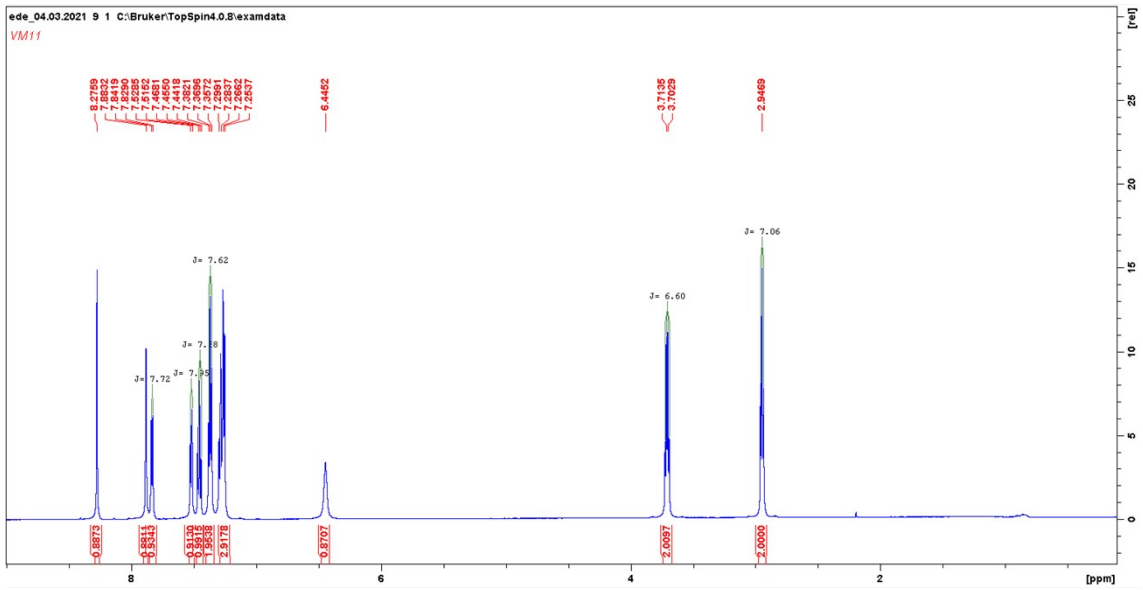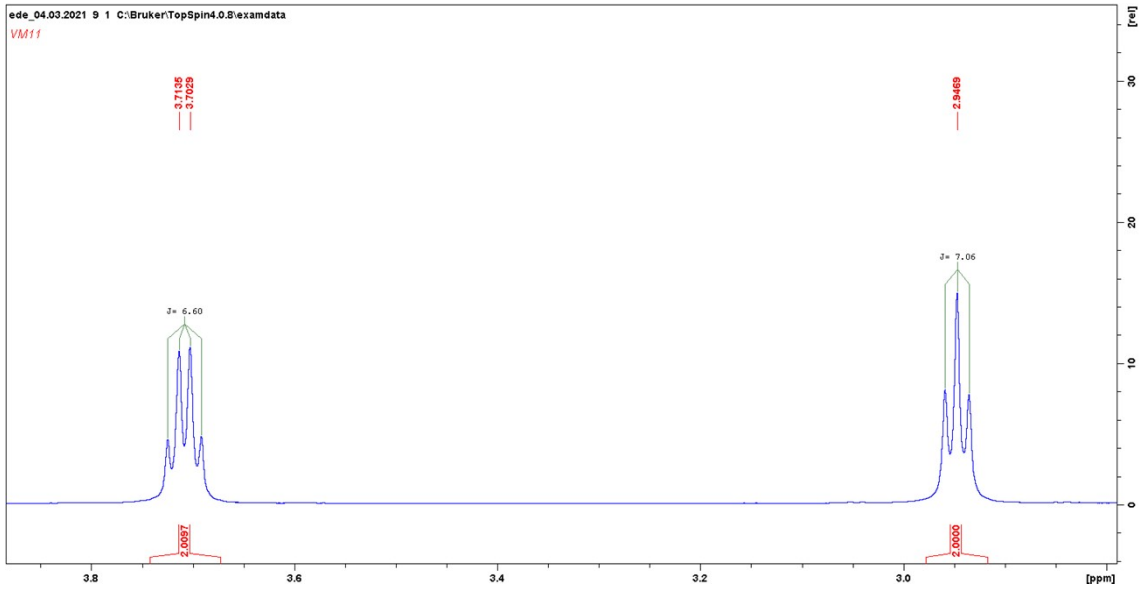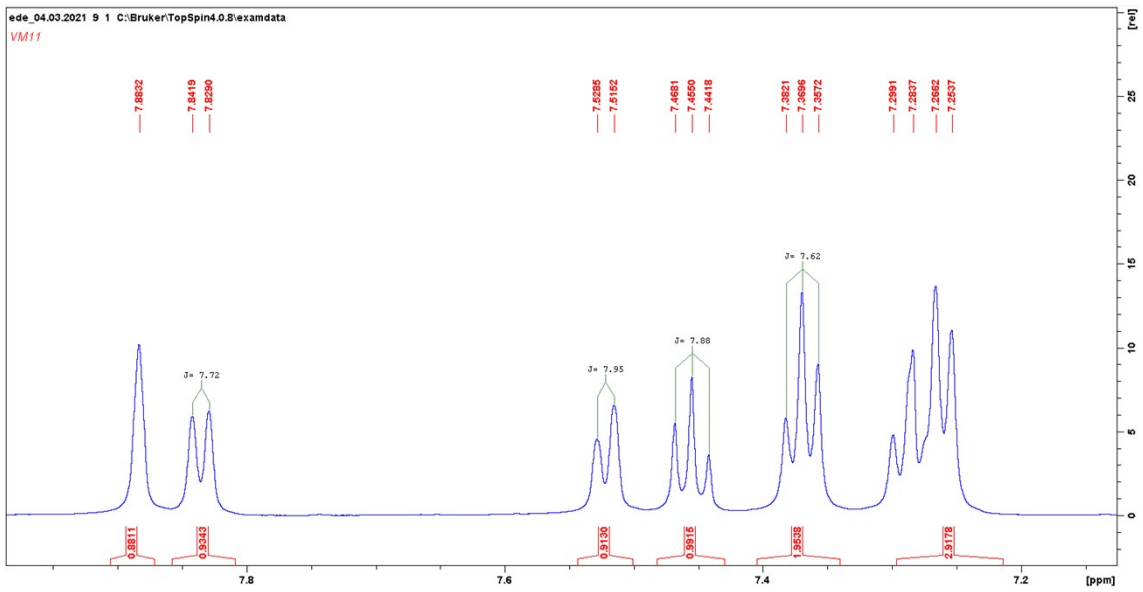

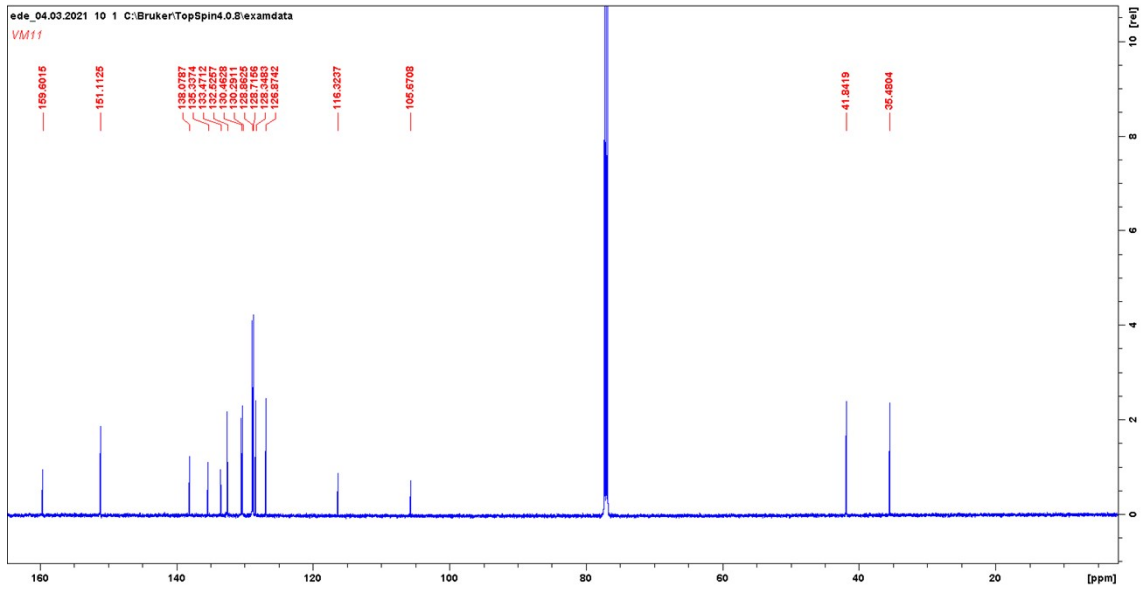

Spectrum1 #Data# VM11.qgd R.Time:21.292(Scan#:1956)  
MassPeaks:221  
RawMode:Averaged 21.167-21.325(1941-1960) BasePeak:103.85(10000)  
BG Mode:Averaged 21.392-21.392(1968-1968) Group 1 - Event 1

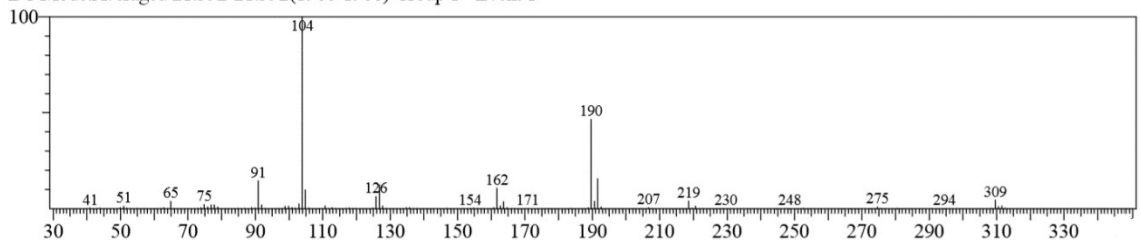



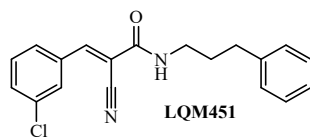

**LQM451**  
*(E)*-3-(3-Chlorophenyl)-2-cyano-*N*-(3-phenylpropyl)acrylamide  
 Chemical Formula: C<sub>19</sub>H<sub>17</sub>ClN<sub>2</sub>O  
 Exact Mass: 324.81 g/mol

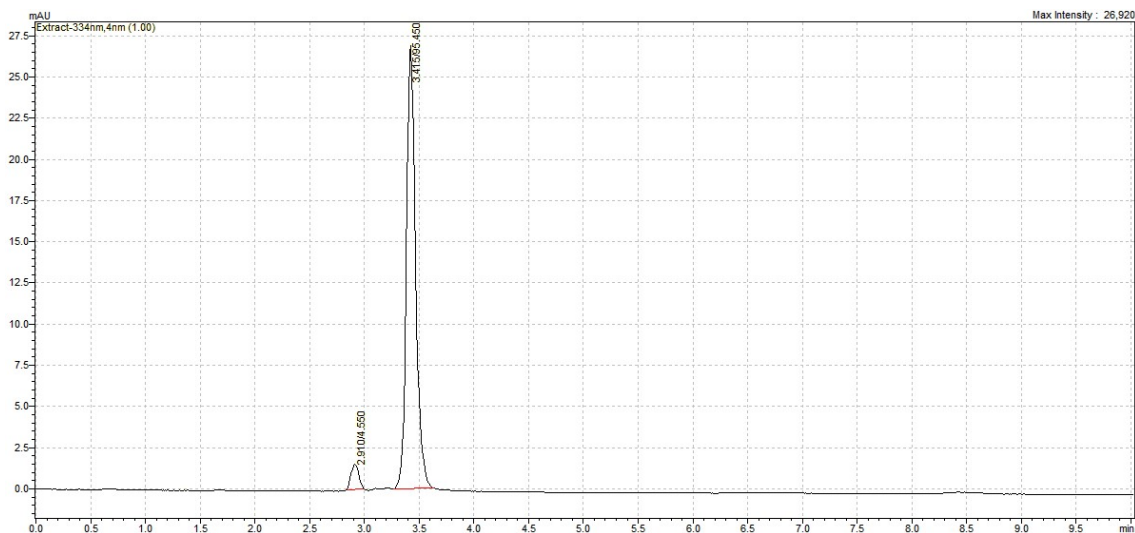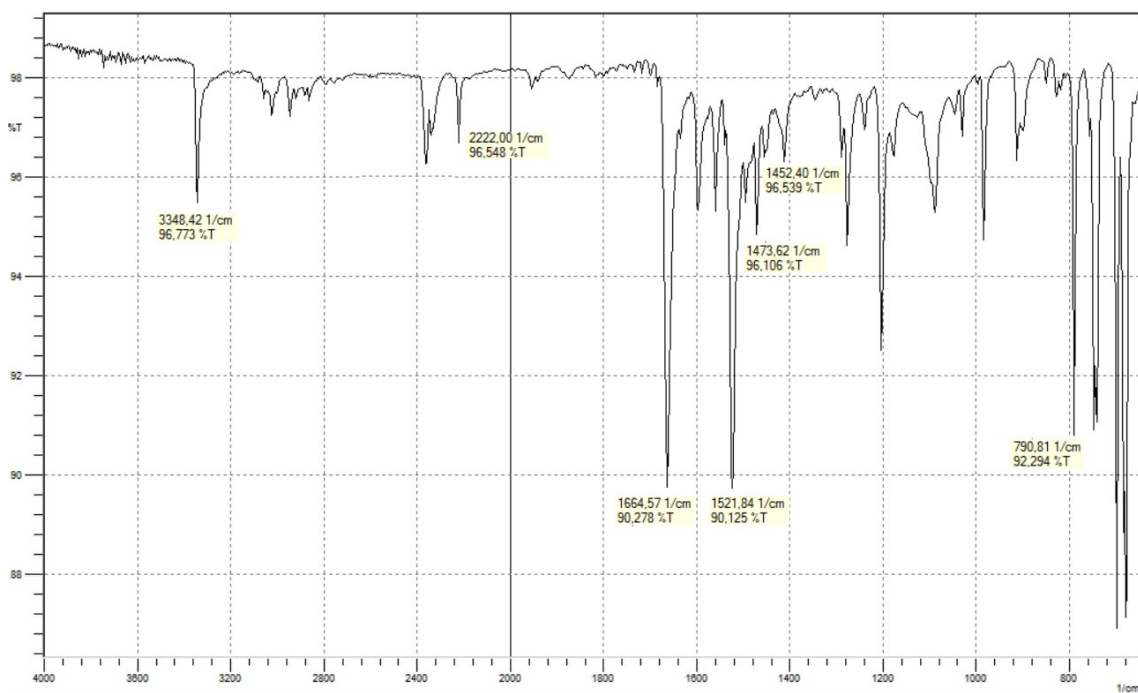

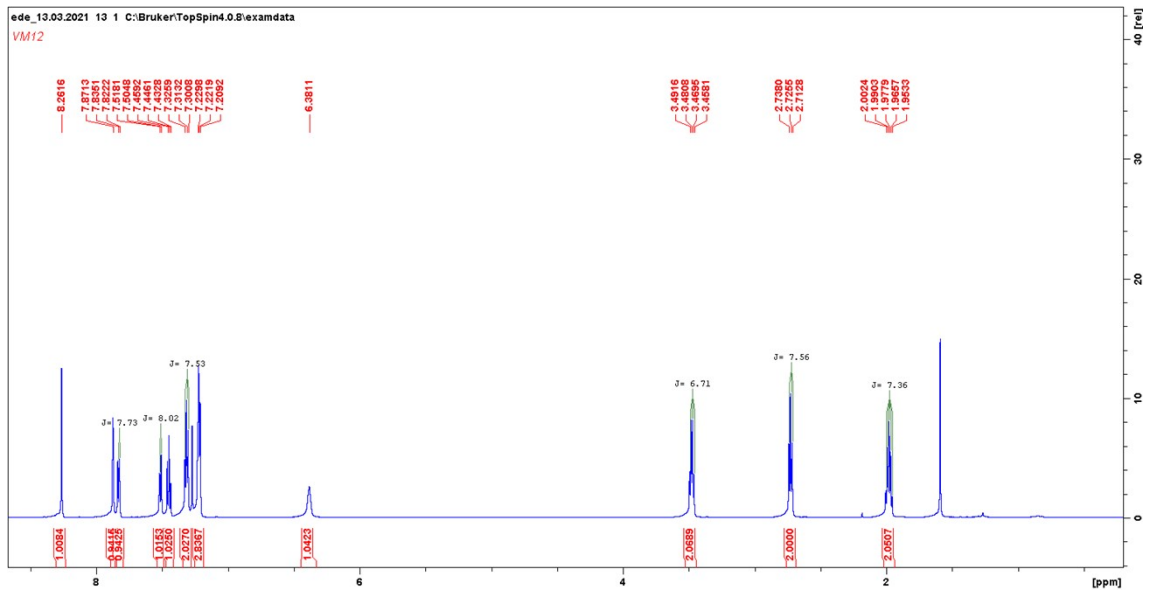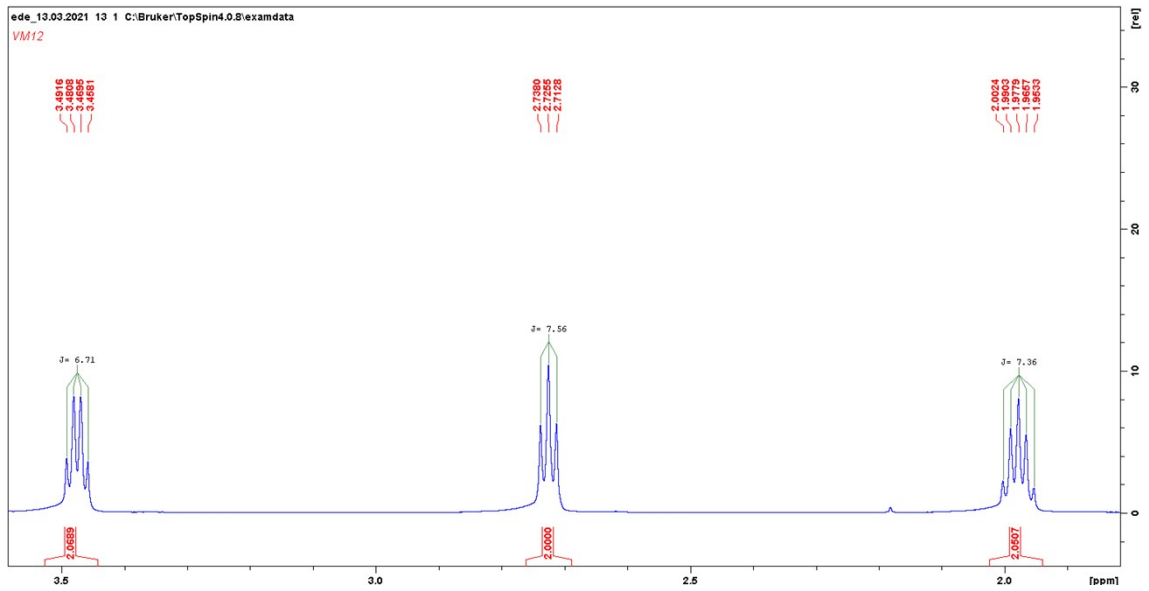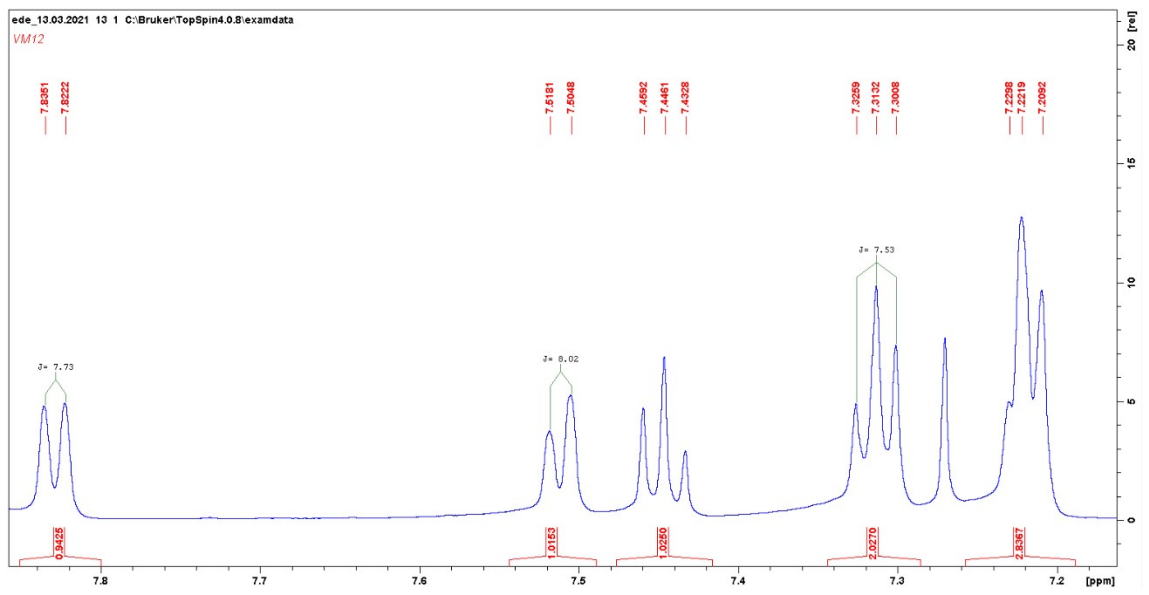

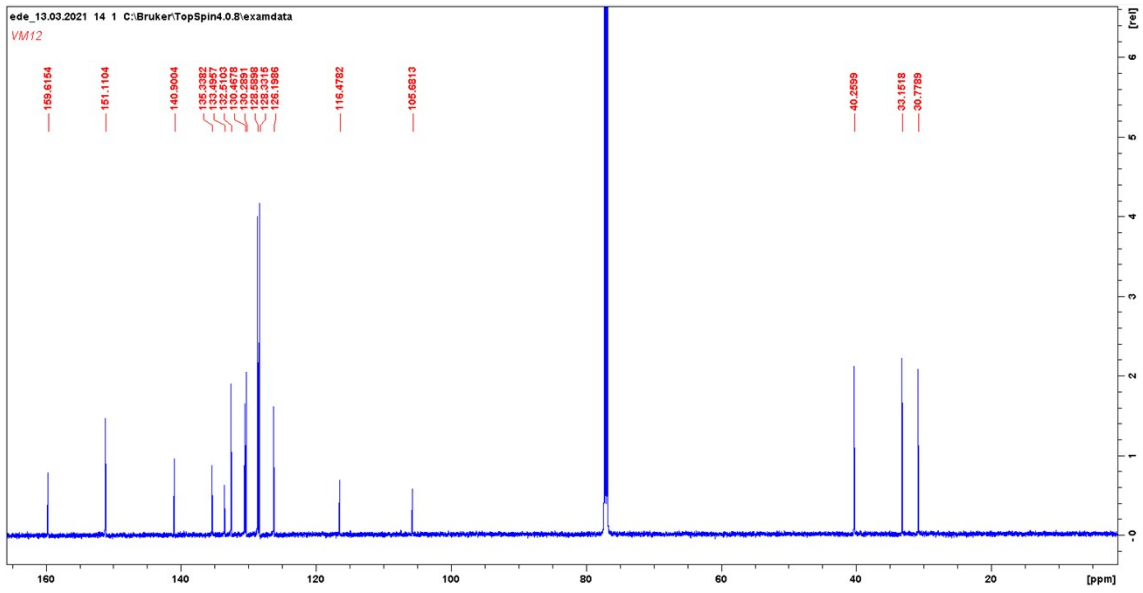

Spectrum1 #Data# VM12.qgd R.Time:23.008(Scan#:2162)  
MassPeaks:264  
RawMode:Averaged 22.092-23.433(2052-2213) BasePeak:184.75(10000)  
BG Mode:Averaged 25.100-25.508(2413-2462) Group 1 - Event 1

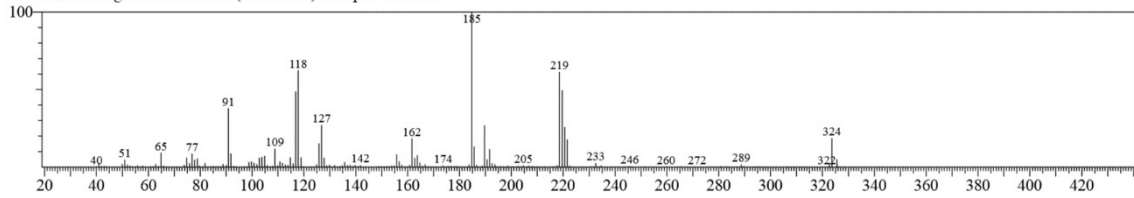

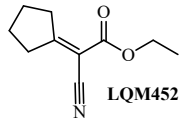

Ethyl 2-cyano-2-cyclopentylideneacetate  
Chemical Formula: C<sub>10</sub>H<sub>13</sub>NO<sub>2</sub>  
Exact Mass: 179.22 g/mol

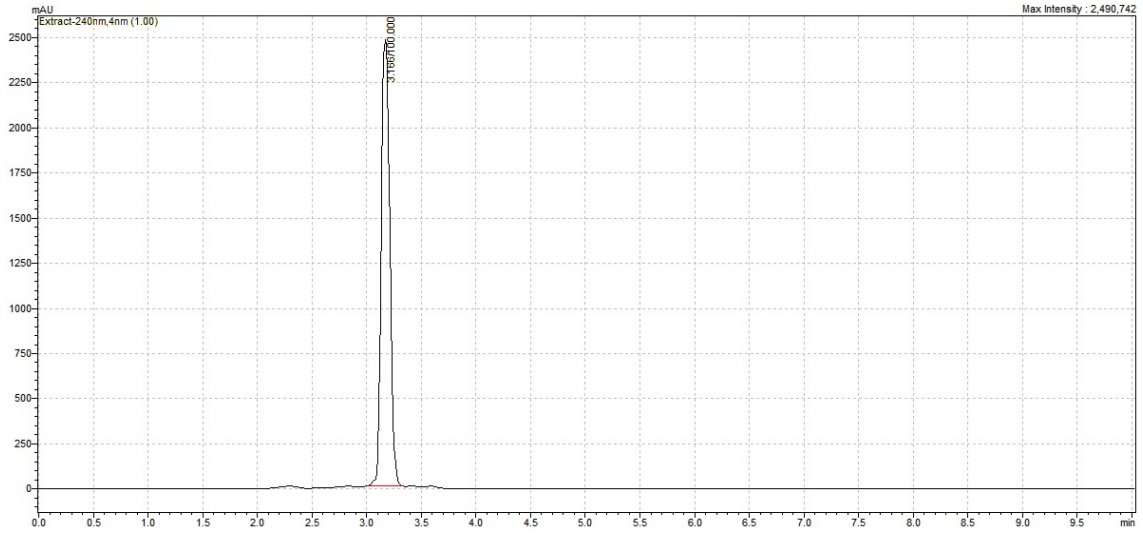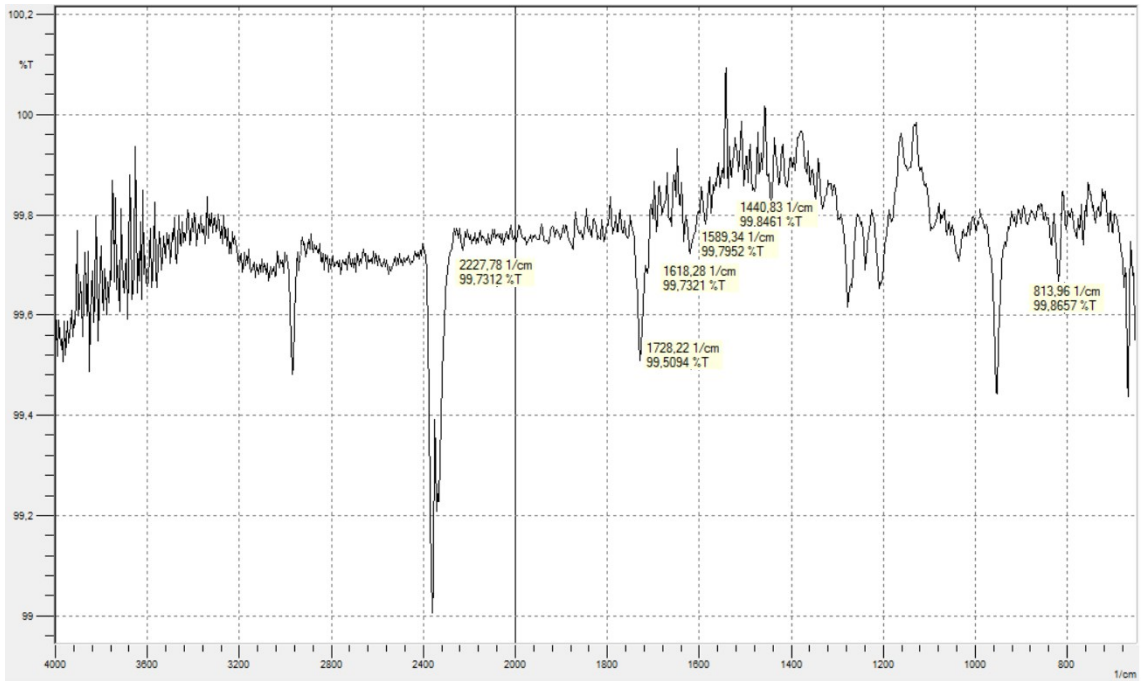

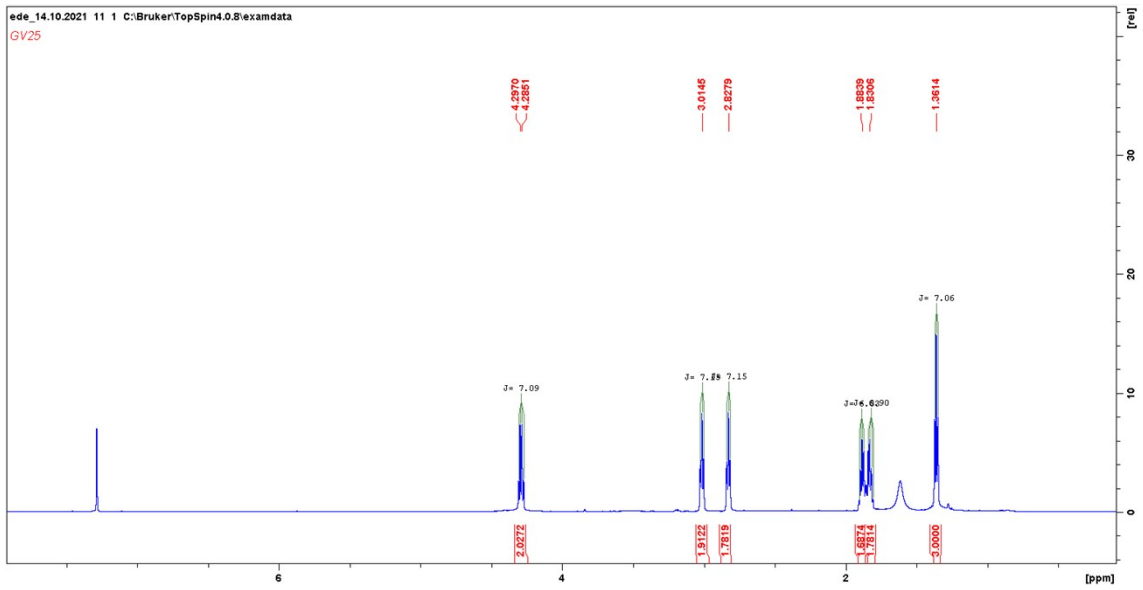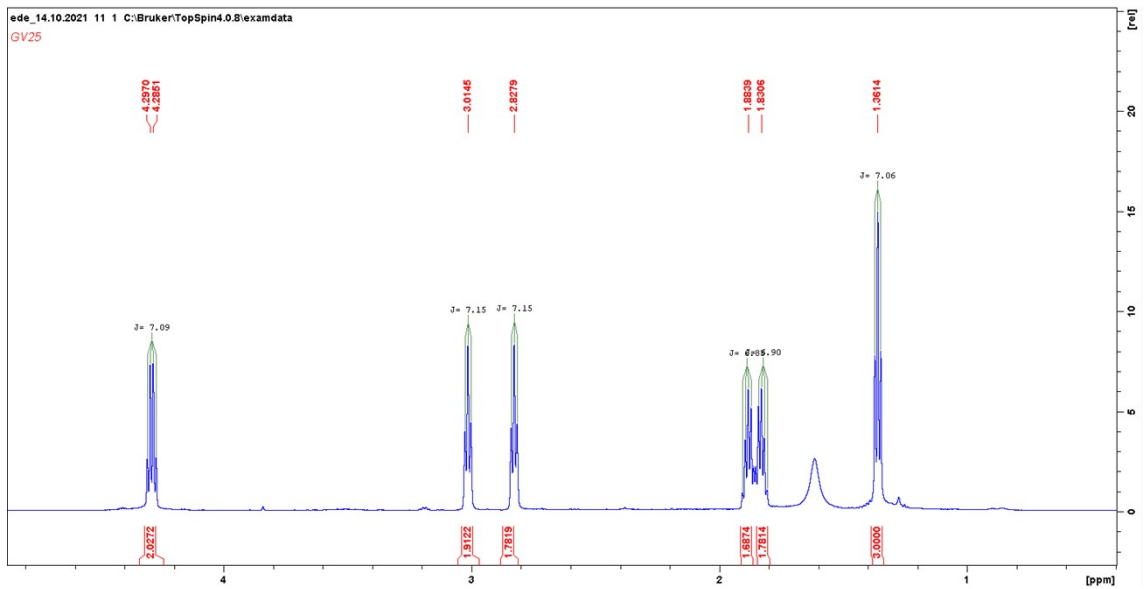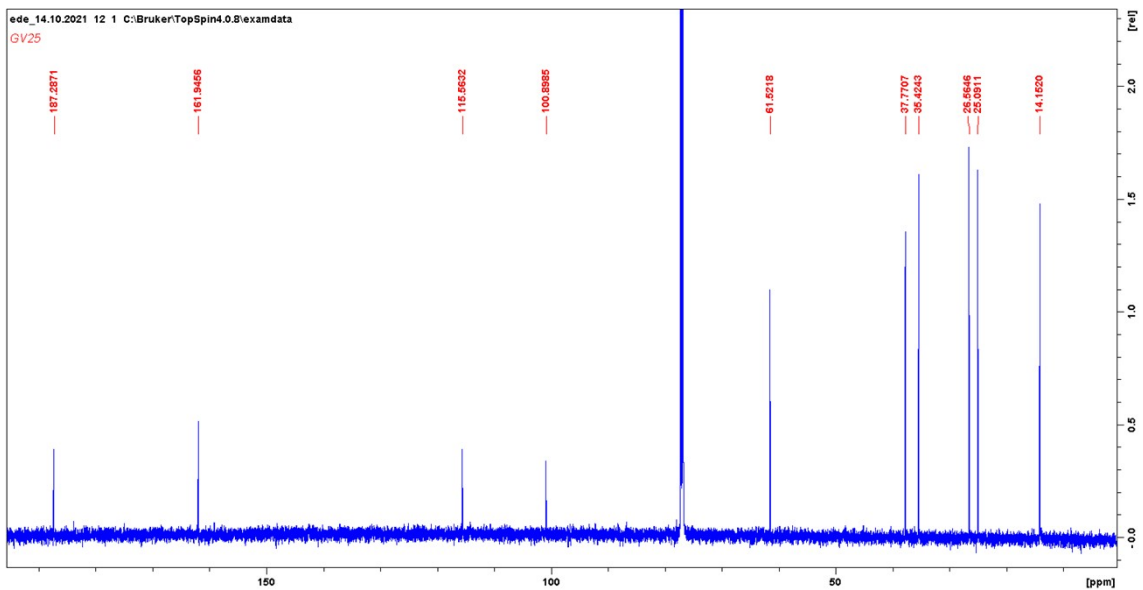

Spectrum1 #Data# GV25.qgd R.Time:9.075(Scan#:490)

MassPeaks:120

RawMode:Averaged 8.583-9.300(431-517) BasePeak:122.80(10000)

BG Mode:Averaged 13.467-13.467(1017-1017) Group 1 - Event 1

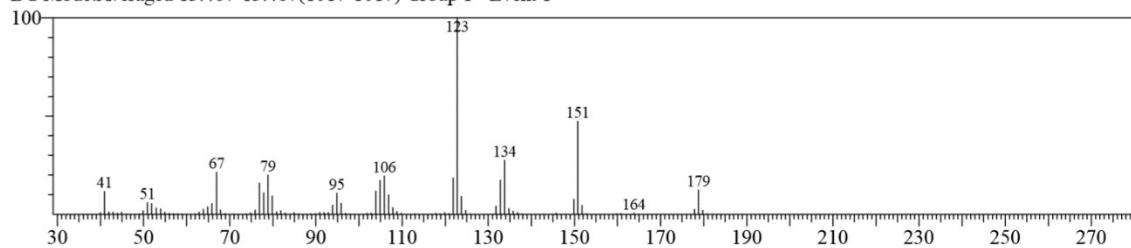

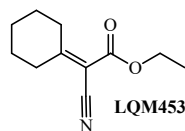

Ethyl 2-cyano-2-cyclohexylideneacetate  
Chemical Formula:  $C_{11}H_{15}NO_2$   
Exact Mass: 193.25 g/mol

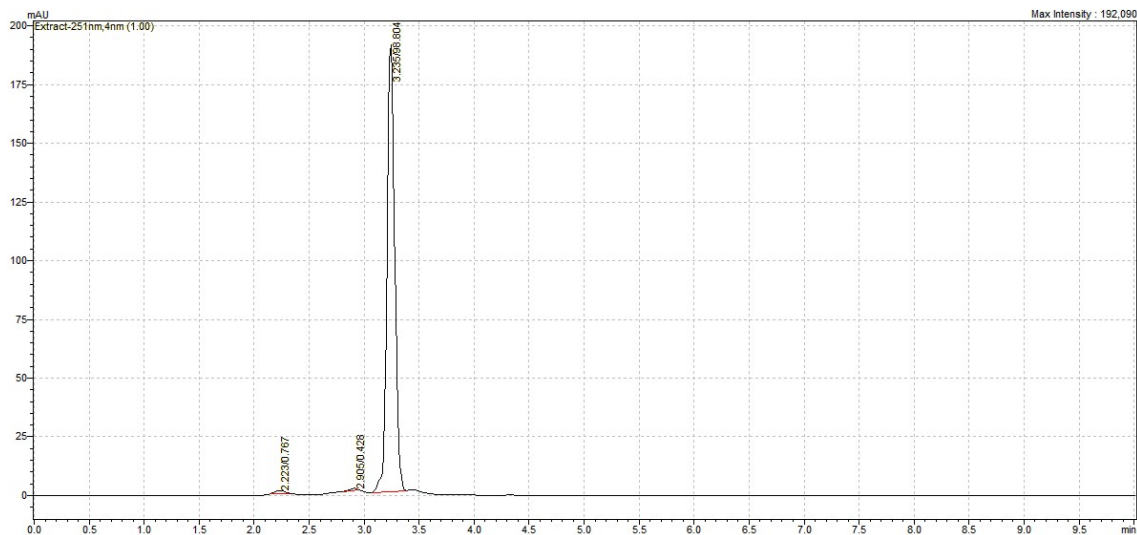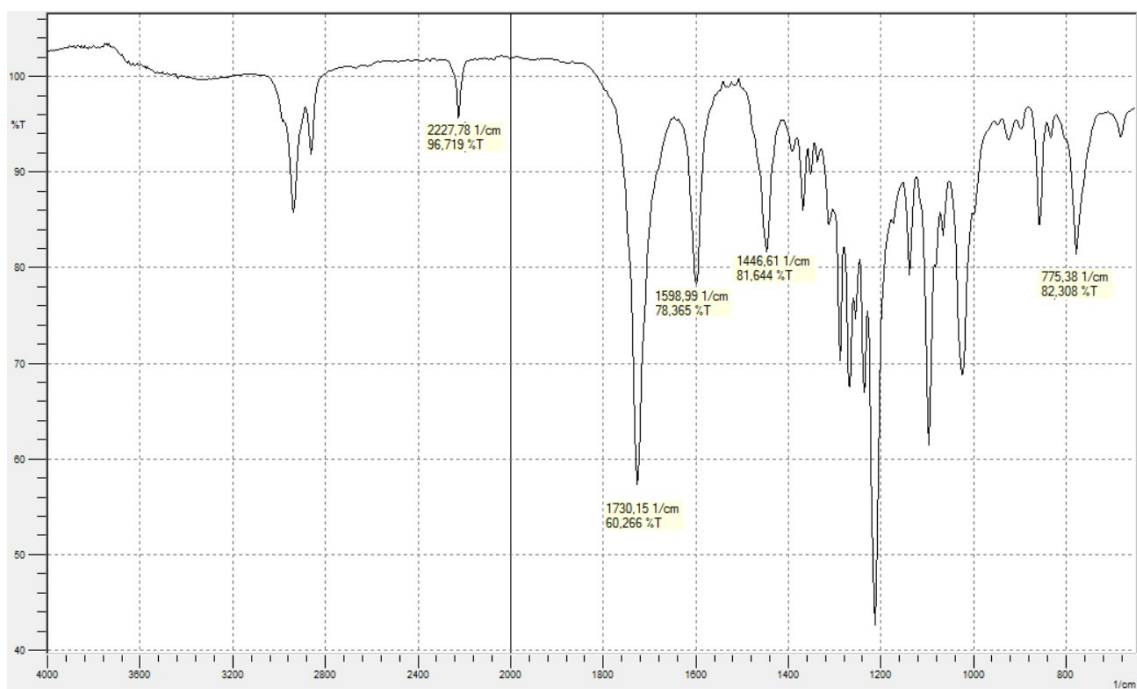

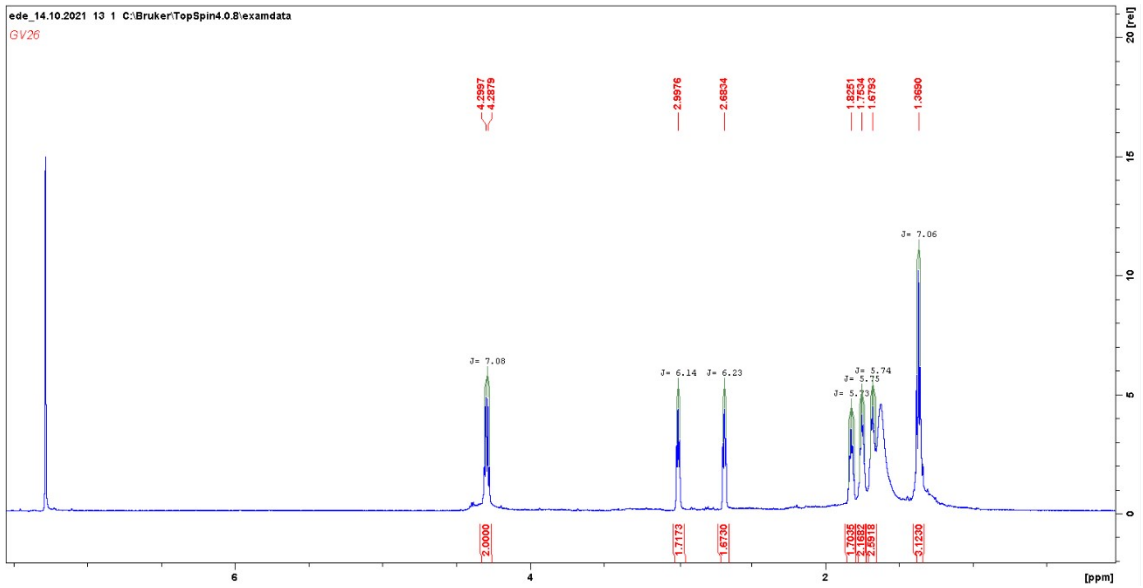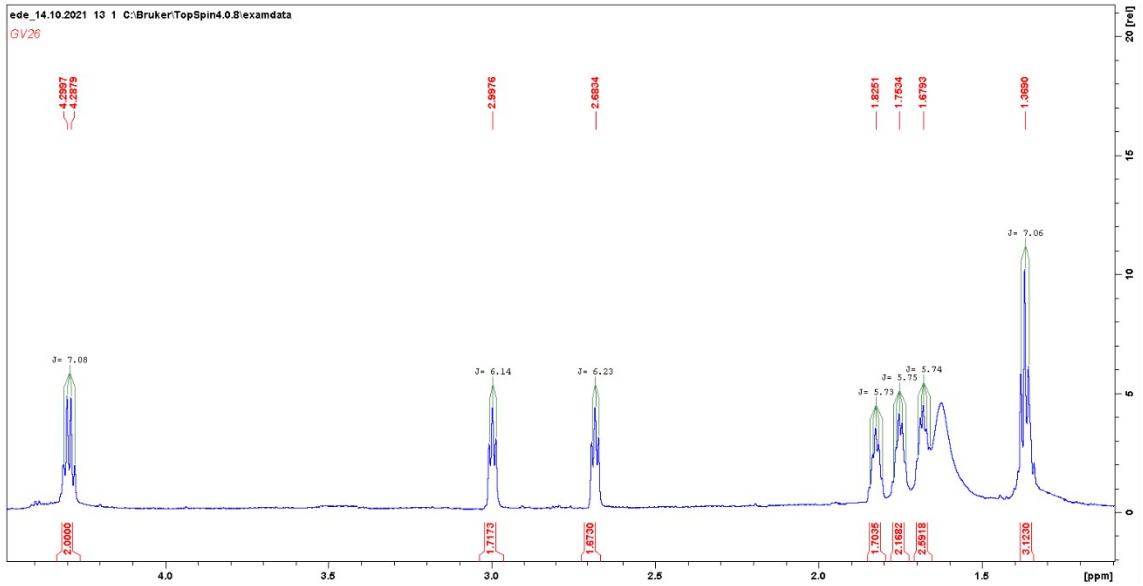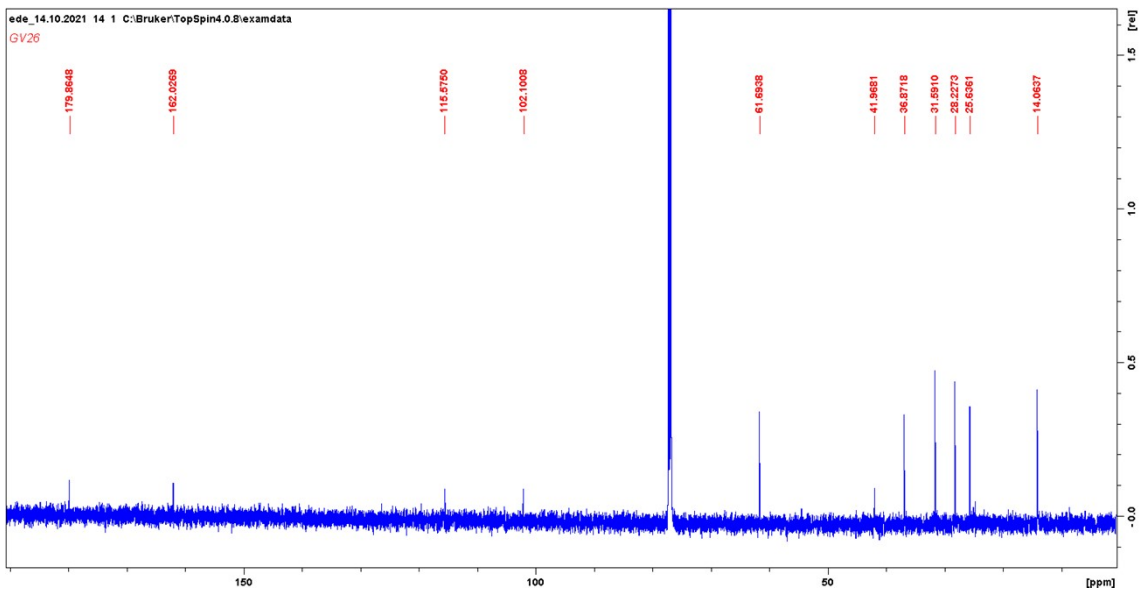



Spectrum1 #Data# GV26.qgd R.Time:10.642(Scan#:678)  
MassPeaks:133  
RawMode:Averaged 10.442-10.775(654-694) BasePeak:136.80(10000)  
BG Mode:Averaged 13.683-13.683(1043-1043) Group 1 - Event 1

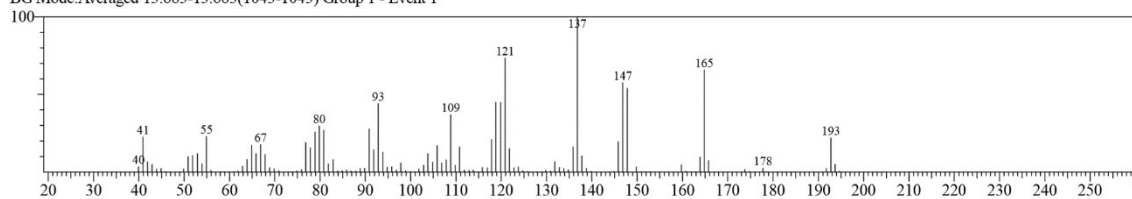

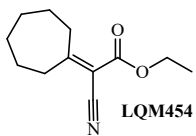

Ethyl 2-cyano-2-cycloheptylideneacetate  
Chemical Formula:  $C_{12}H_{17}NO_2$   
Exact Mass: 207.27 g/mol

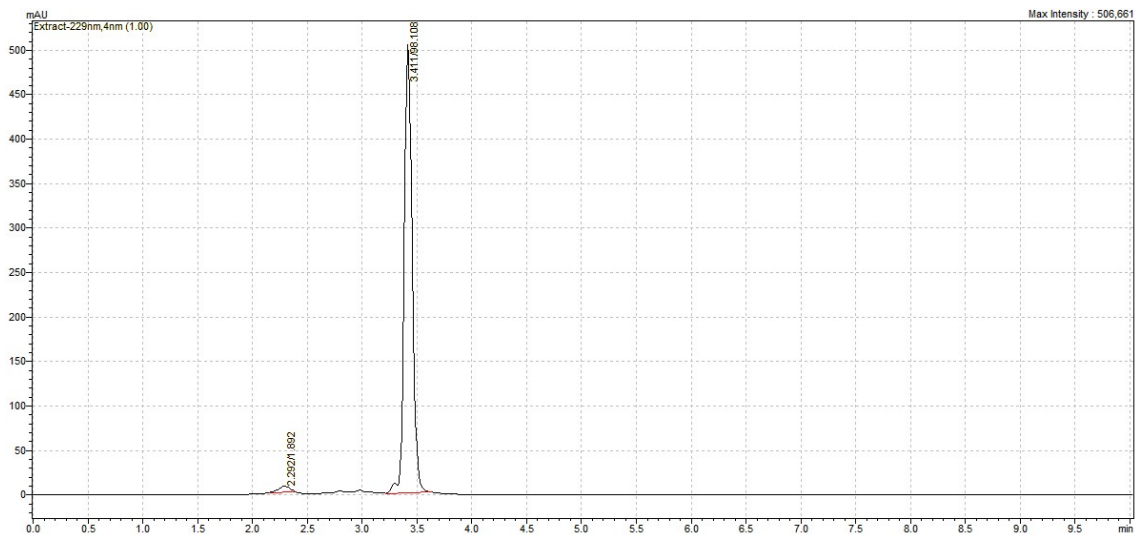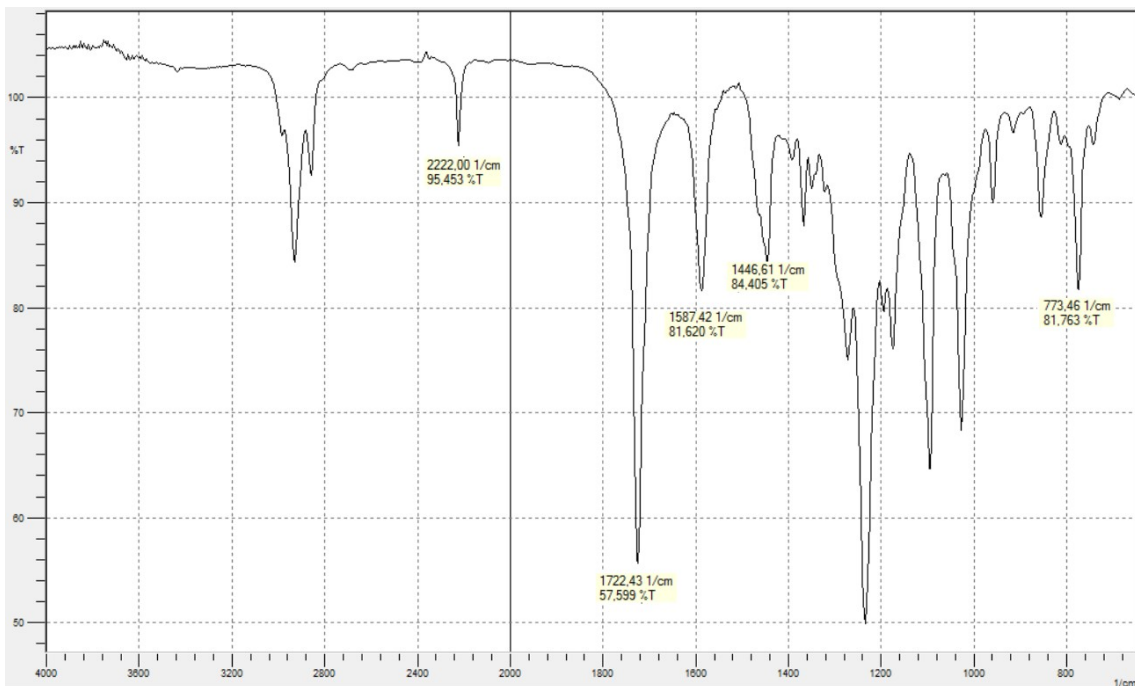

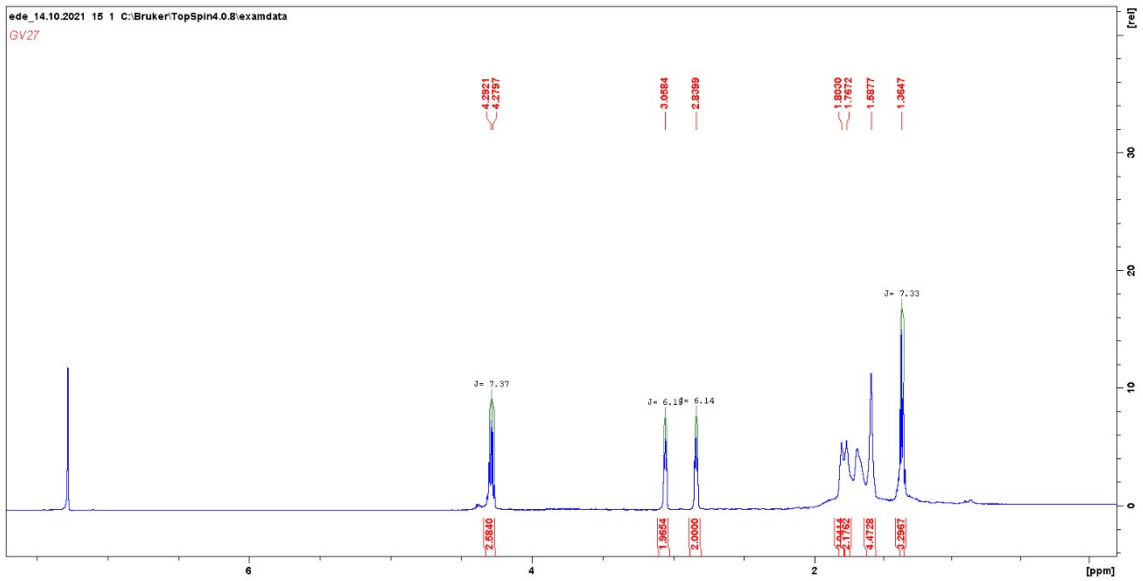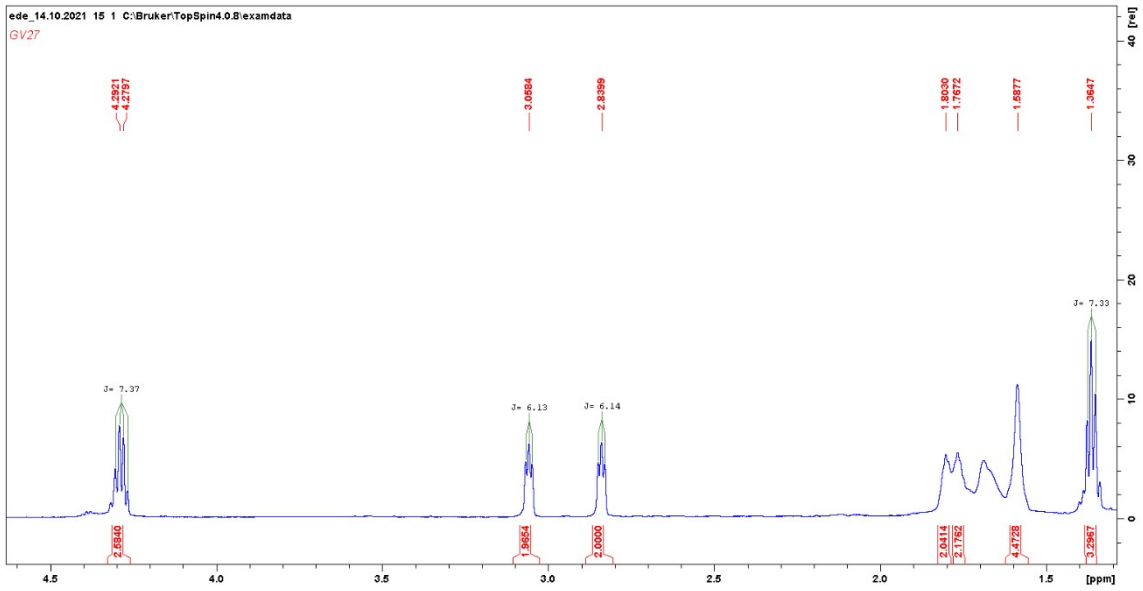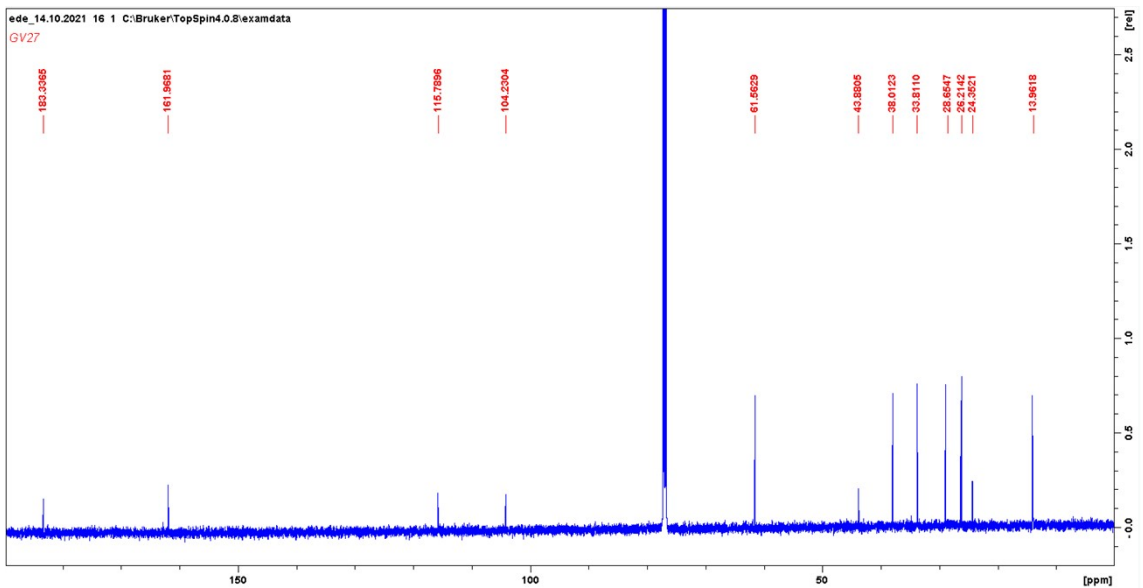

Spectrum1 #Data# GV27.qgd R.Time:11.975(Scan#:838)  
MassPeaks:170  
RawMode:Averaged 11.642-12.092(798-852) BasePeak:150.75(10000)  
BG Mode:Averaged 12.242-12.242(870-870) Group 1 - Event 1

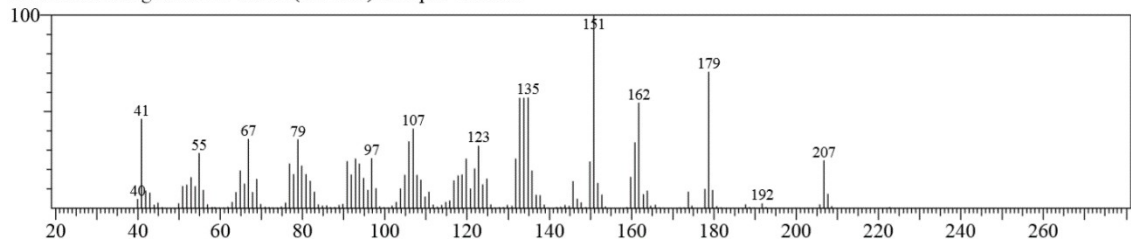

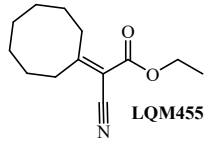

Ethyl 2-cyano-2-cyclooctylideneacetate  
 Chemical Formula:  $C_{13}H_{19}NO_2$   
 Exact Mass: 221.30 g/mol

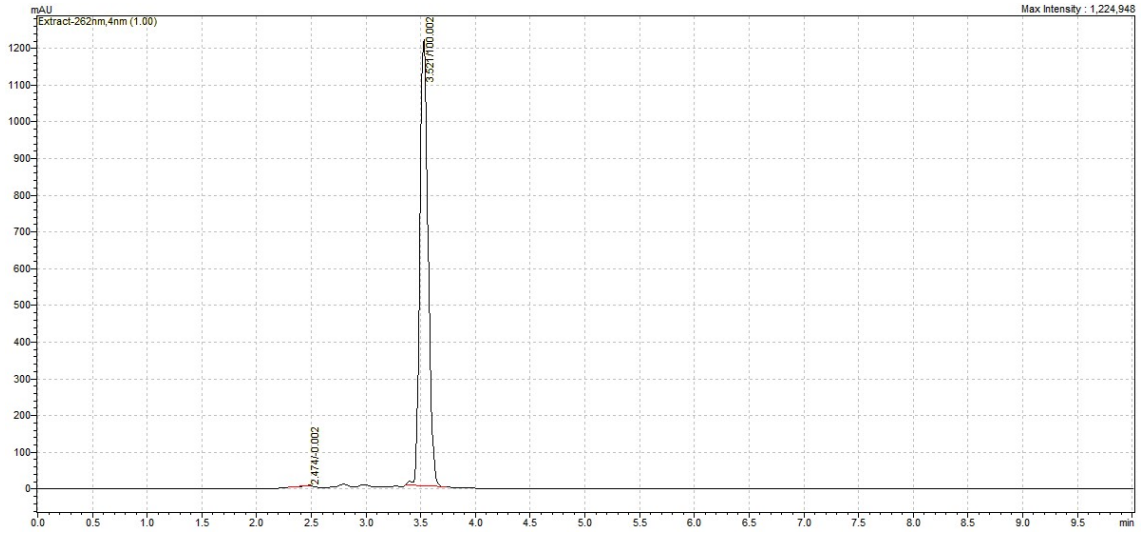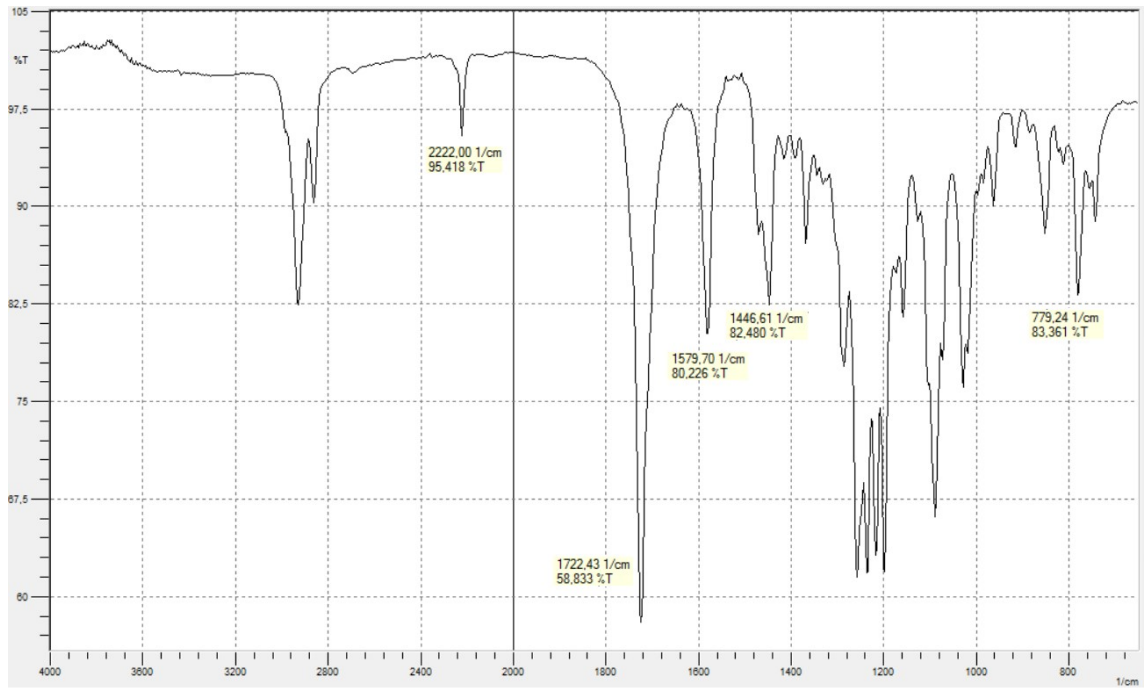

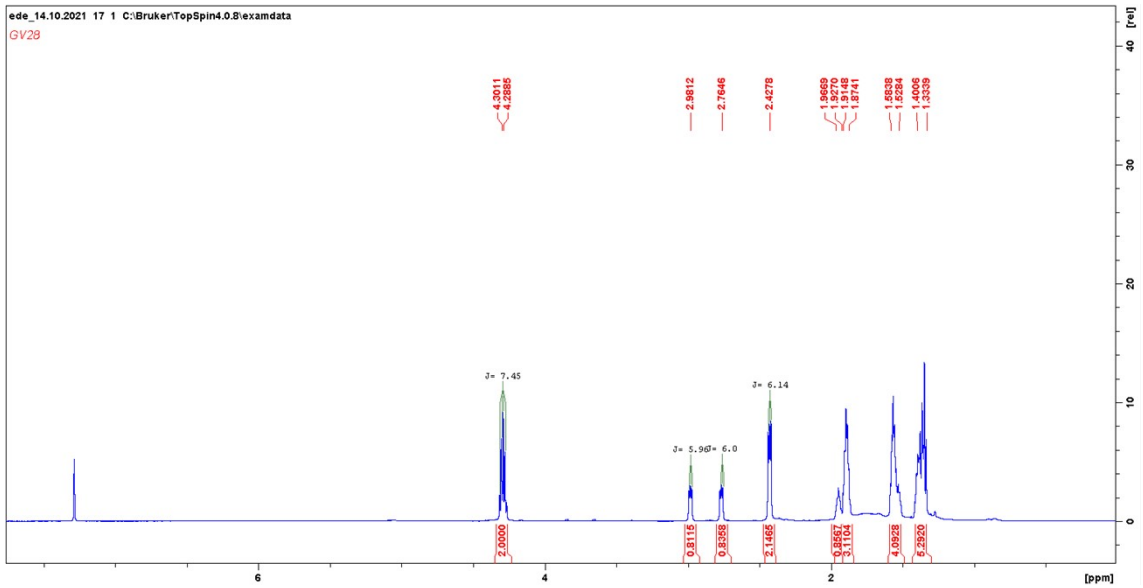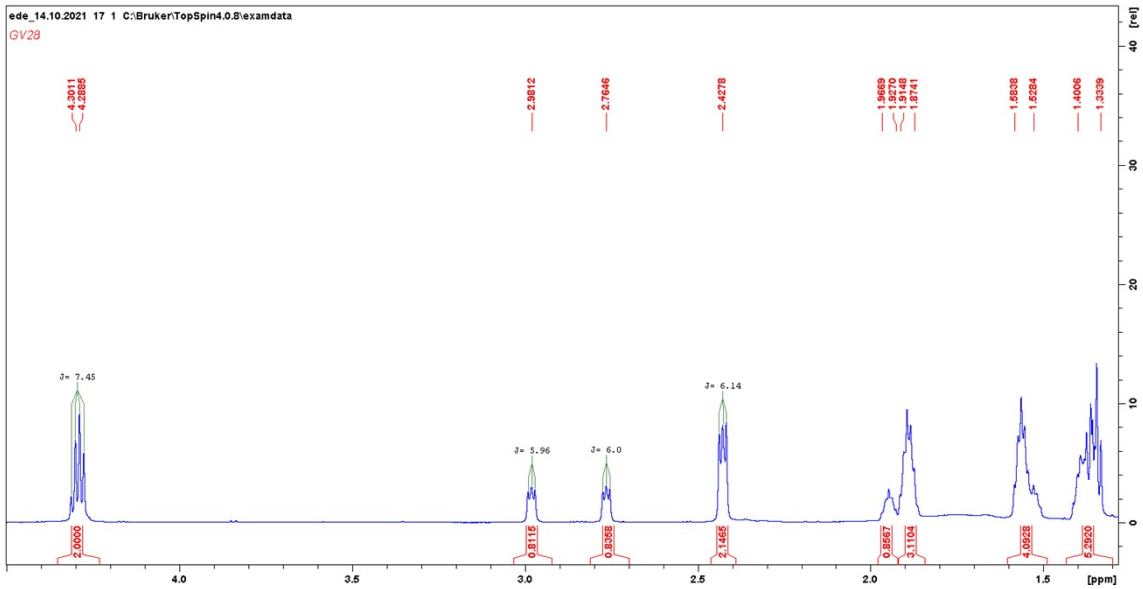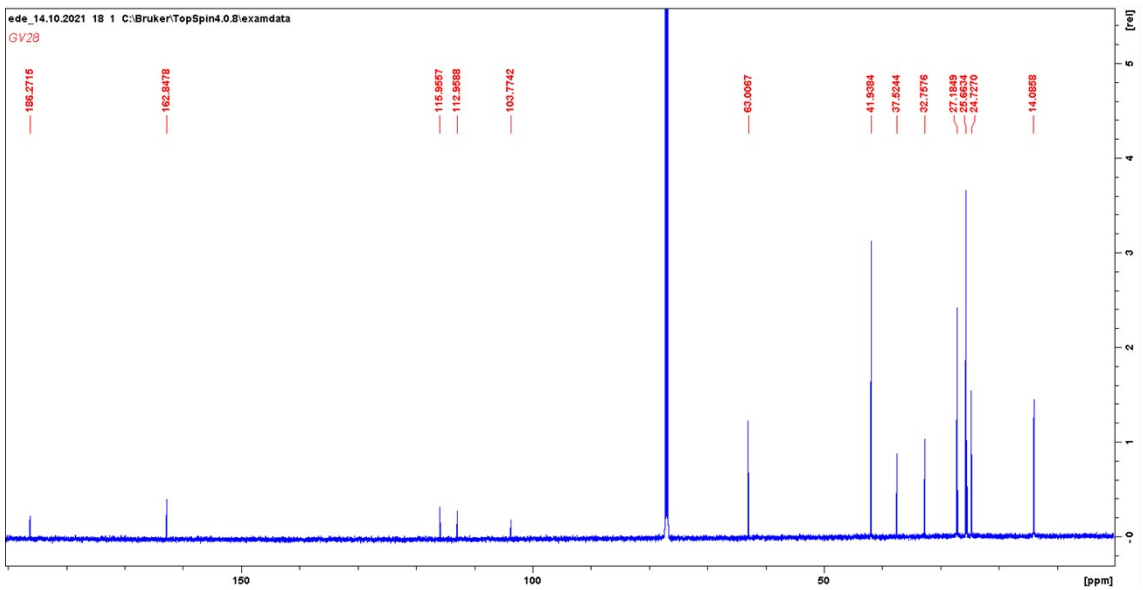

Spectrum1 #Data# GV28.qgd R.Time:12.933(Scan#:953)  
MassPeaks:167  
RawMode:Averaged 12.725-12.967(928-957) BasePeak:192.75(10000)  
BG Mode:Averaged 14.950-14.950(1195-1195) Group 1 - Event 1

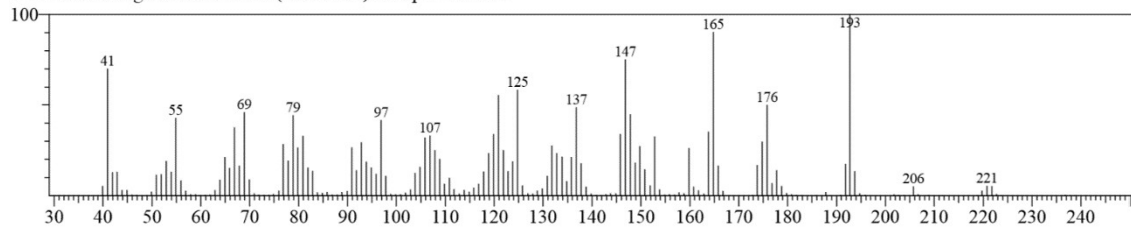

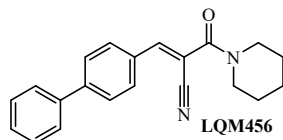

(*E*)-3-([1,1'-Biphenyl]-4-yl)-2-(piperidine-1-carbonyl)acrylonitrile  
 Chemical Formula: C<sub>21</sub>H<sub>20</sub>N<sub>2</sub>O  
 Exact Mass: 316.40 g/mol

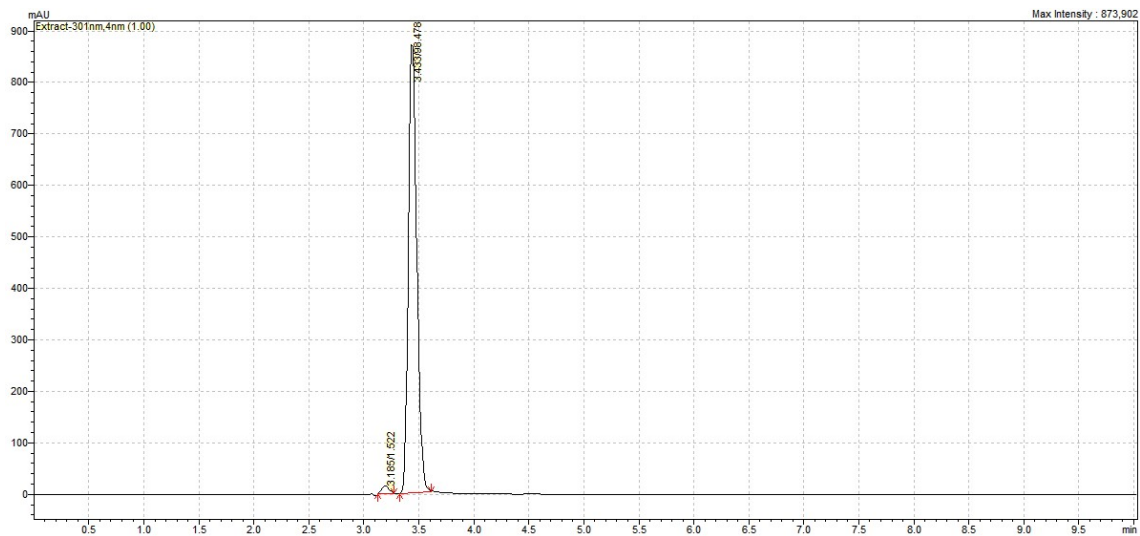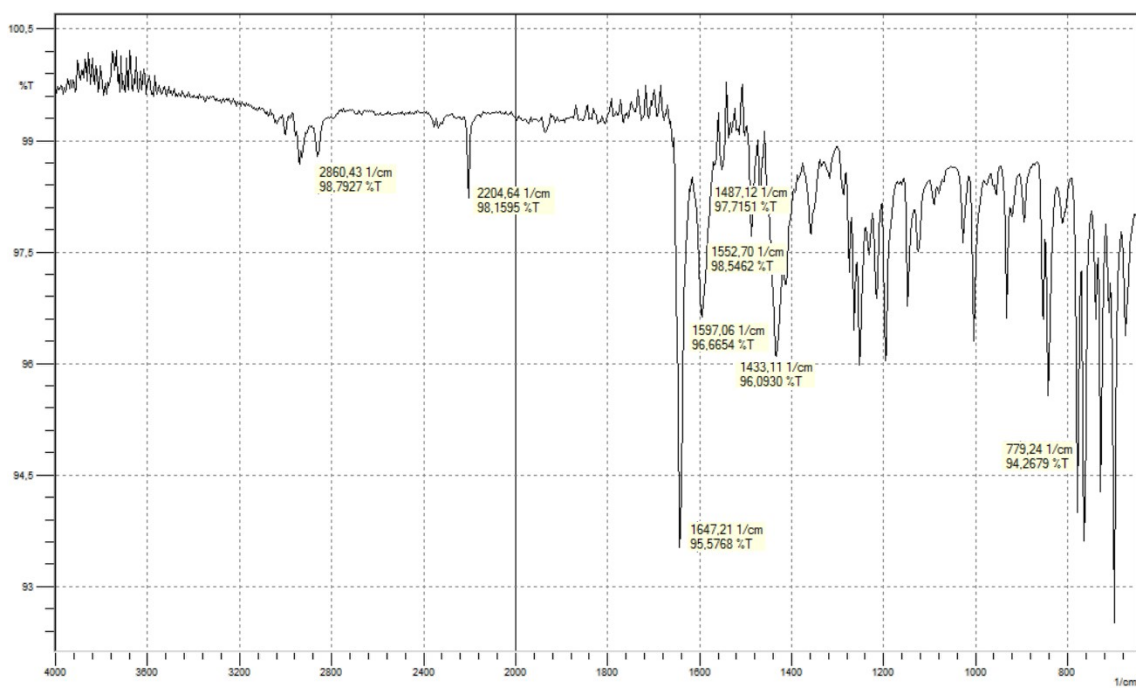



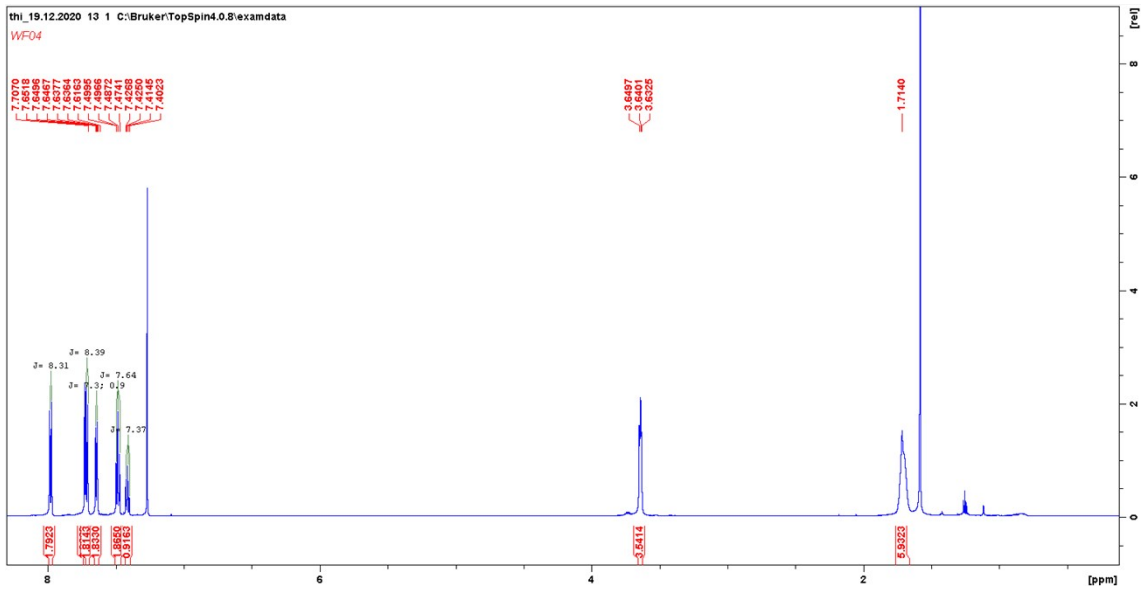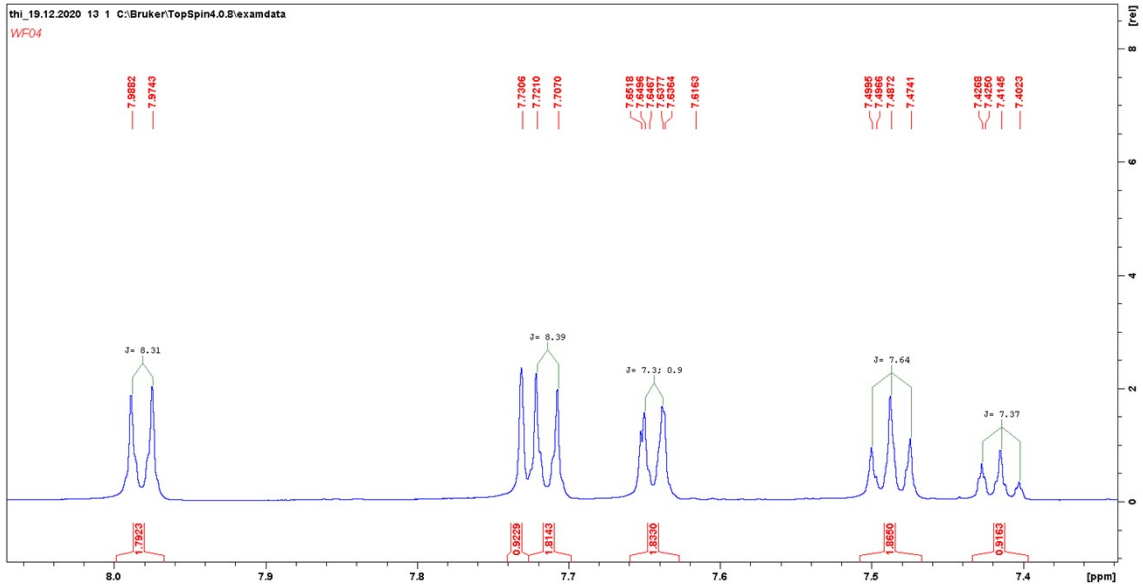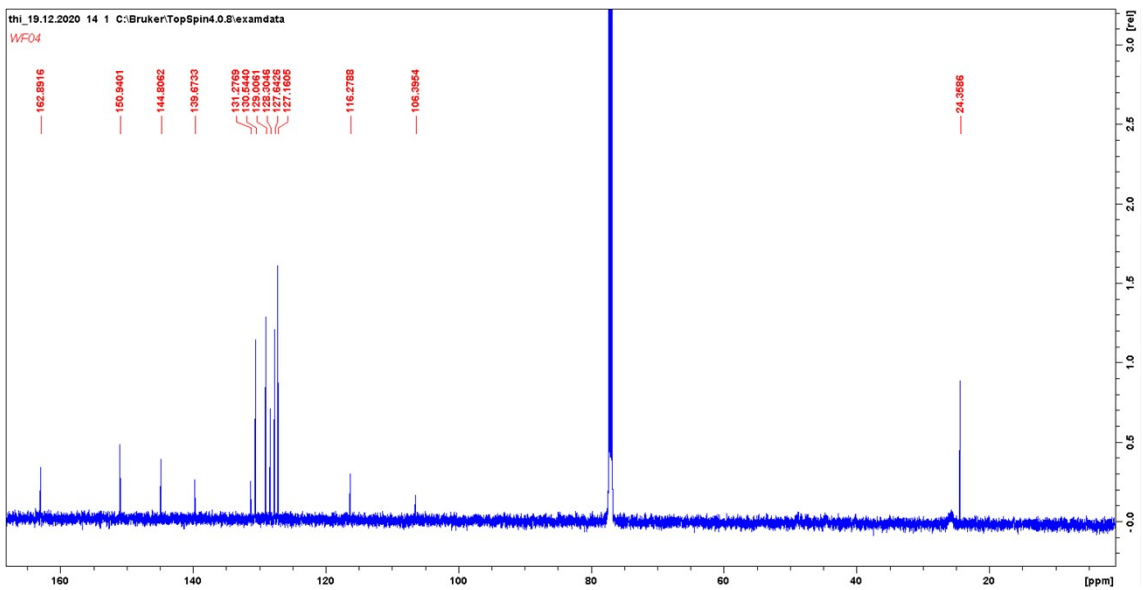

Spectrum1 #Data# WF04.qgd R.Time:25.300(Scan#:2437)  
MassPeaks:254  
RawMode:Averaged 24.733-25.508(2369-2462) BasePeak:314.60(10000)  
BG Mode:Averaged 27.533-27.942(2705-2754) Group 1 - Event 1

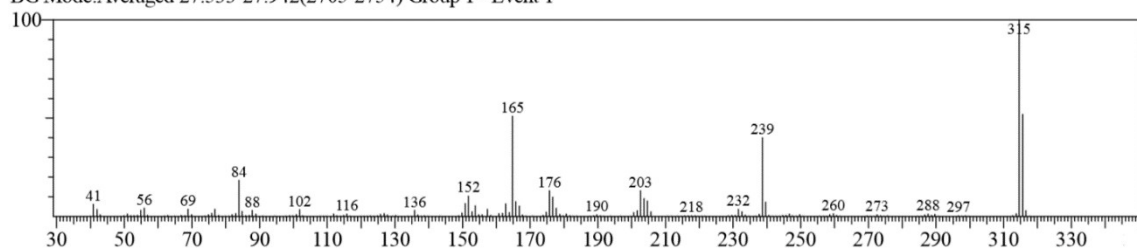

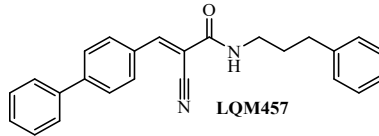

(E)-3-((1,1'-Biphenyl)-4-yl)-2-cyano-N-(3-phenylpropyl)acrylamide  
 Chemical Formula: C<sub>25</sub>H<sub>22</sub>N<sub>2</sub>O  
 Exact Mass: 366.46 g/mol

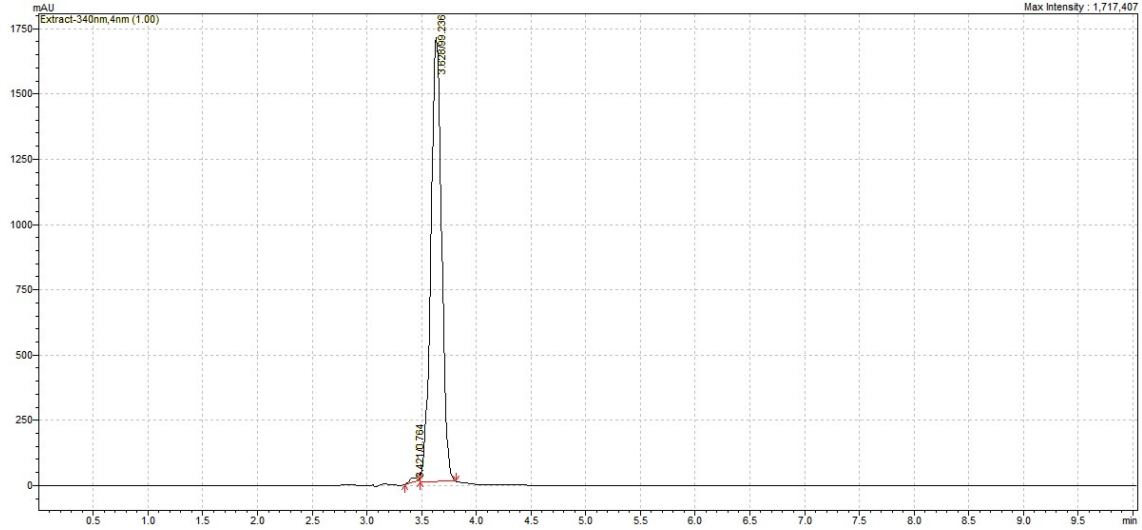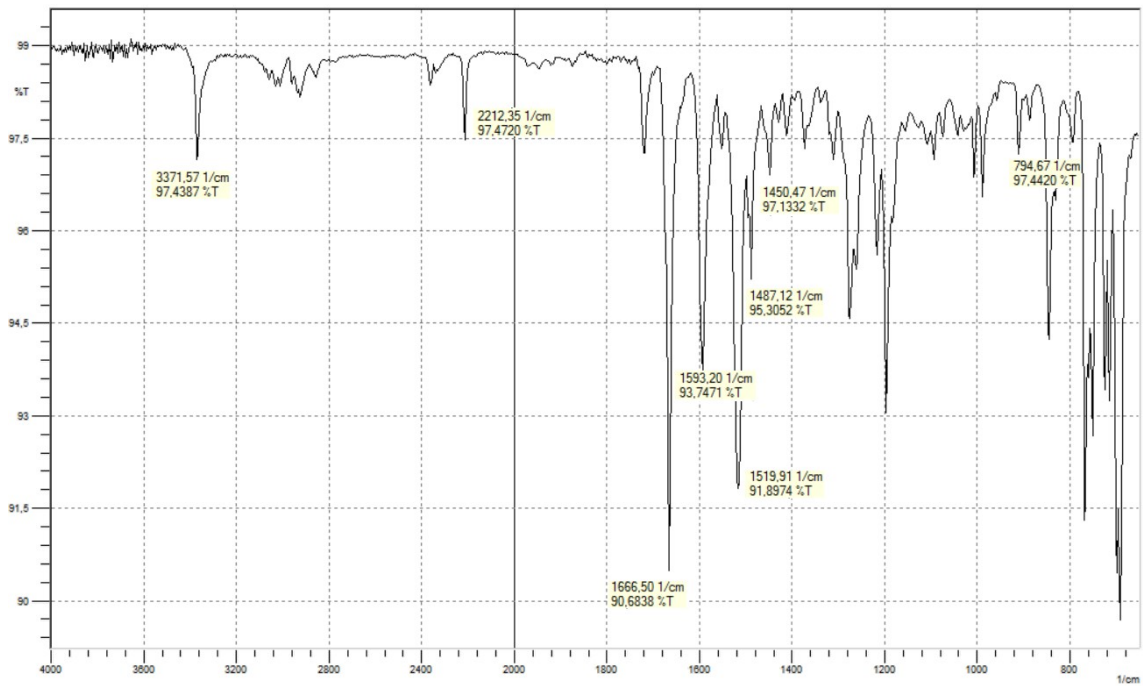

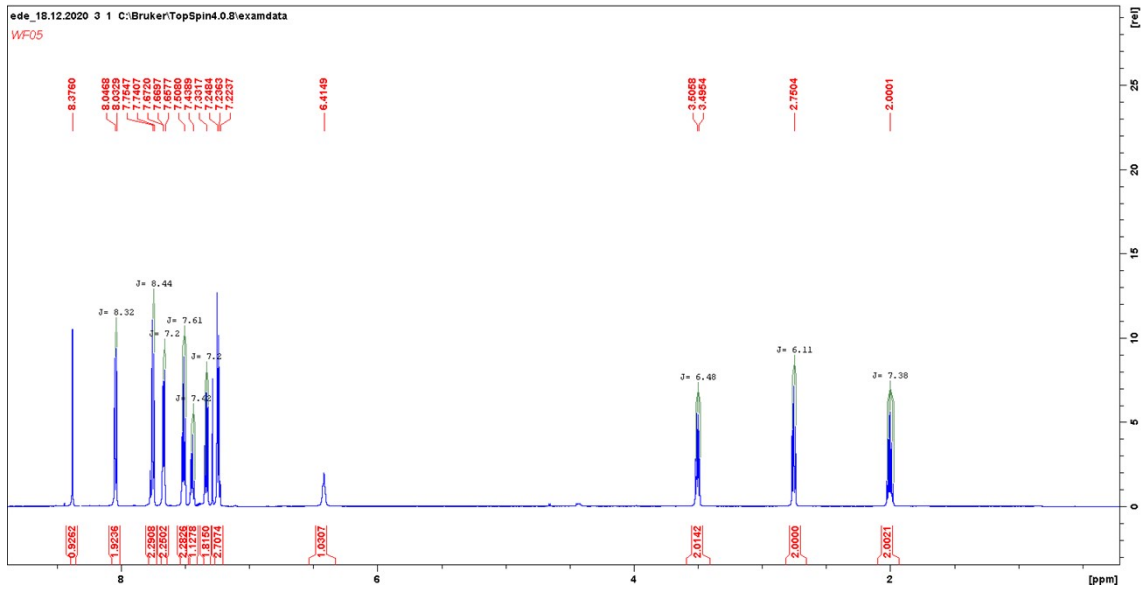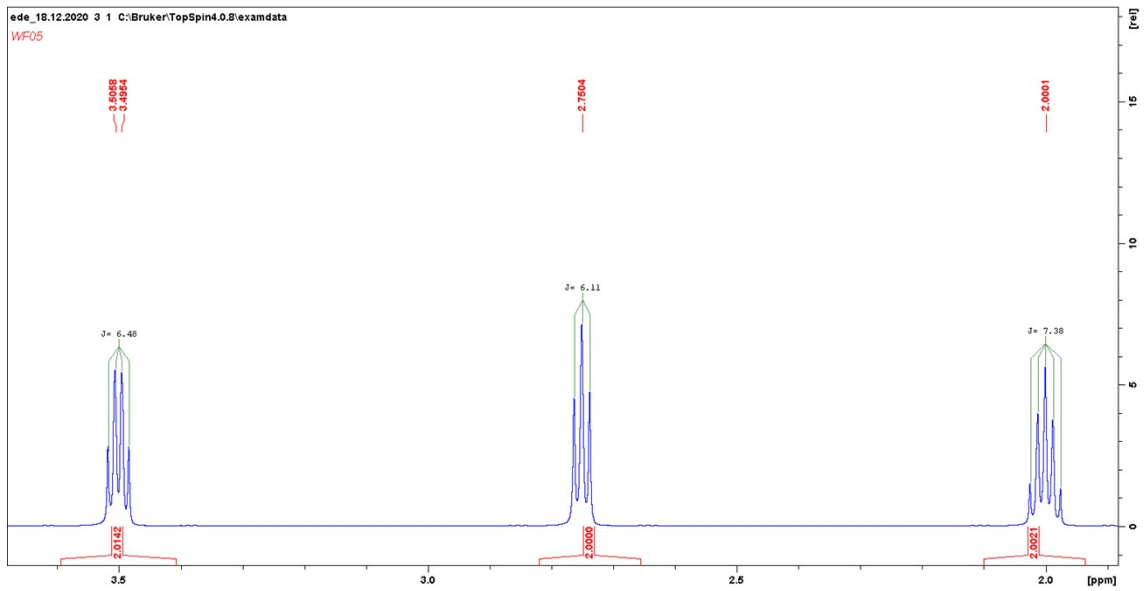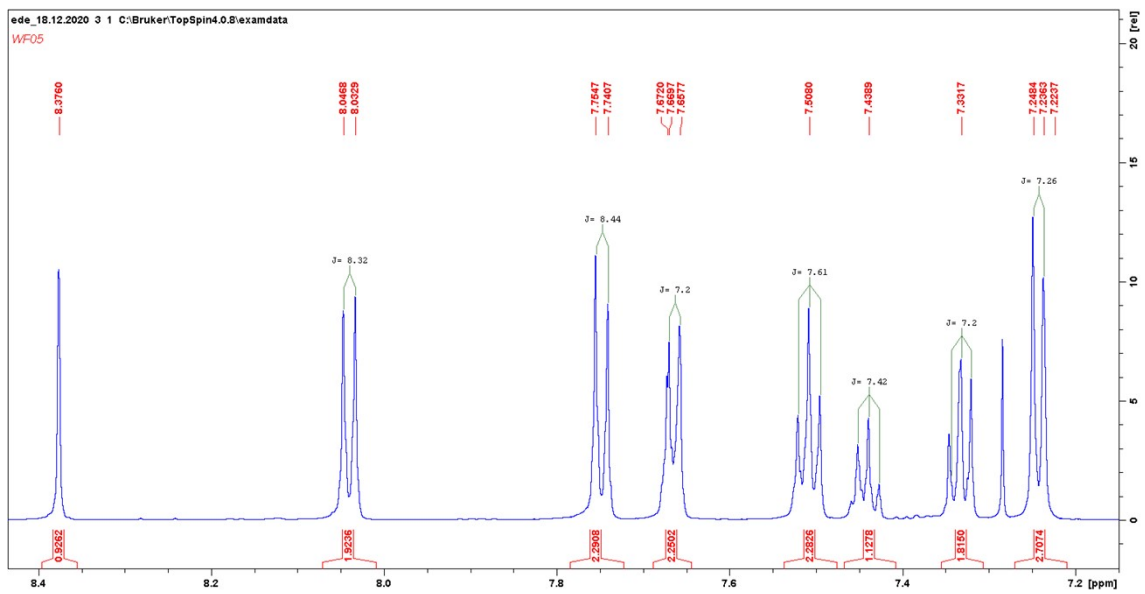

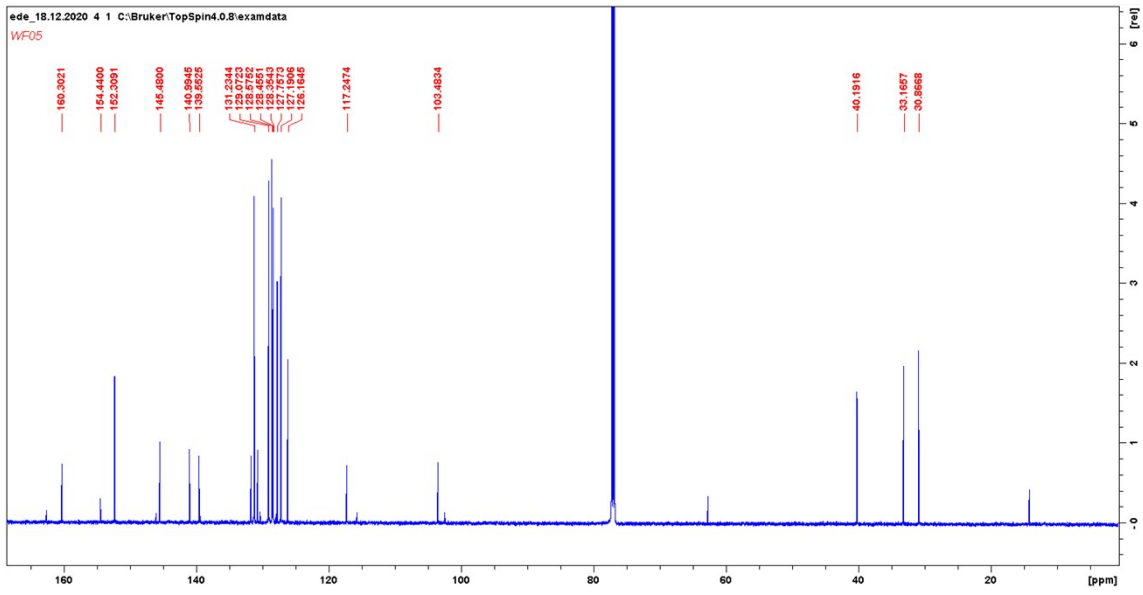

Line#: 1 R.Time:32.183(Scan#:3263)  
MassPeaks:265  
RawMode:Averaged 32.175-32.192(3262-3264) BasePeak:261(2795629)  
BG Mode:Calc. from Peak Group 1 - Event 1 Scan

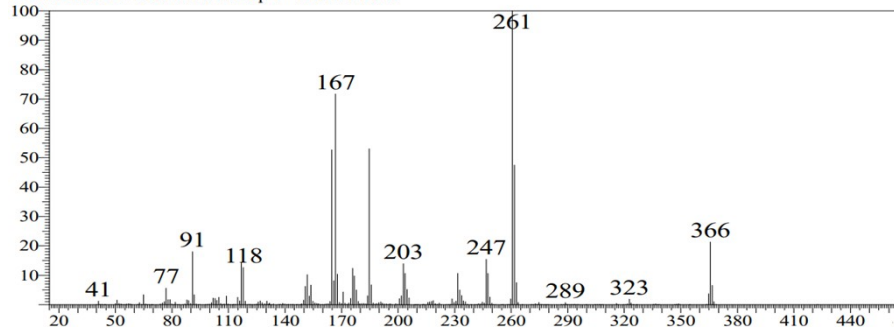

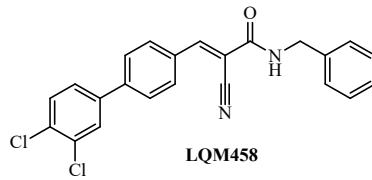

(E)-N-Benzyl-2-cyano-3-(3,4'-dichloro-[1,1'-biphenyl]-4-yl)acrylamide  
 Chemical Formula: C<sub>23</sub>H<sub>16</sub>Cl<sub>2</sub>N<sub>2</sub>O  
 Exact Mass: 406.06 g/mol

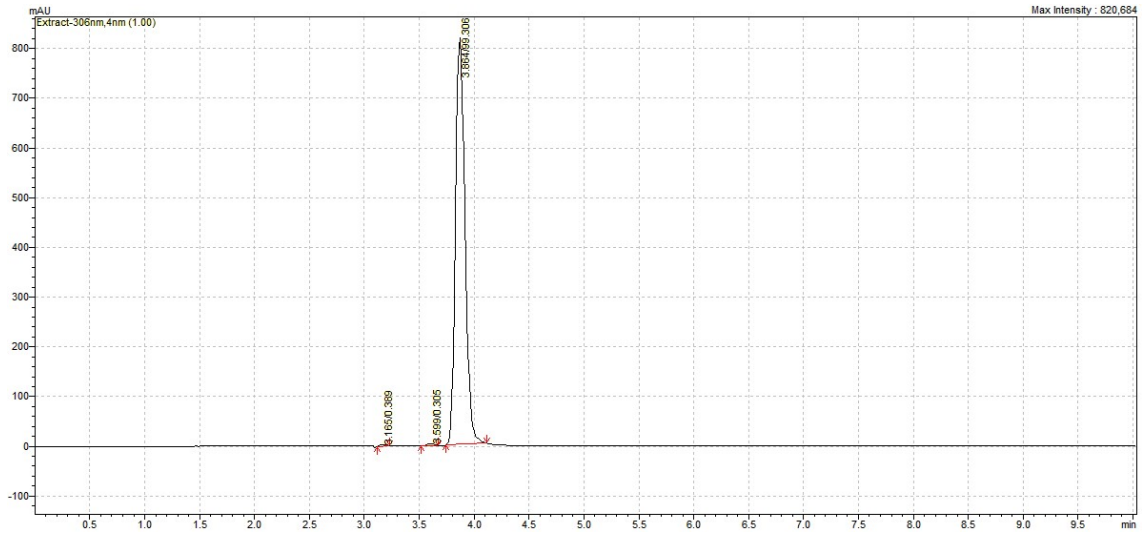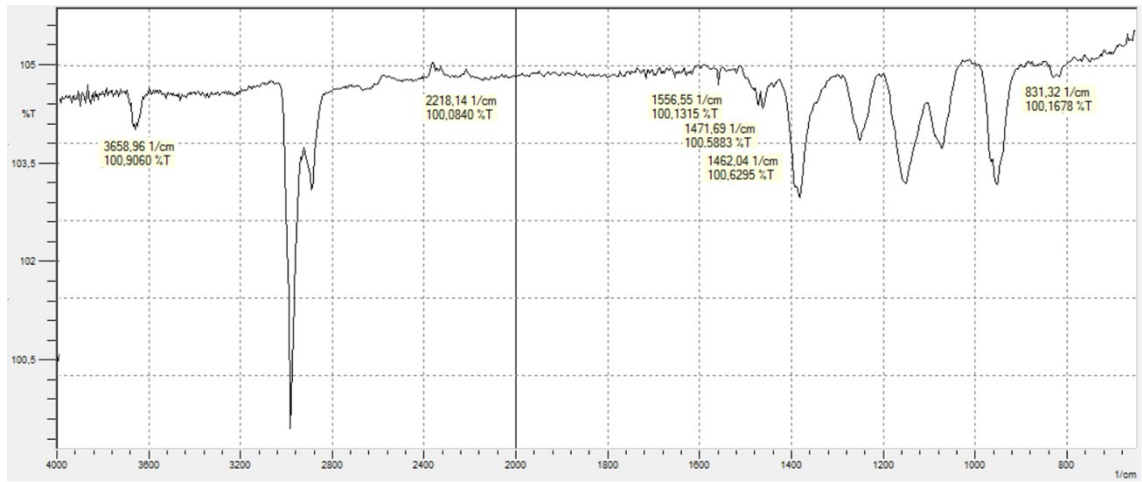

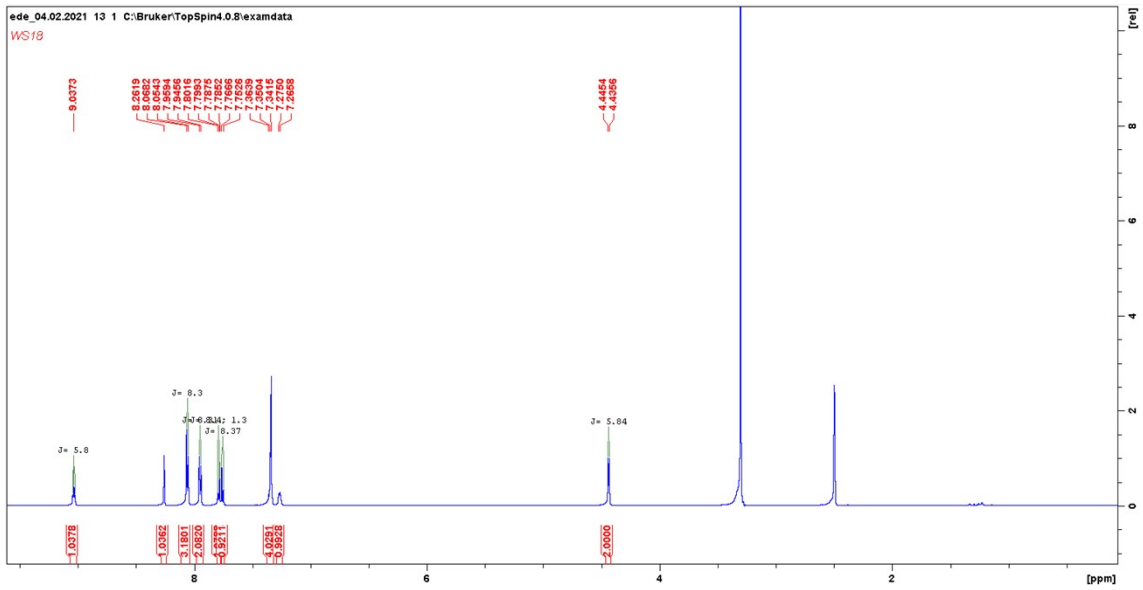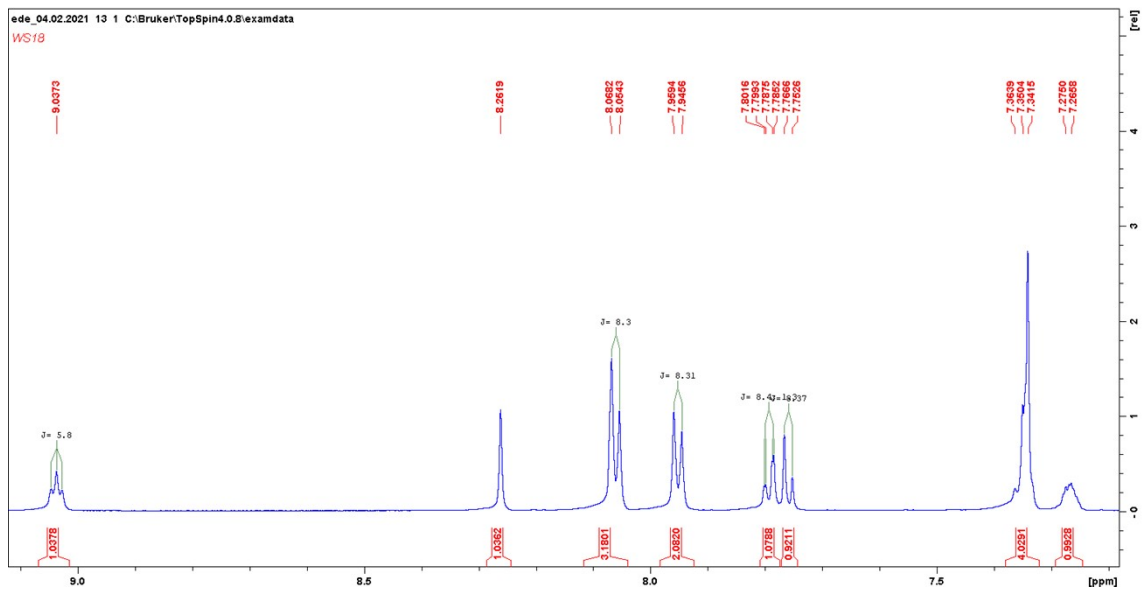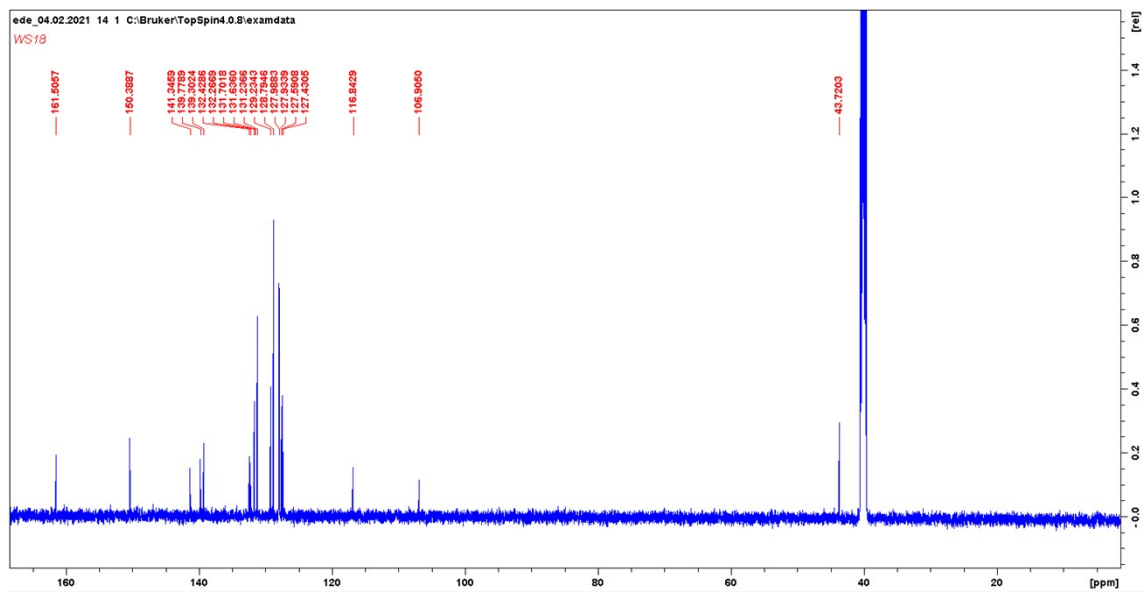

Spectrum1 #Data# WS 18.qgd R.Time:37.633(Scan#:3917)  
MassPeaks:319  
RawMode:Averaged 37.117-37.933(3855-3953) BasePeak:260.70(10000)  
BG Mode:Averaged 35.617-35.983(3675-3719) Group 1 - Event 1

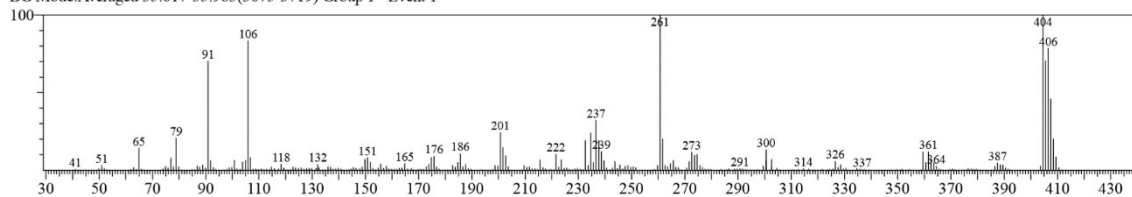



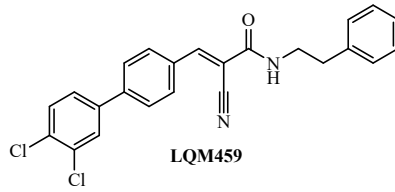

(E)-2-Cyano-3-(3',4'-dichloro-[1,1'-biphenyl]-4-yl)-N-phenethylacrylamide  
 Chemical Formula:  $C_{24}H_{18}Cl_2N_2O$   
 Exact Mass: 421.32 g/mol

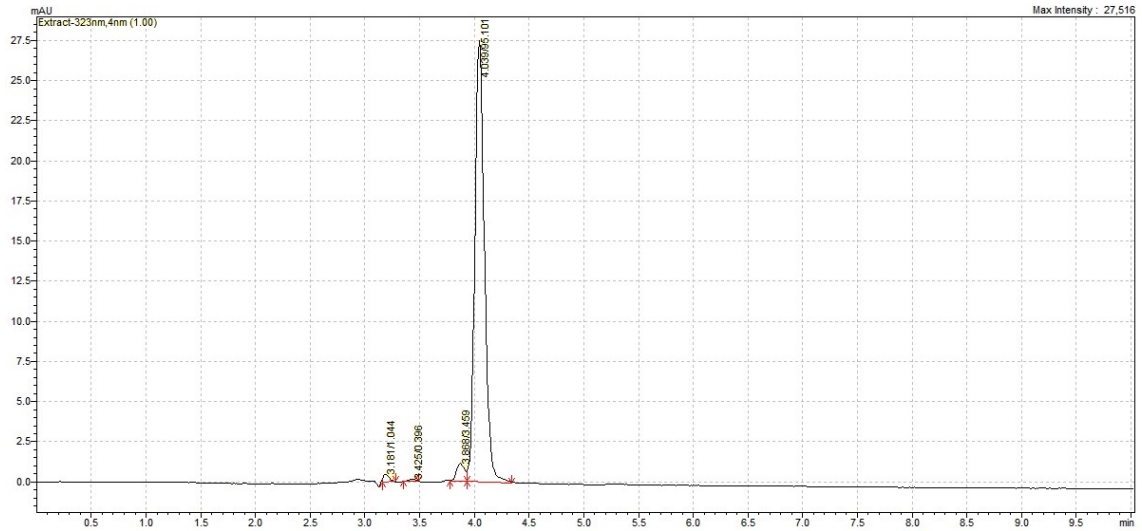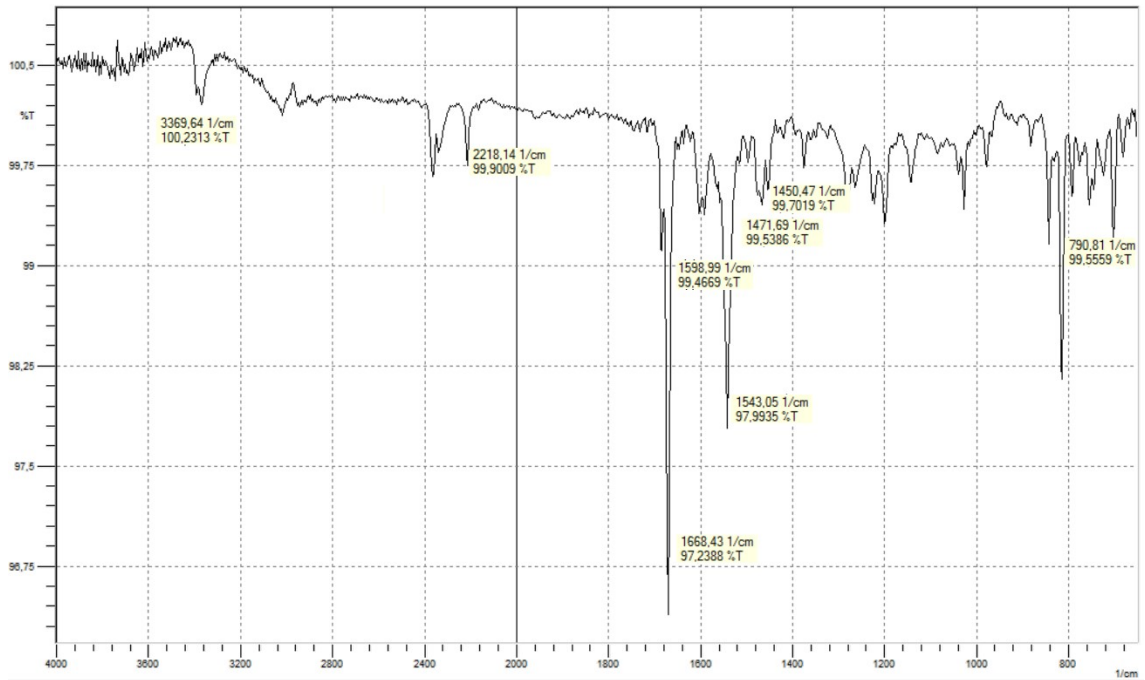

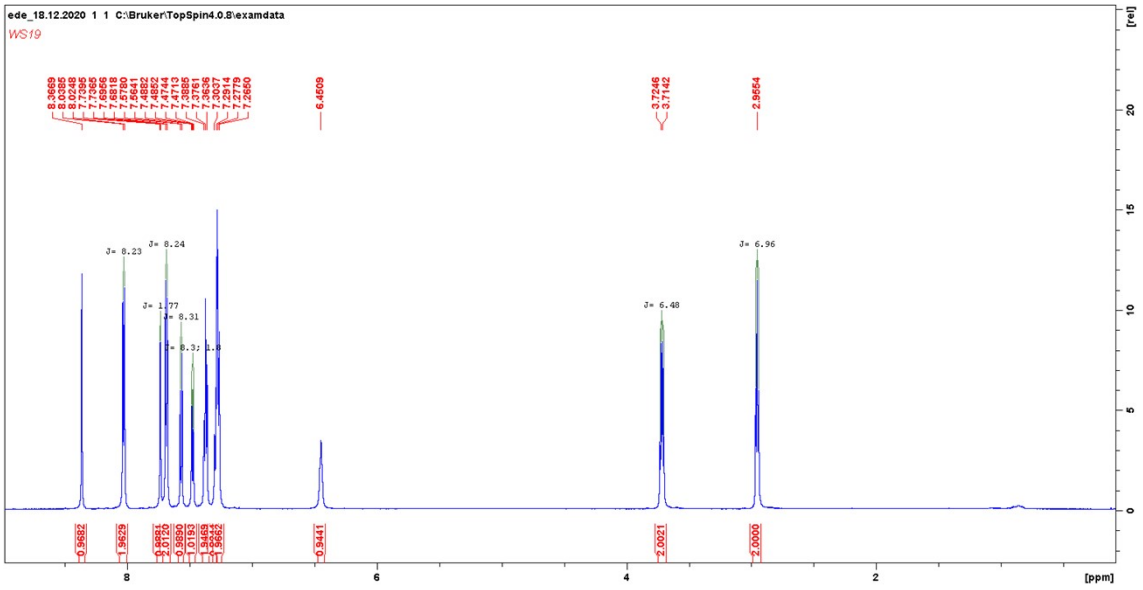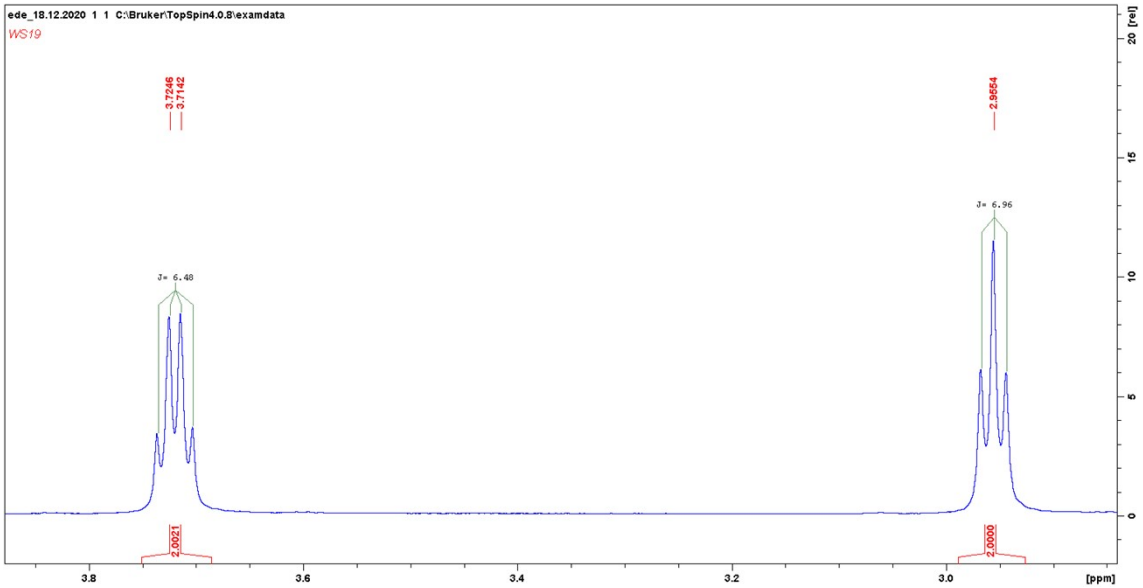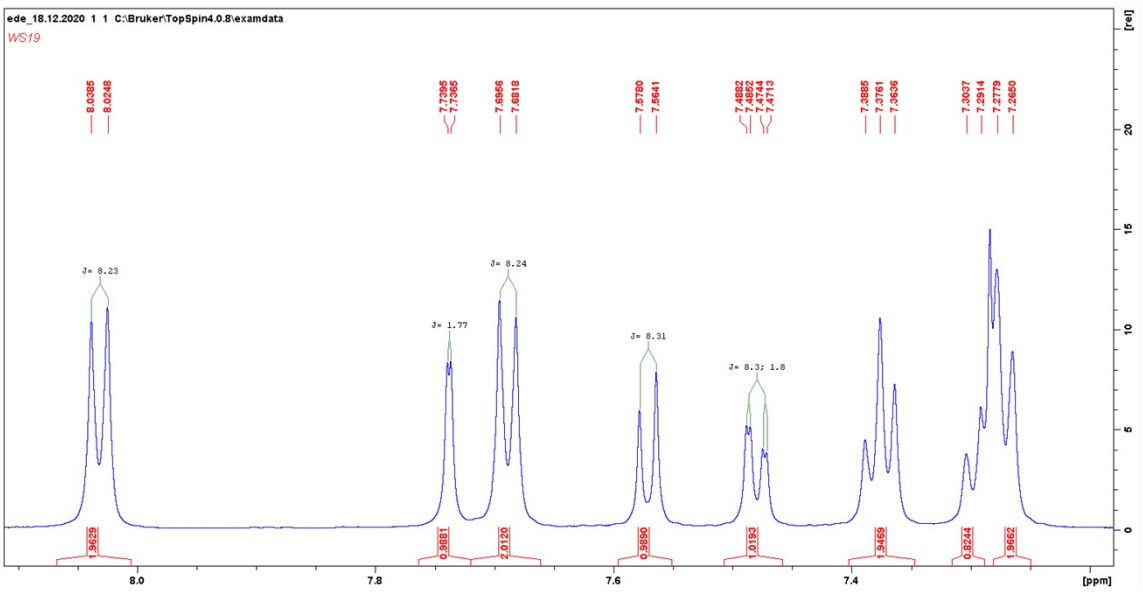

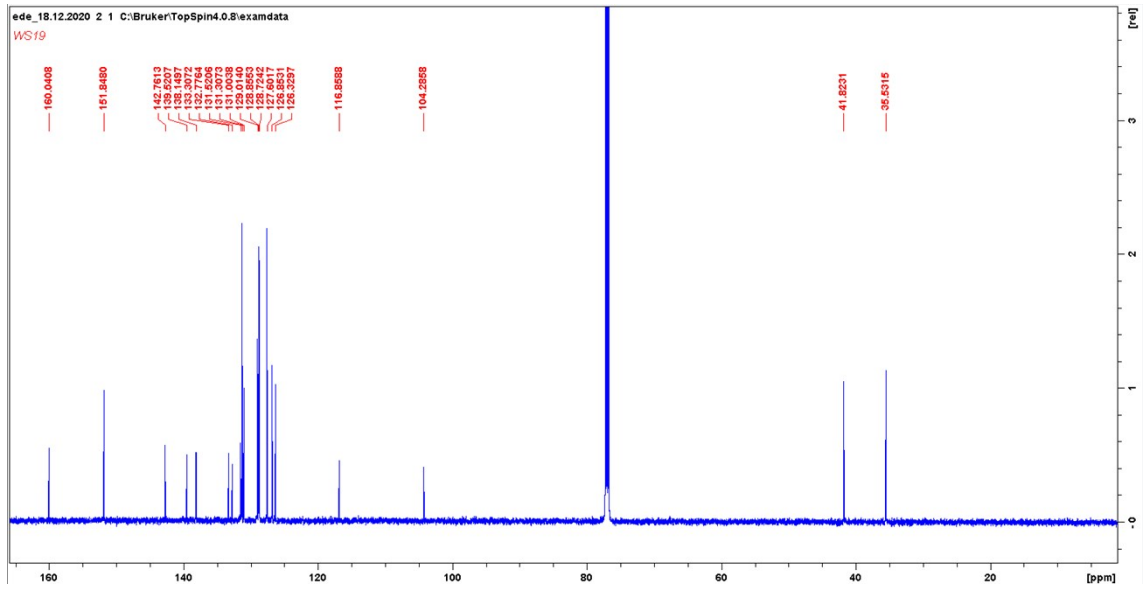

Spectrum1 #Data# WS19.qgd R.Time:41.442(Scan#:4374)  
MassPeaks:259  
RawMode:Averaged 40.242-41.625(4230-4396) BasePeak:103.85(10000)  
BG Mode:Averaged 39.308-39.308(4118-4118) Group 1 - Event 1

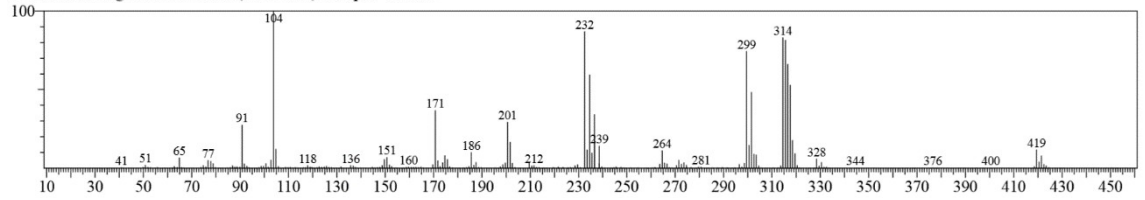

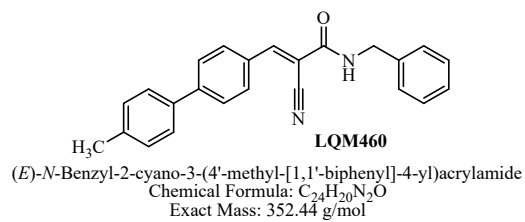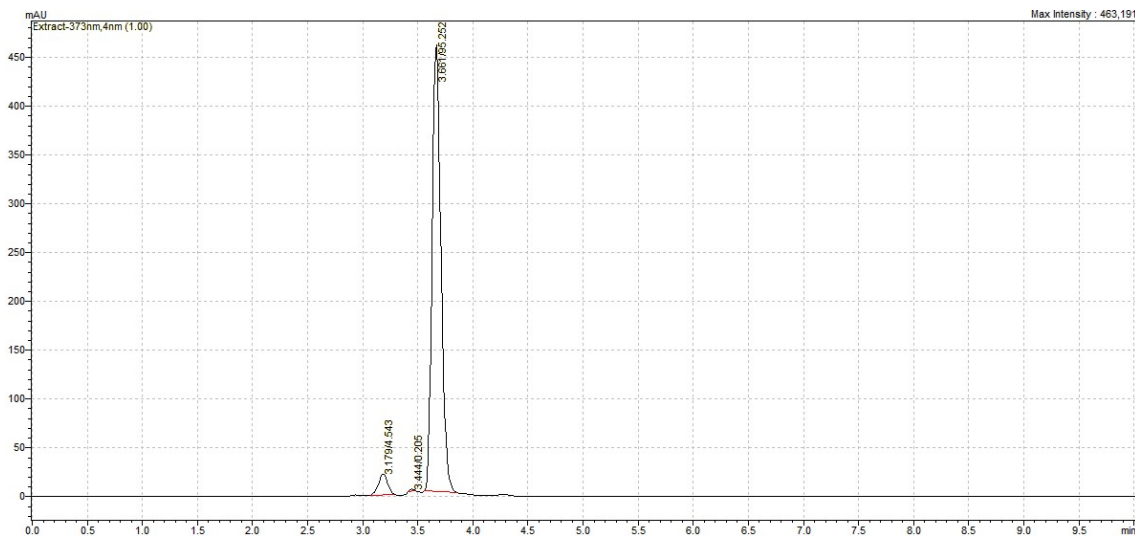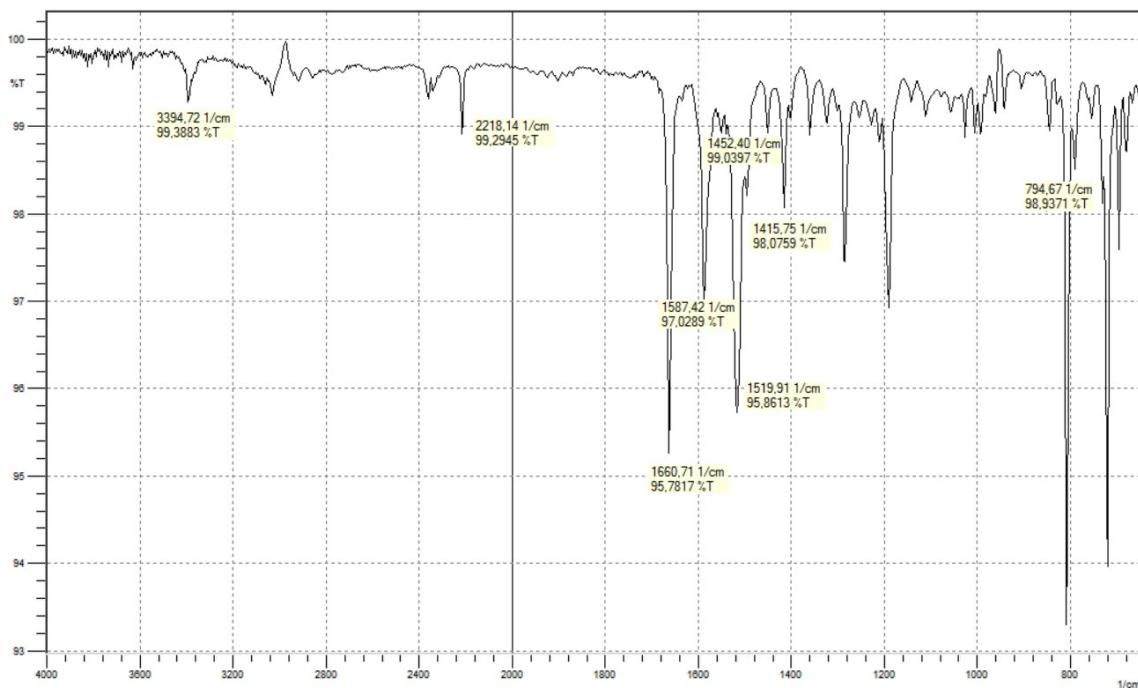

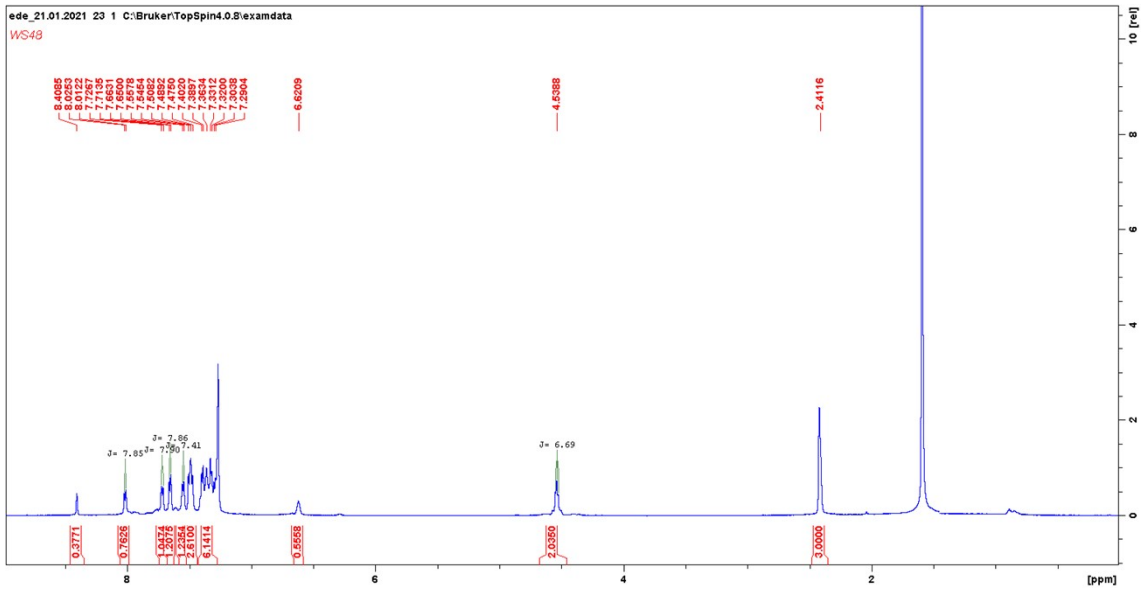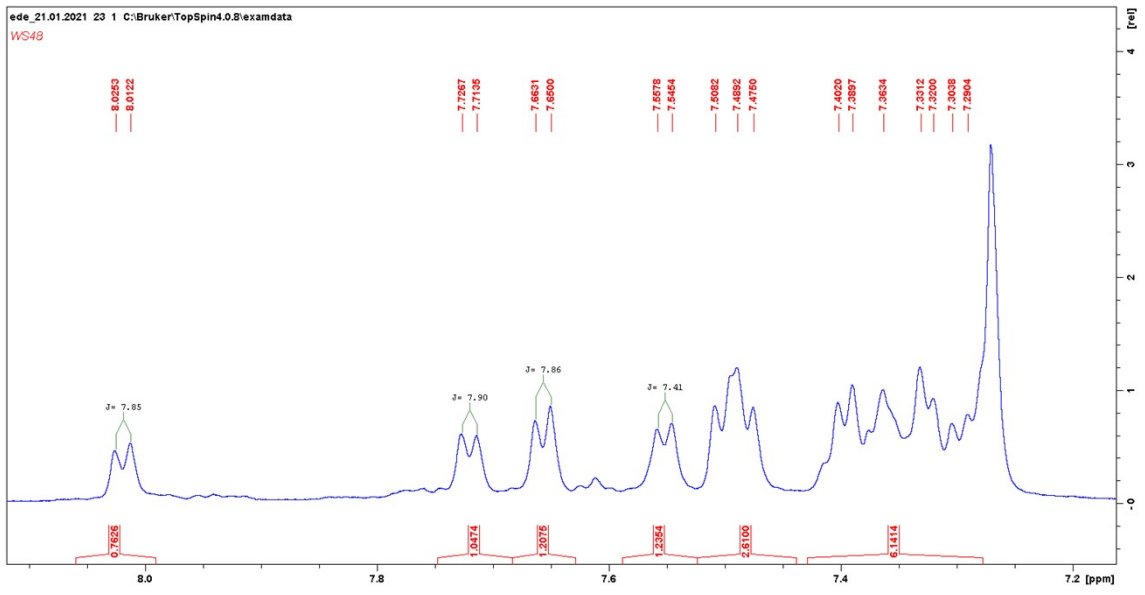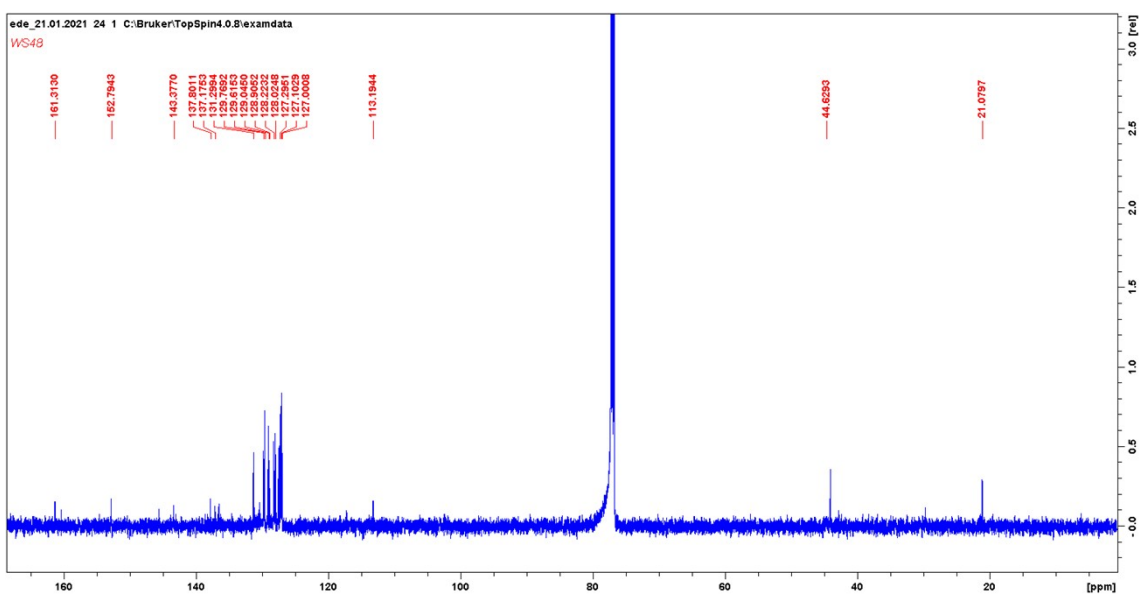

Spectrum1 #Data# WS48 1,029.qgd R.Time:29.458(Scan#:2936)  
MassPeaks:280  
RawMode:Averaged 29.158-30.258(2900-3032) BasePeak:350.65(10000)  
BG Mode:Averaged 31.558-31.558(3188-3188) Group 1 - Event 1

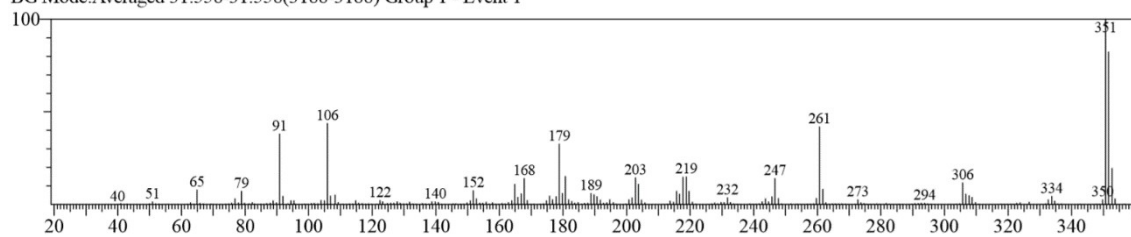

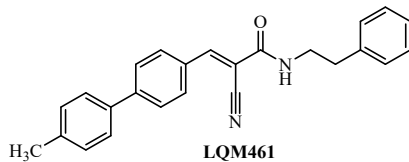

(E)-2-Cyano-3-(4'-methyl-[1,1'-biphenyl]-4-yl)-N-phenethylacrylamide  
 Chemical Formula: C<sub>25</sub>H<sub>27</sub>N<sub>2</sub>O  
 Exact Mass: 366.46 g/mol

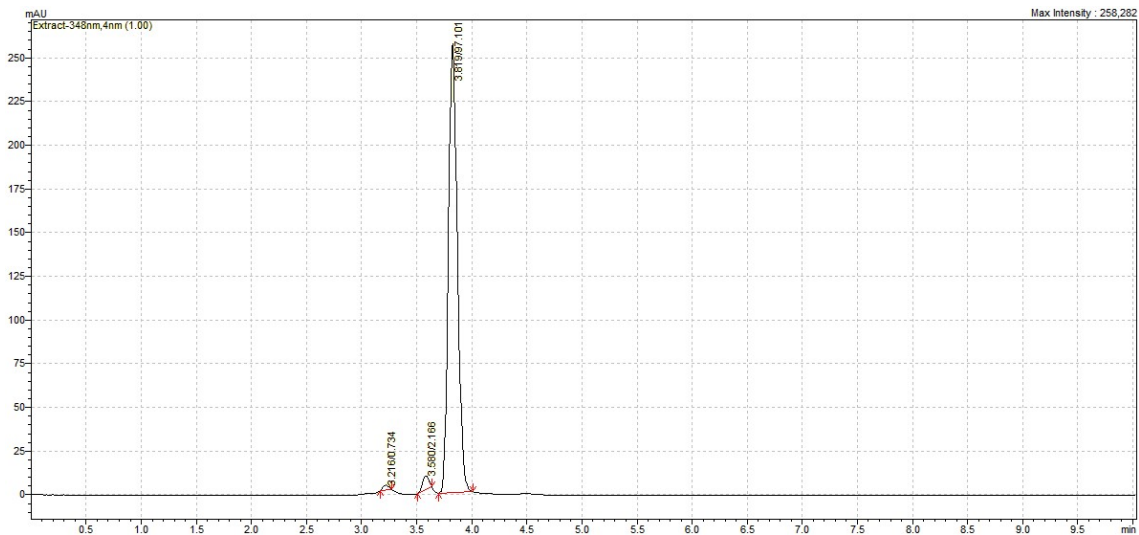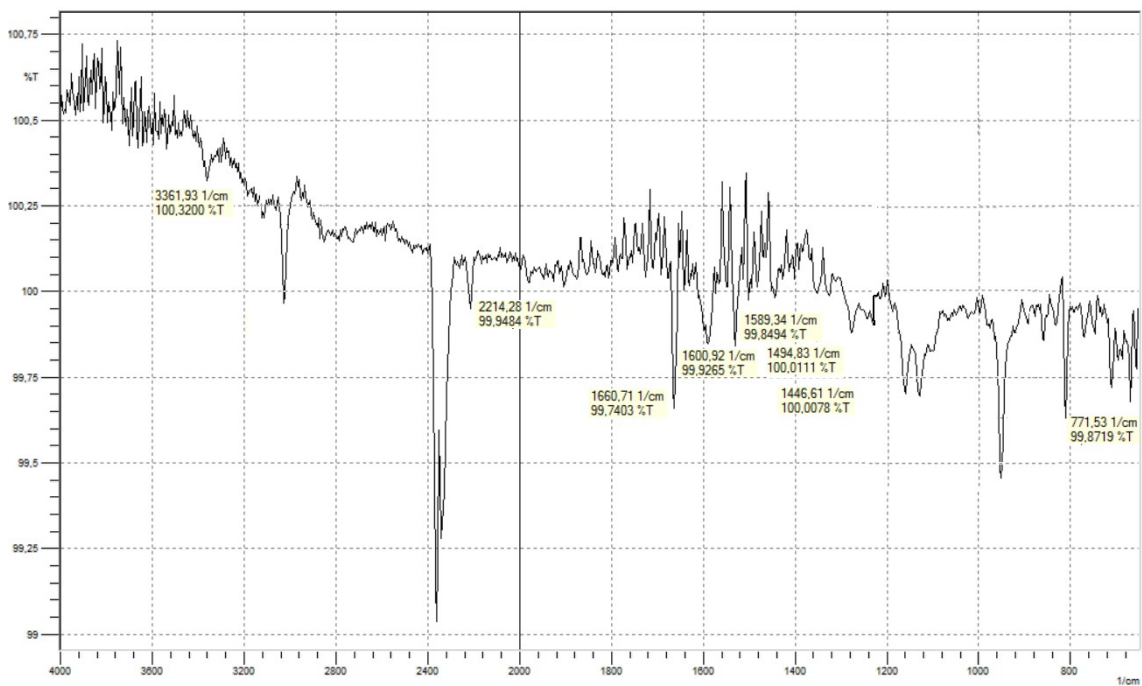

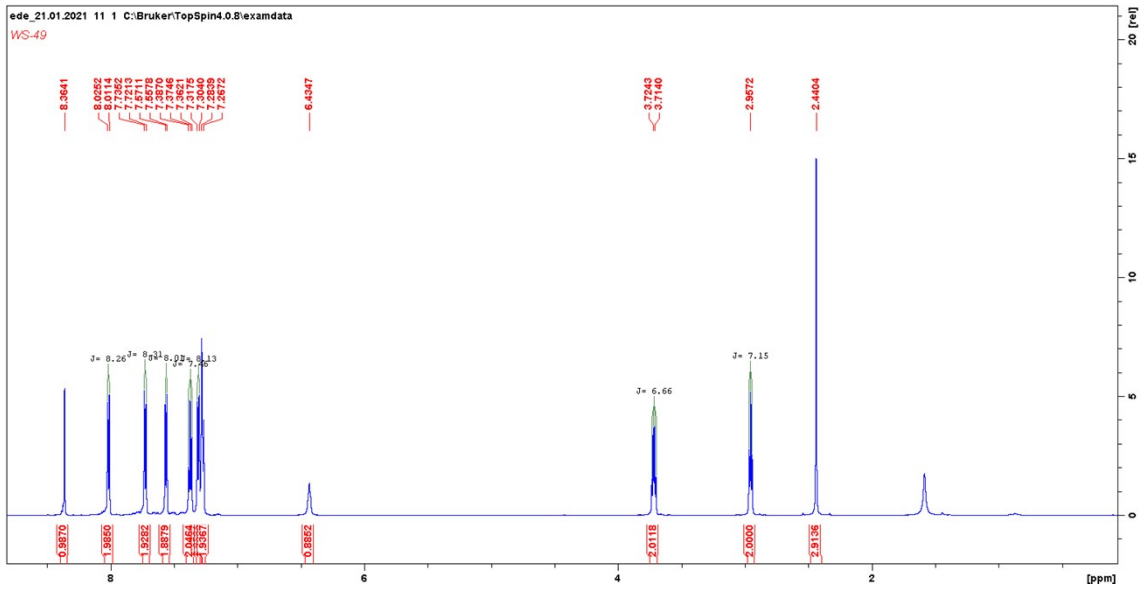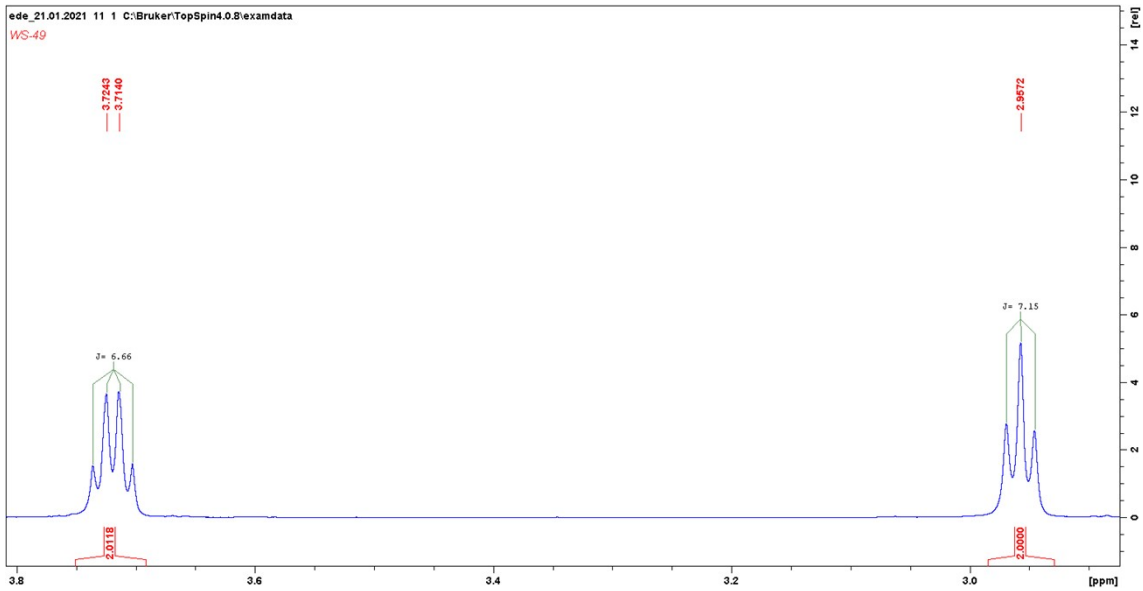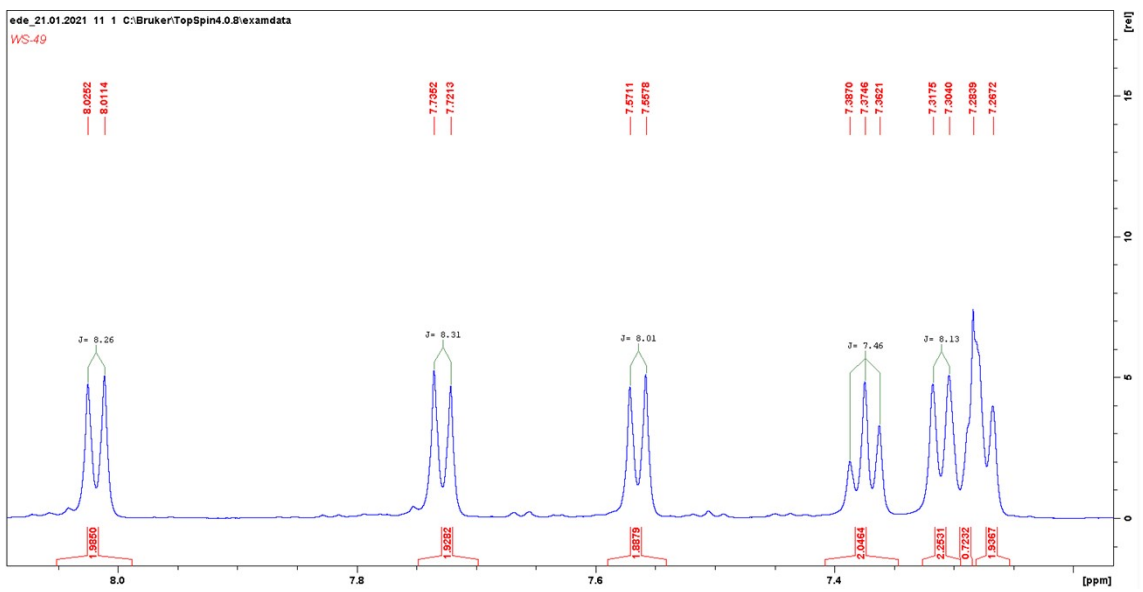



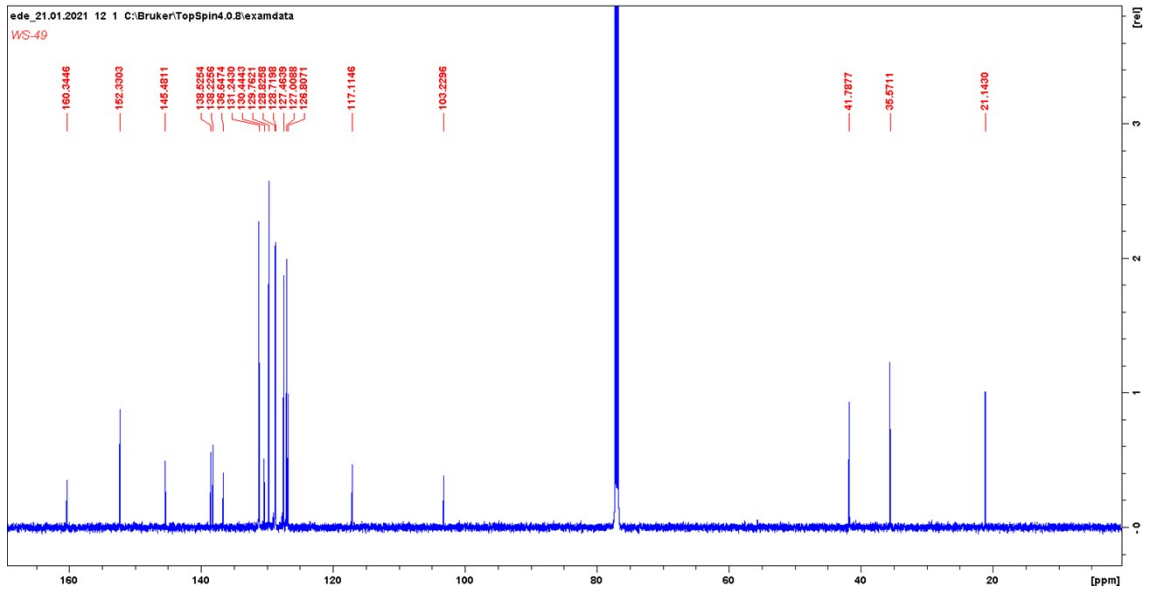

Spectrum1 #Data# WS49.qgd R.Time:31.317(Scan#:3159)  
MassPeaks:215  
RawMode:Averaged 30.925-31.783(3112-3215) BasePeak:178.80(10000)  
BG Mode:Averaged 30.058-30.058(3008-3008) Group 1 - Event 1

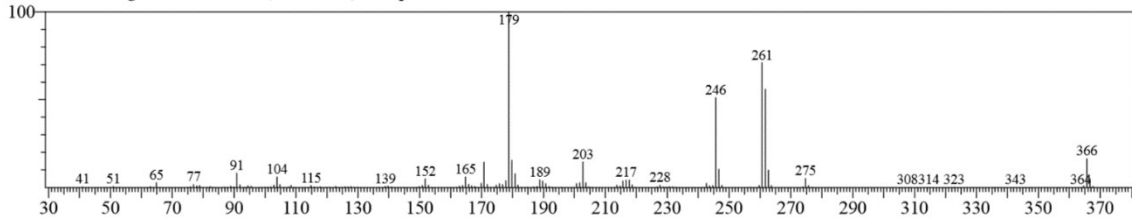

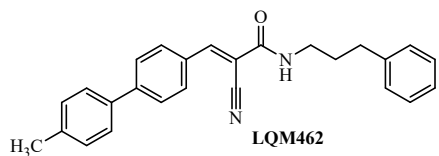

(E)-2-Cyano-3-(4'-methyl-[1,1'-biphenyl]-4-yl)-N-(3-phenylpropyl)acrylamide  
 Chemical Formula: C<sub>26</sub>H<sub>24</sub>N<sub>2</sub>O  
 Exact Mass: 380.49 g/mol

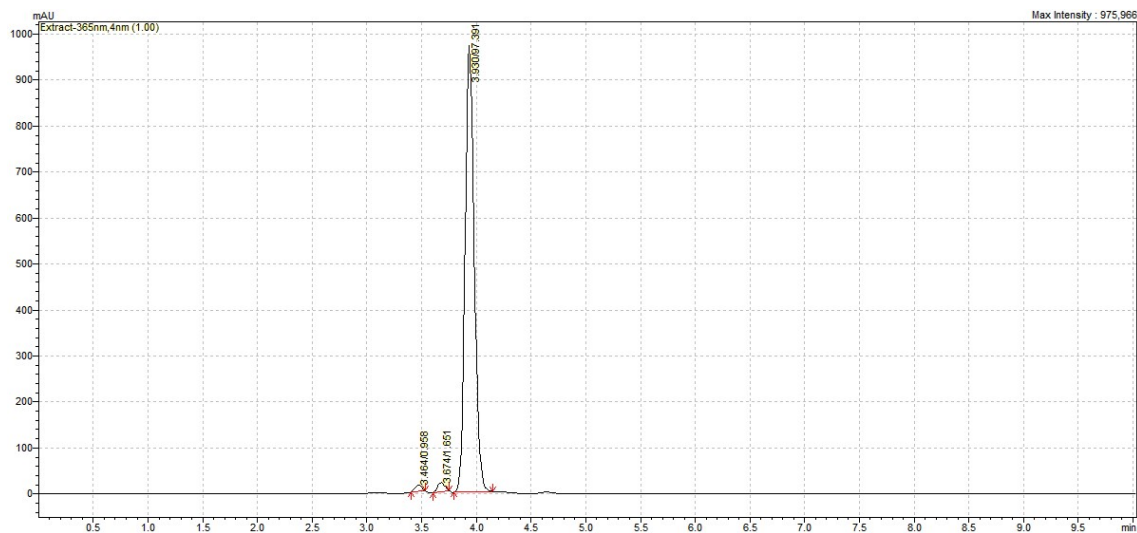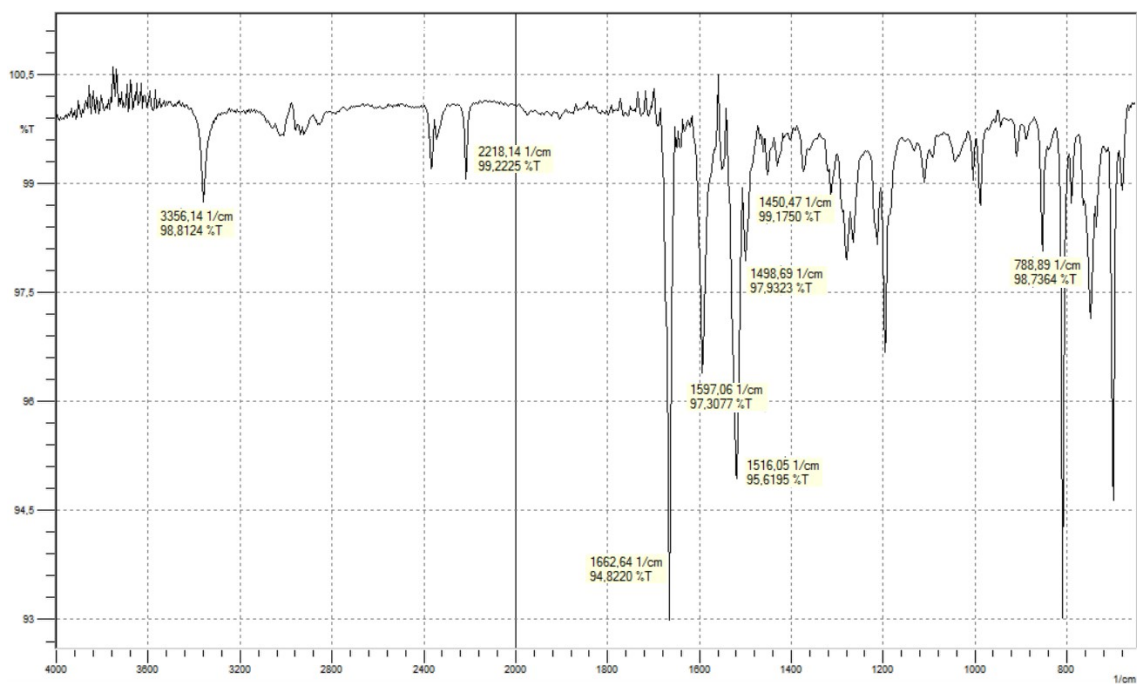

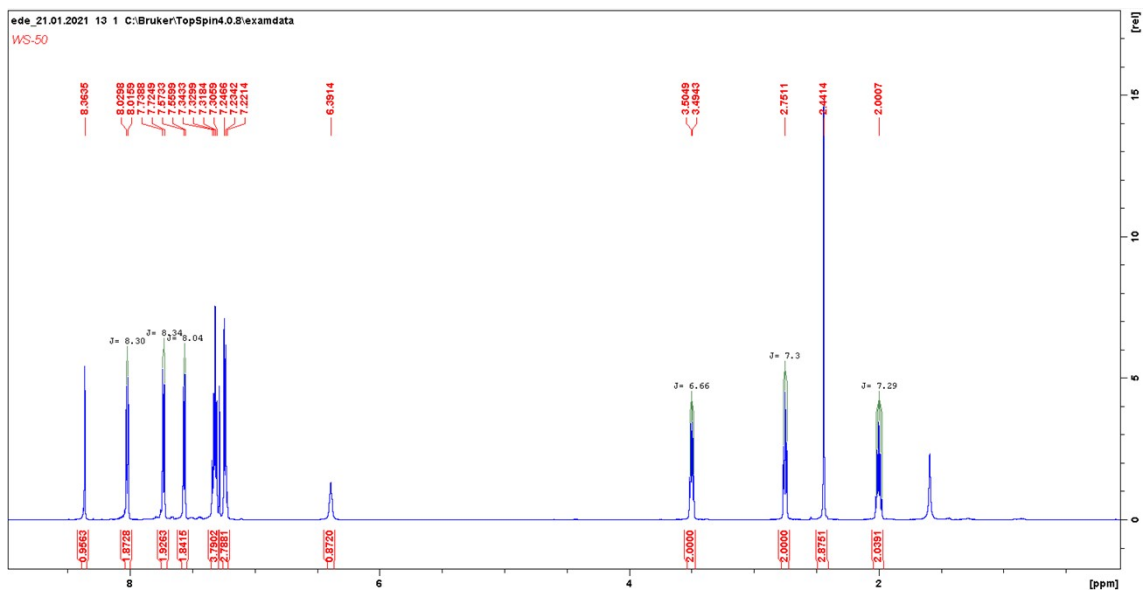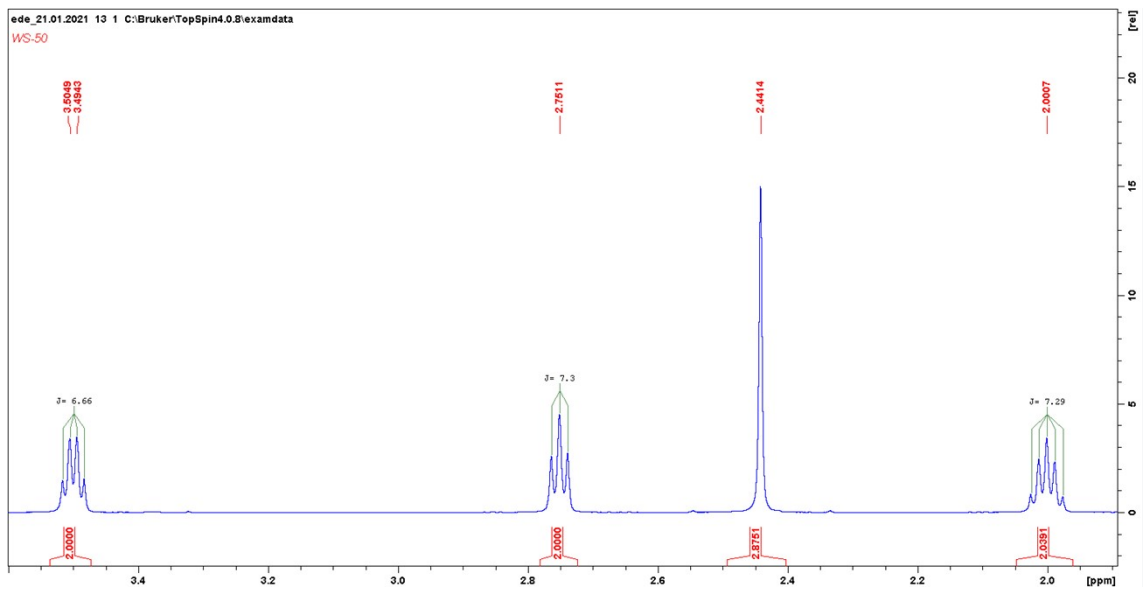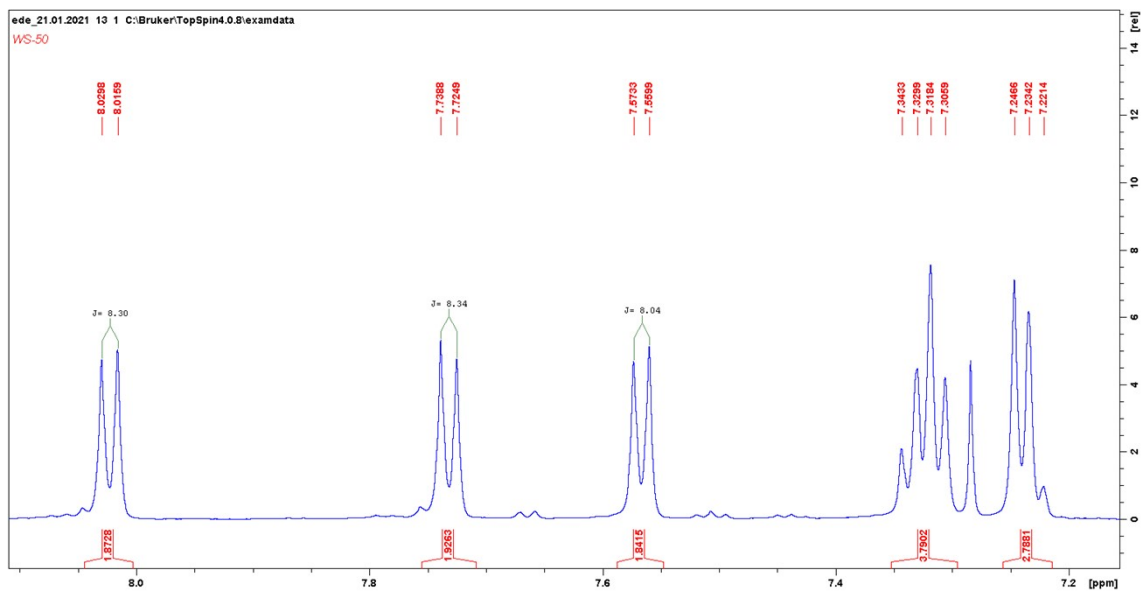

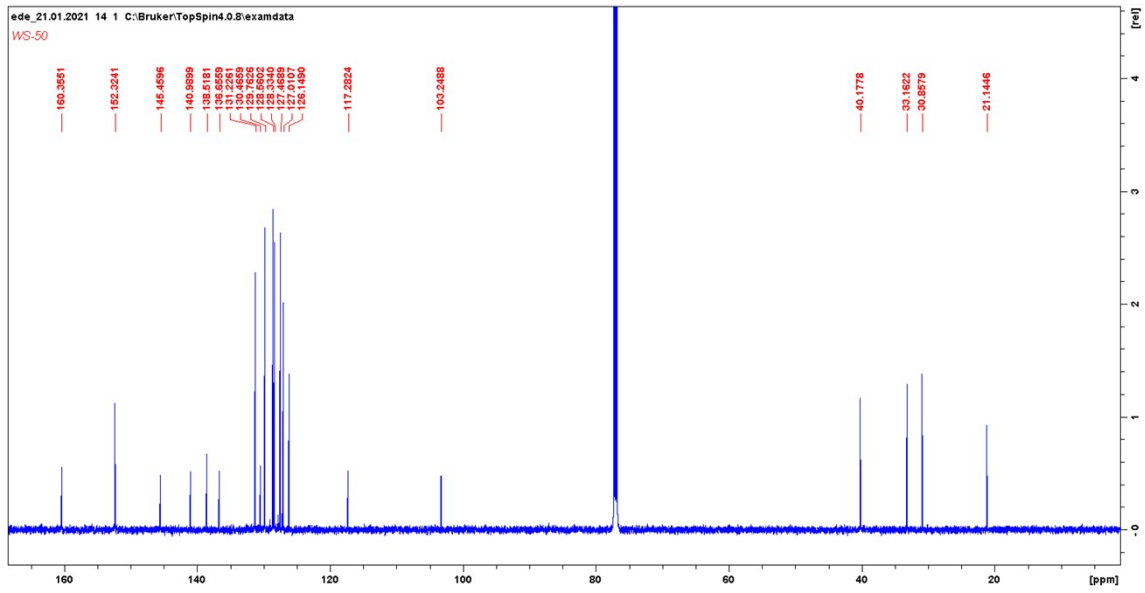

Spectrum1 #Data# WS50.qgd R.Time:35.875(Scan#:3706)  
MassPeaks:290  
RawMode:Averaged 34.058-36.325(3488-3760) BasePeak:274.60(10000)  
BG Mode:Averaged 37.633-37.633(3917-3917) Group 1 - Event 1

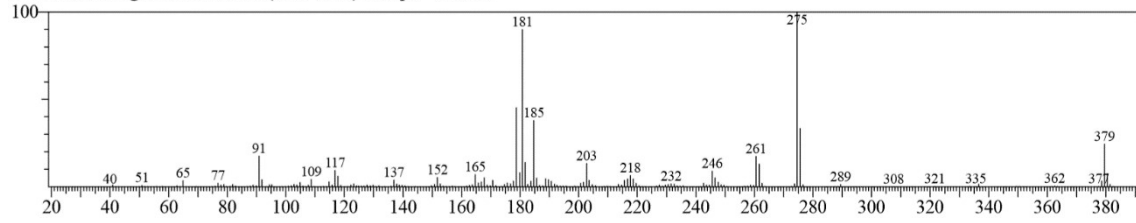

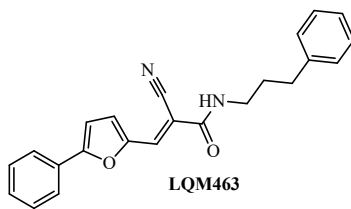

(E)-2-Cyano-3-(5-phenylfuran-2-yl)-N-(3-phenylpropyl)acrylamide  
 Chemical Formula: C<sub>23</sub>H<sub>20</sub>N<sub>2</sub>O<sub>2</sub>  
 Exact Mass: 356.43 g/mol

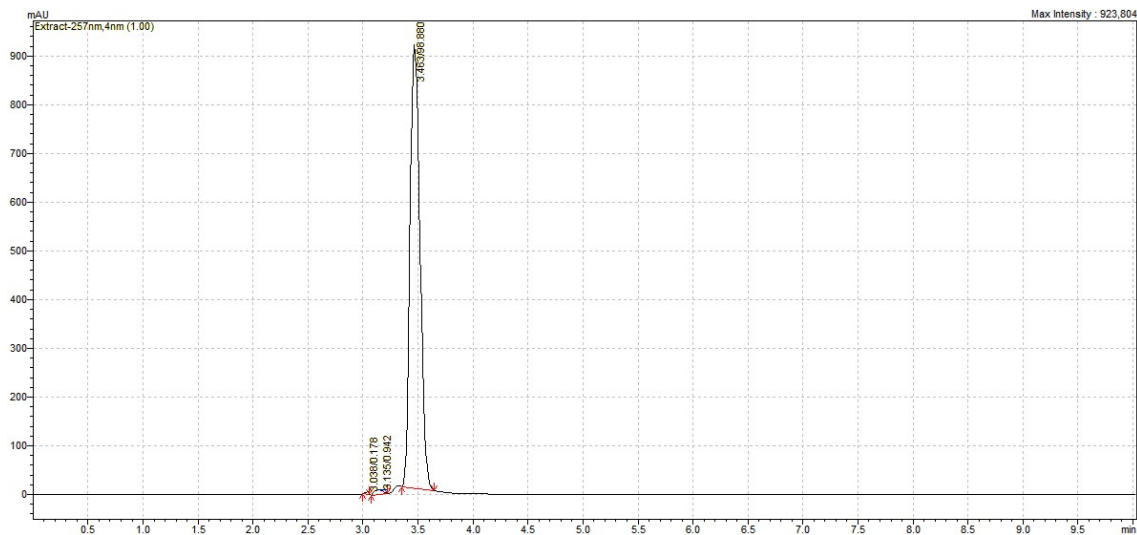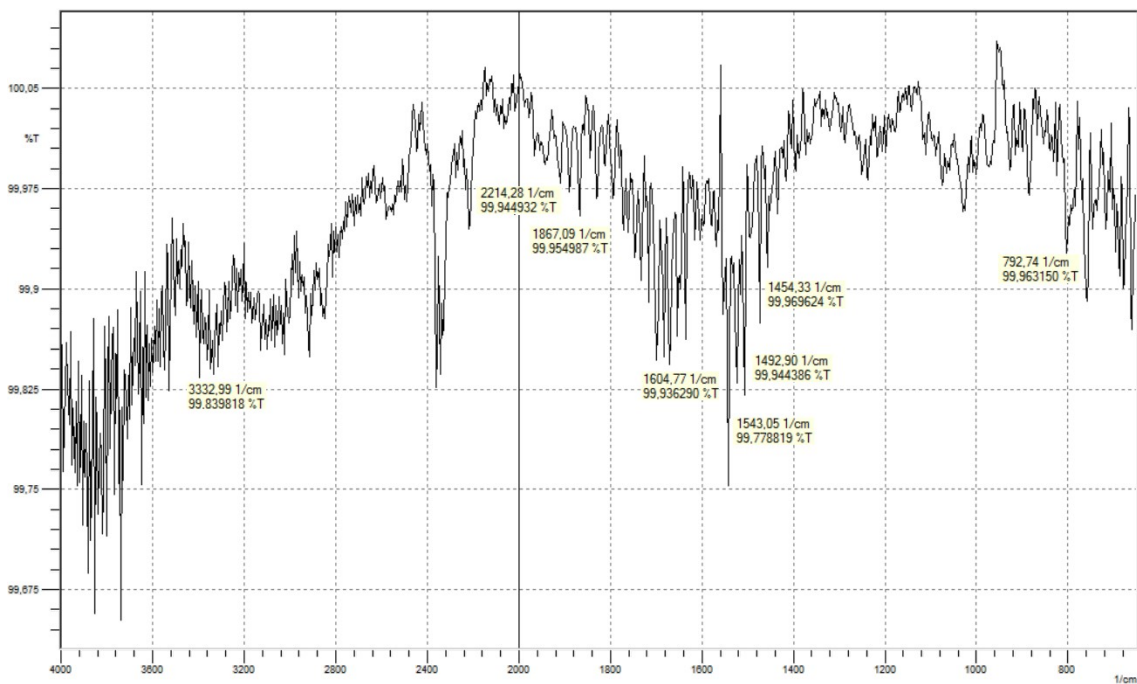

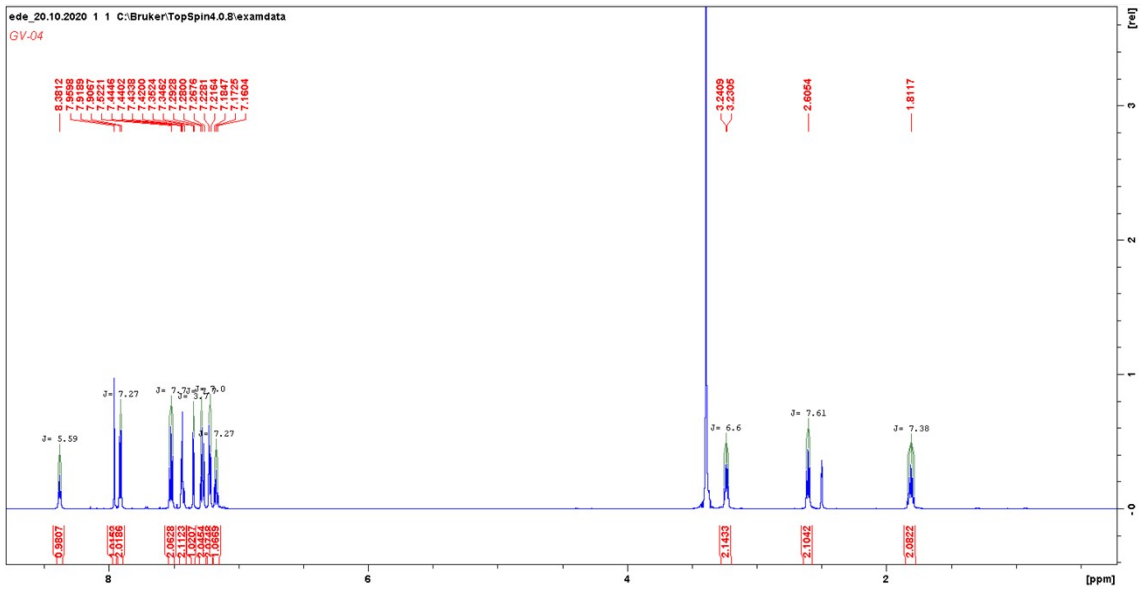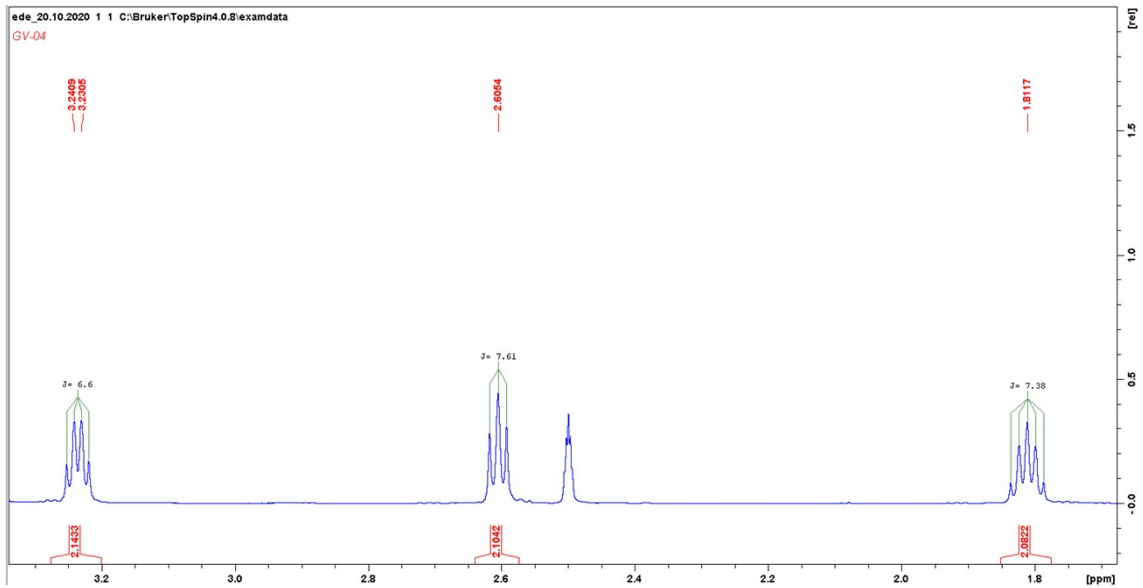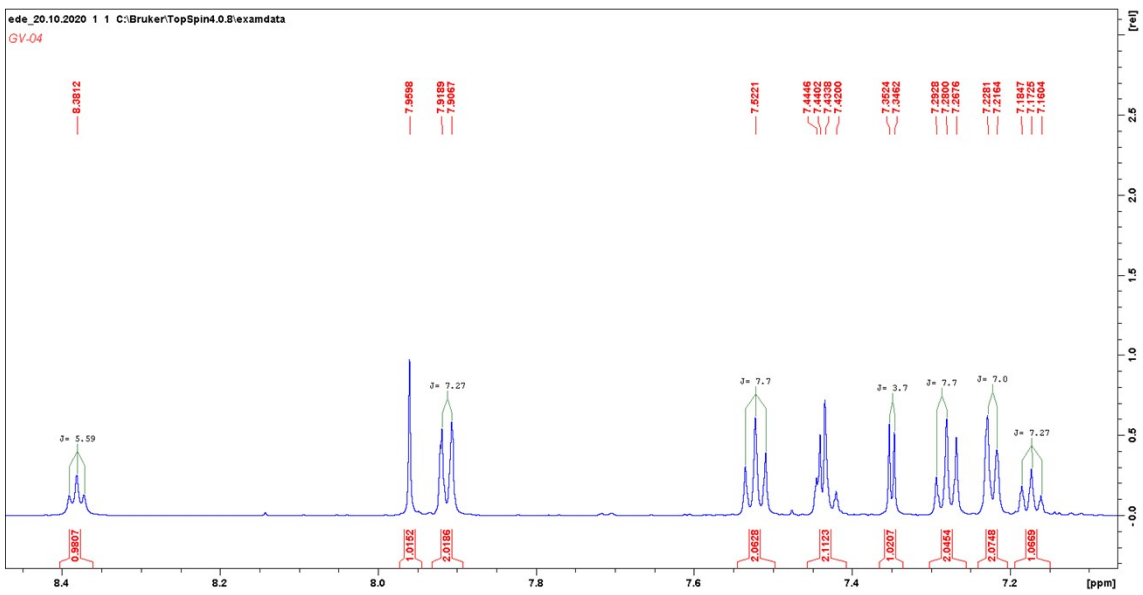

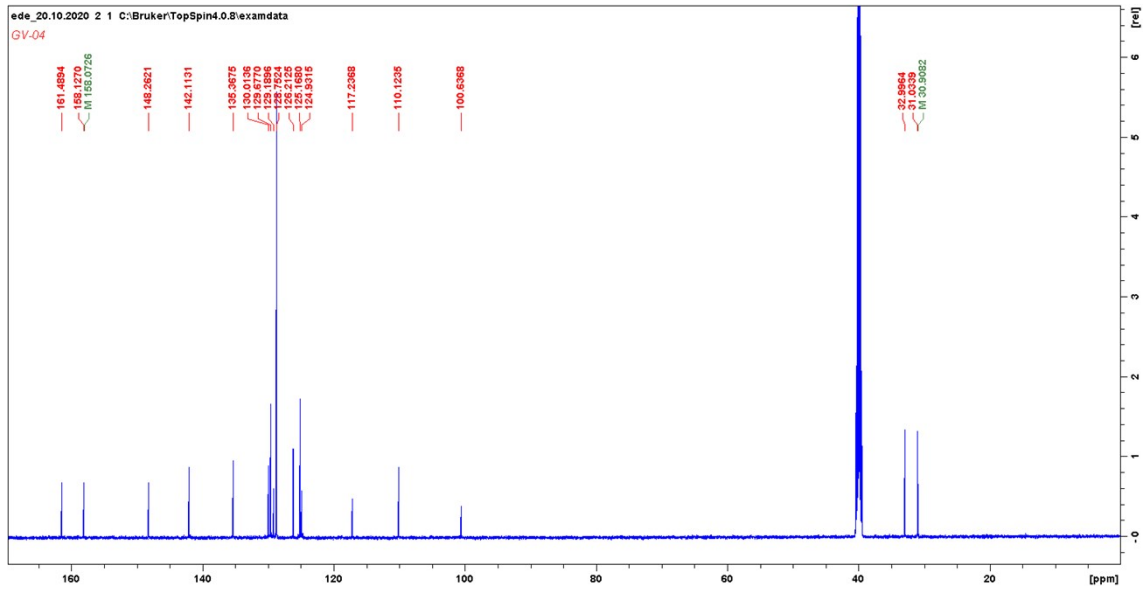

Spectrum1 #Data# GV04.qgd R.Time:28.892(Scan#:2868)  
 MassPeaks:279  
 RawMode:Averaged 28.275-29.342(2794-2922) BasePeak:156.80(10000)  
 BG Mode:Averaged 30.958-30.958(3116-3116) Group 1 - Event 1

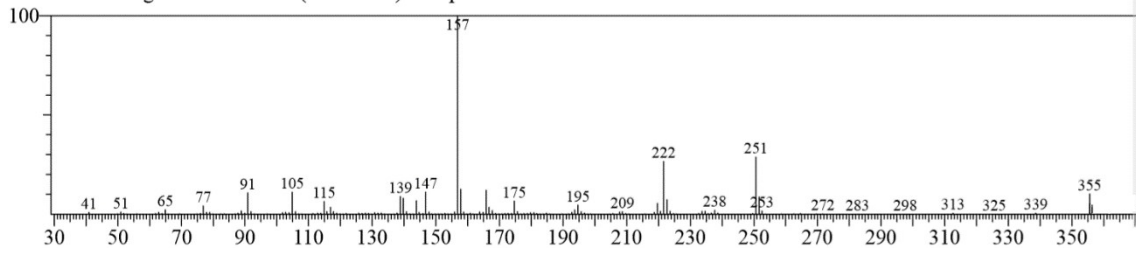

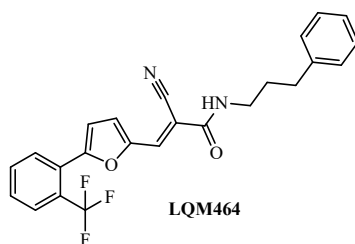

(E)-2-Cyano-N-(3-phenylpropyl)-3-(5-(2-(trifluoromethyl)phenyl)furan-2-yl)acrylamide  
 Chemical Formula: C<sub>24</sub>H<sub>19</sub>F<sub>3</sub>N<sub>2</sub>O<sub>2</sub>  
 Exact Mass: 424.42 g/mol

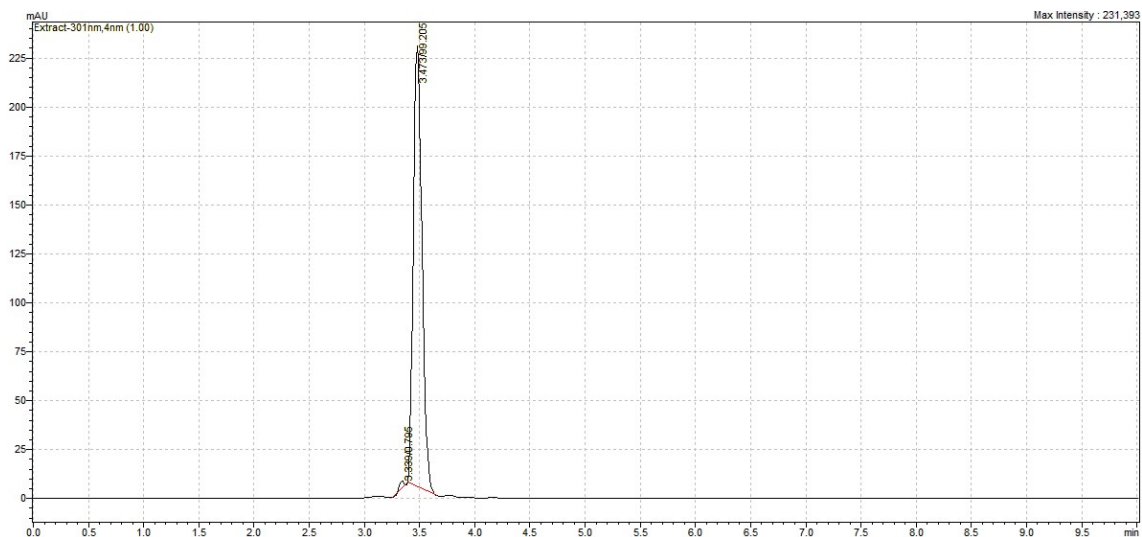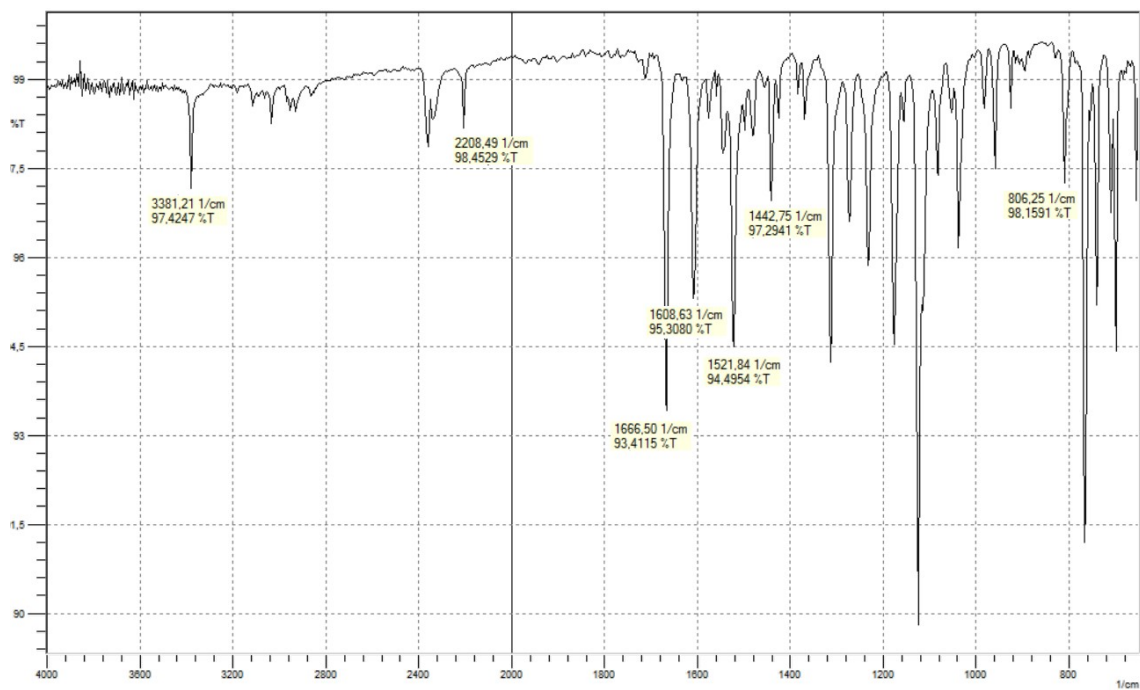



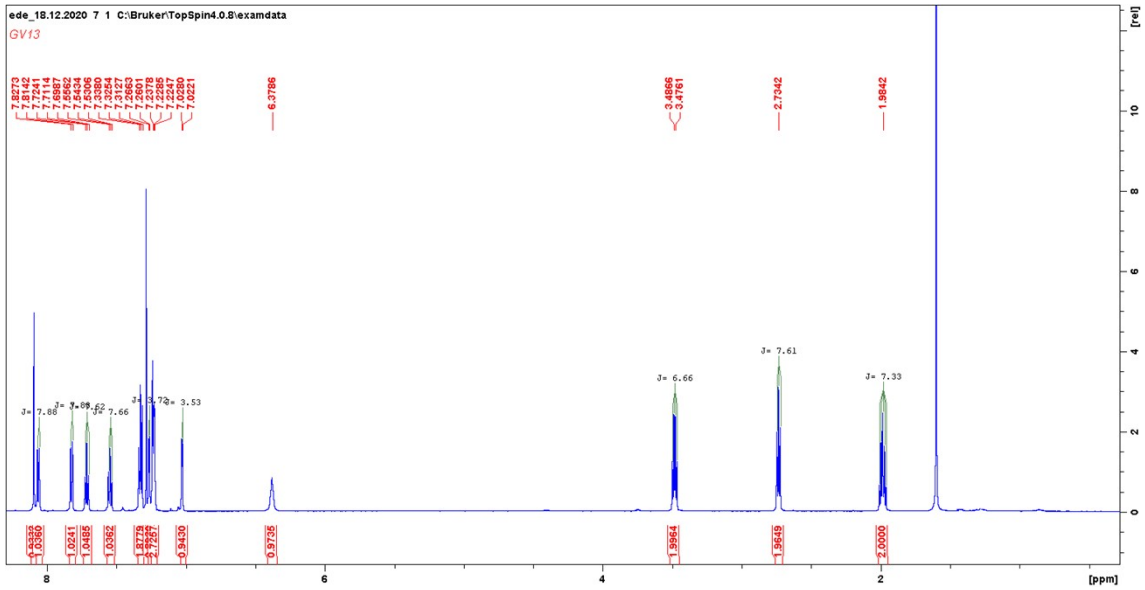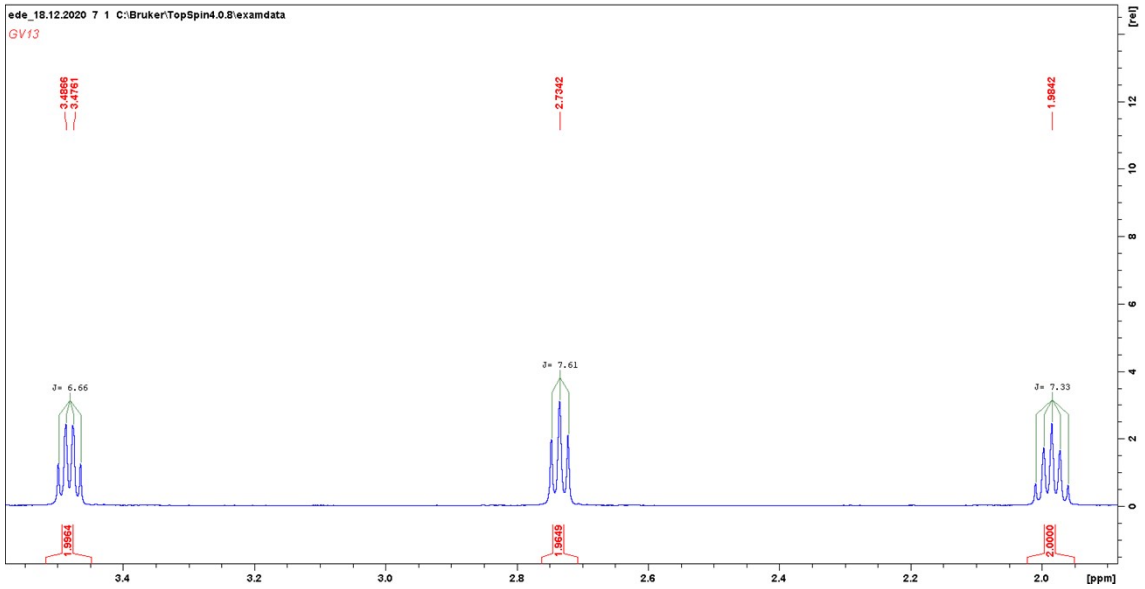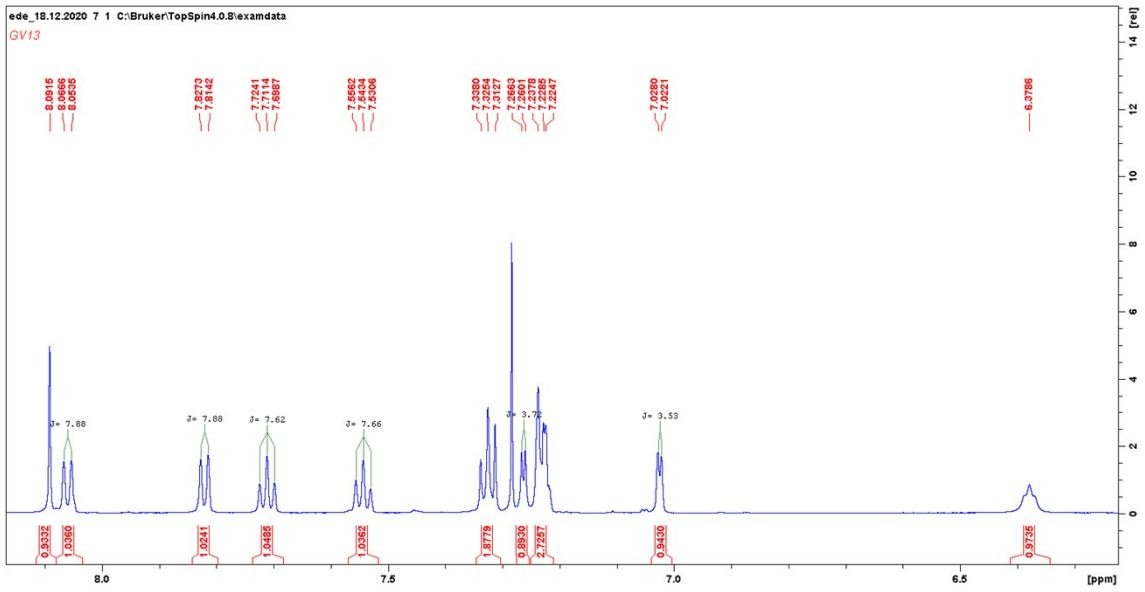

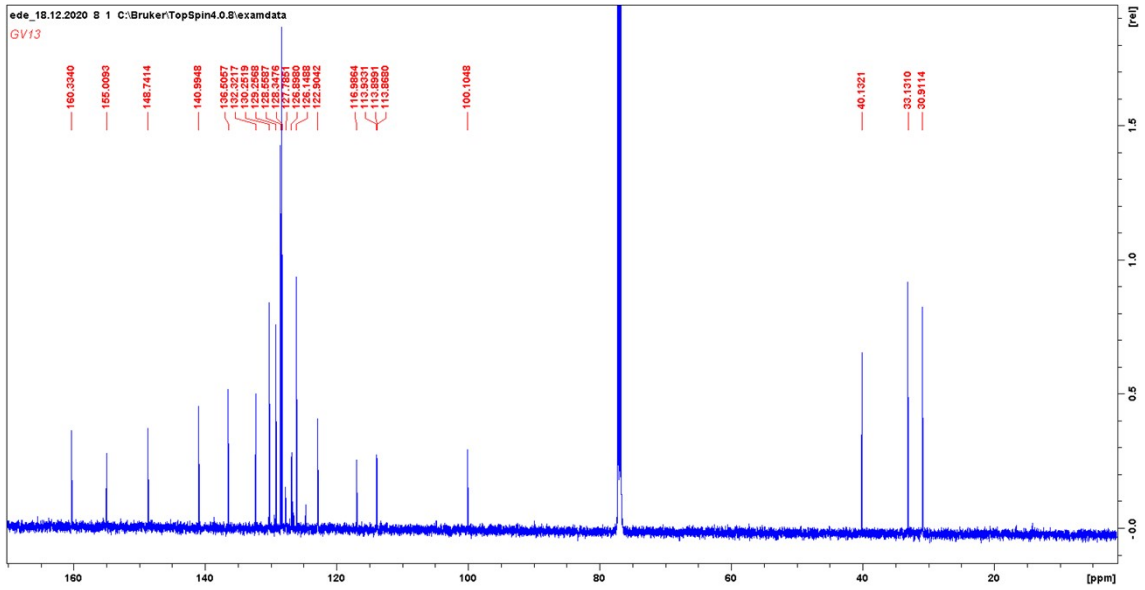

Spectrum1 #Data# GV13.qgd R.Time:26.317(Scan#:2559)  
MassPeaks:348  
RawMode:Averaged 25.725-26.967(2488-2637) BasePeak:224.60(10000)  
BG Mode:Averaged 28.617-28.617(2835-2835) Group 1 - Event 1

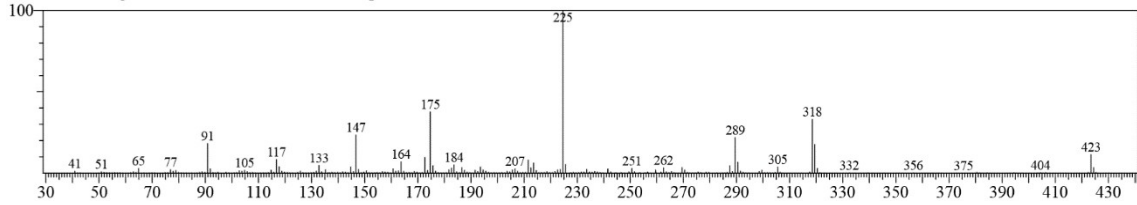

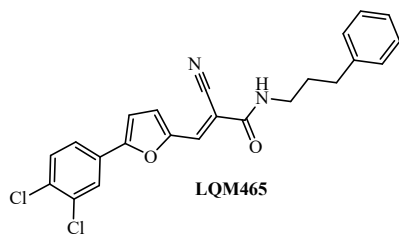

(E)-2-Cyano-3-(5-(3,4-dichlorophenyl)furan-2-yl)-N-(3-phenylpropyl)acrylamide  
 Chemical Formula:  $C_{23}H_{18}Cl_2N_2O_2$   
 Exact Mass: 425.31 g/mol

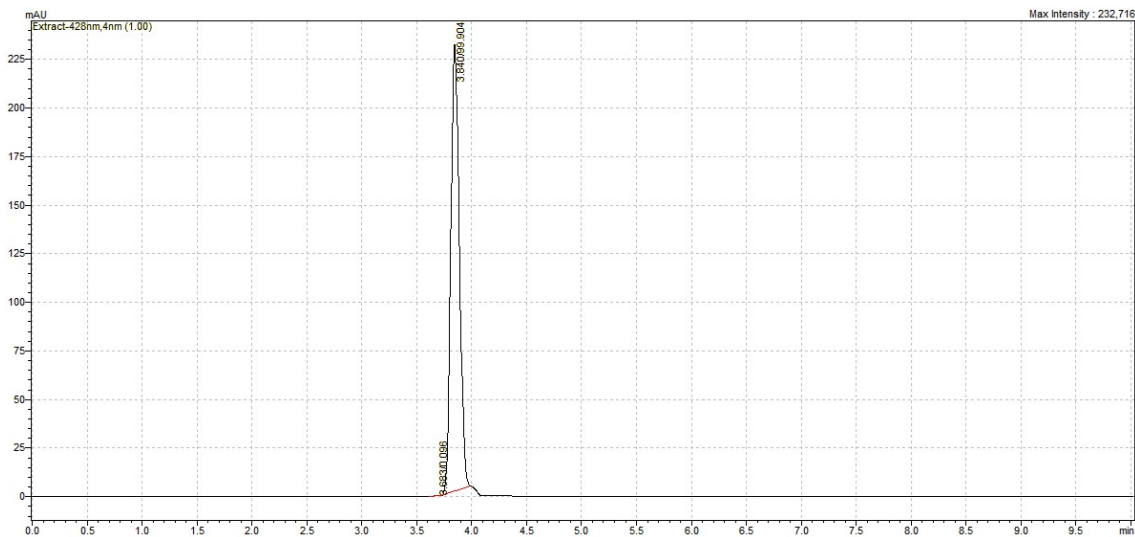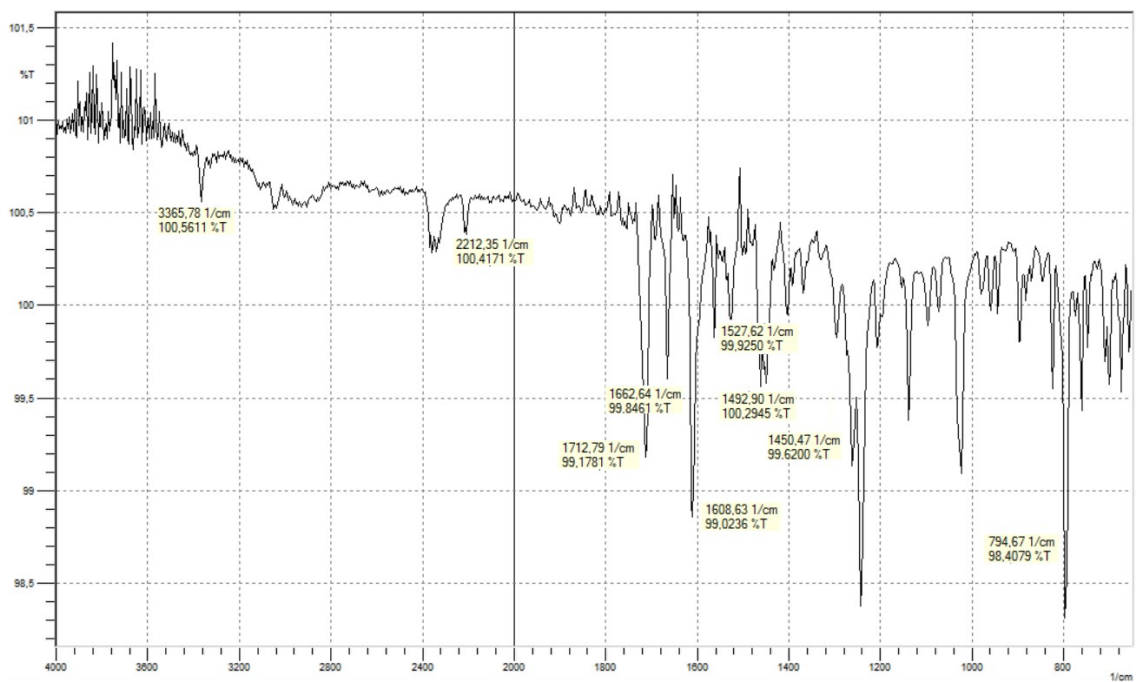

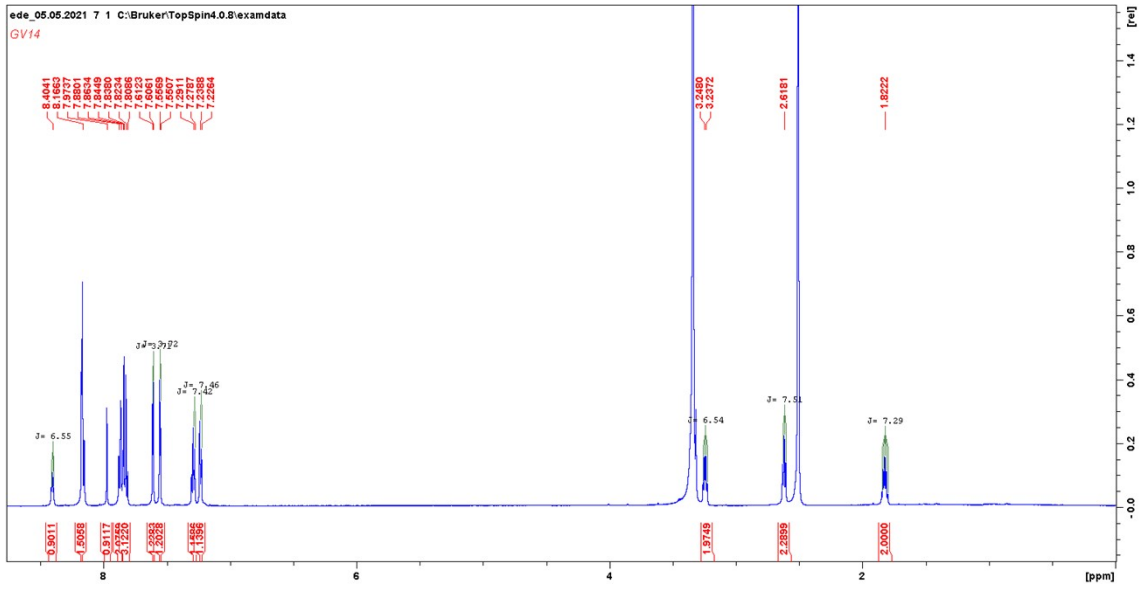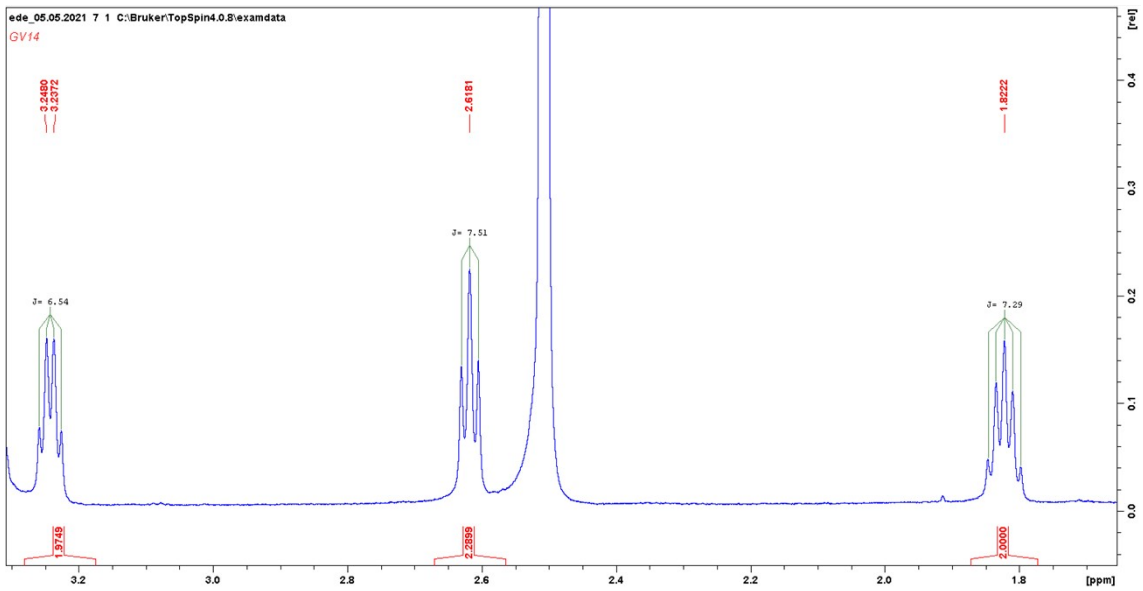

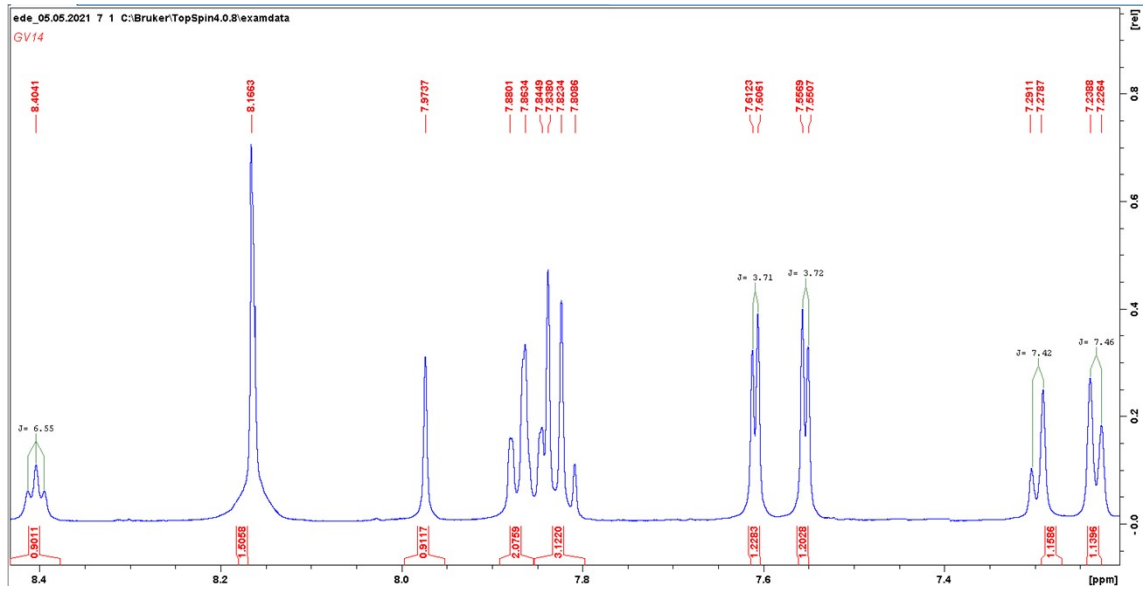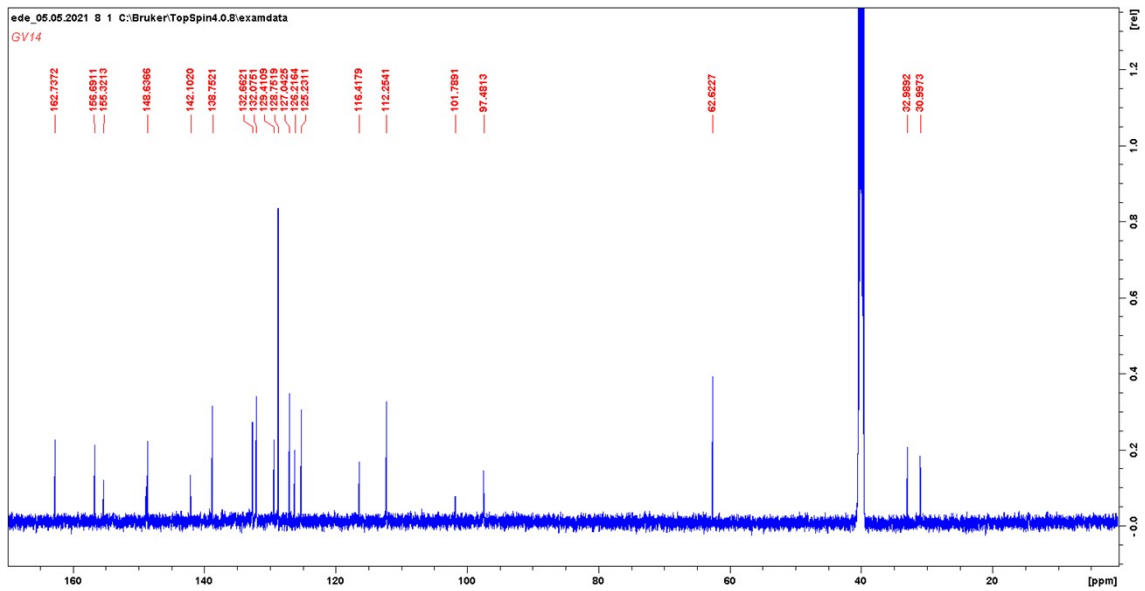

Spectrum1 #Data# GV 14.qgd R.Time:39.750(Scan#:4171)  
MassPeaks:316  
RawMode:Averaged 38.667-40.317(4041-4239) BasePeak:224.60(10000)  
BG Mode:Averaged 36.875-37.183(3826-3863) Group 1 - Event 1

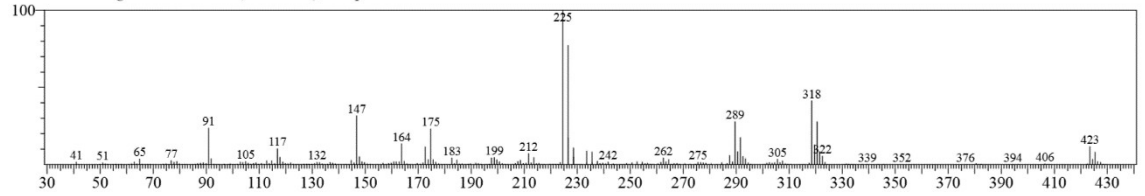

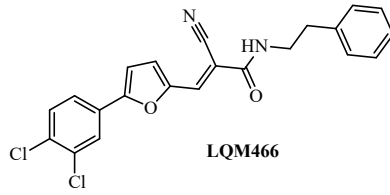

**LQM466**

(*E*)-2-Cyano-3-(5-(3,4-dichlorophenyl)furan-2-yl)-*N*-phenethylacrylamide  
 Chemical Formula: C<sub>22</sub>H<sub>16</sub>Cl<sub>2</sub>N<sub>2</sub>O<sub>2</sub>  
 Exact Mass: 411.28 g/mol

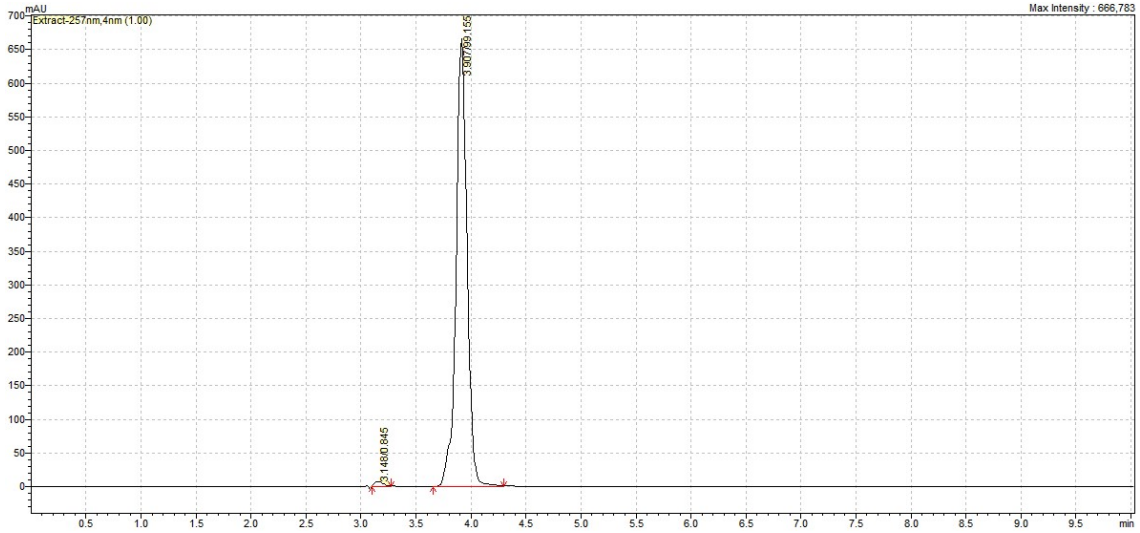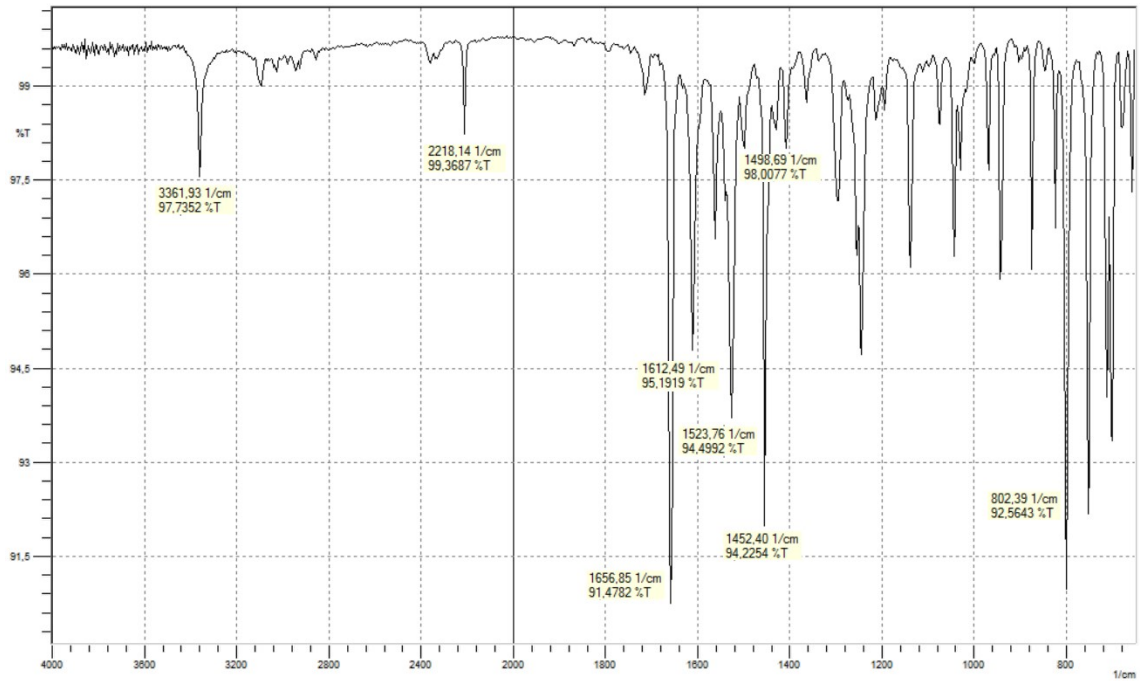

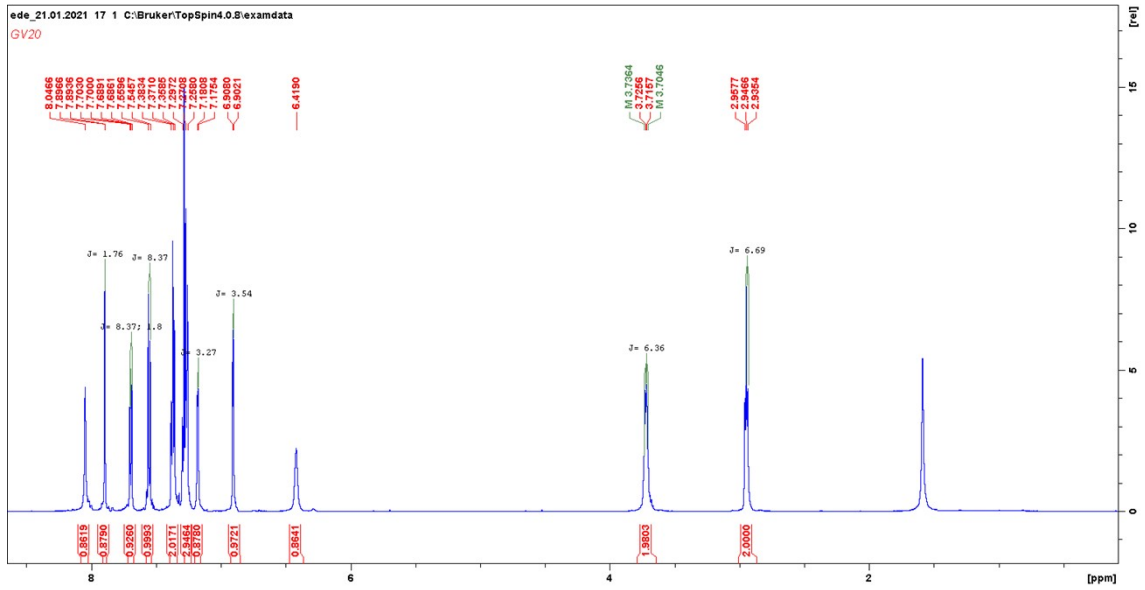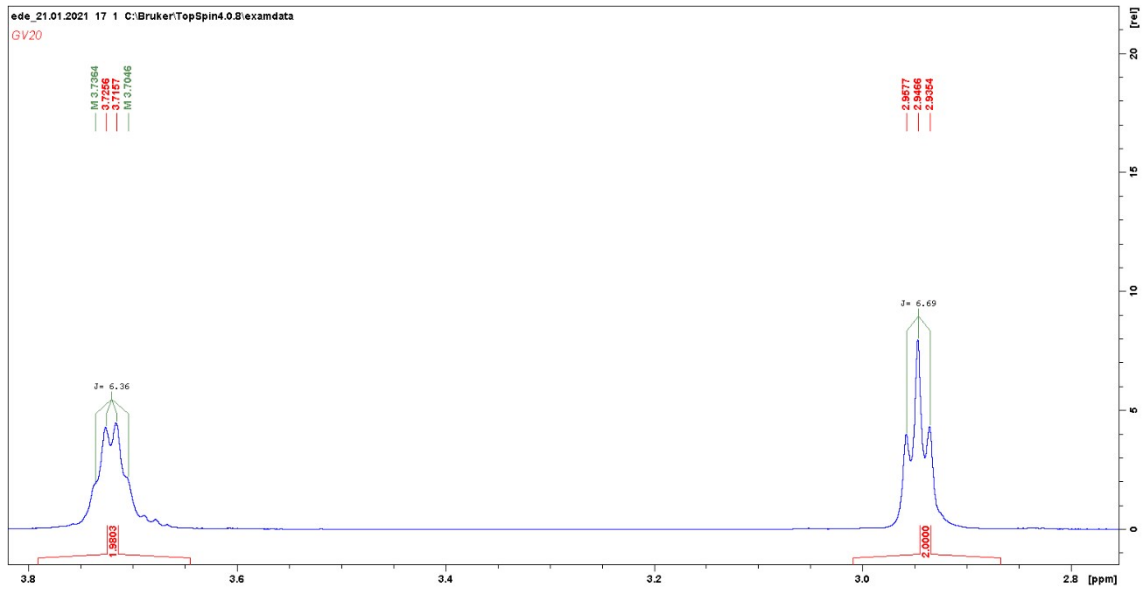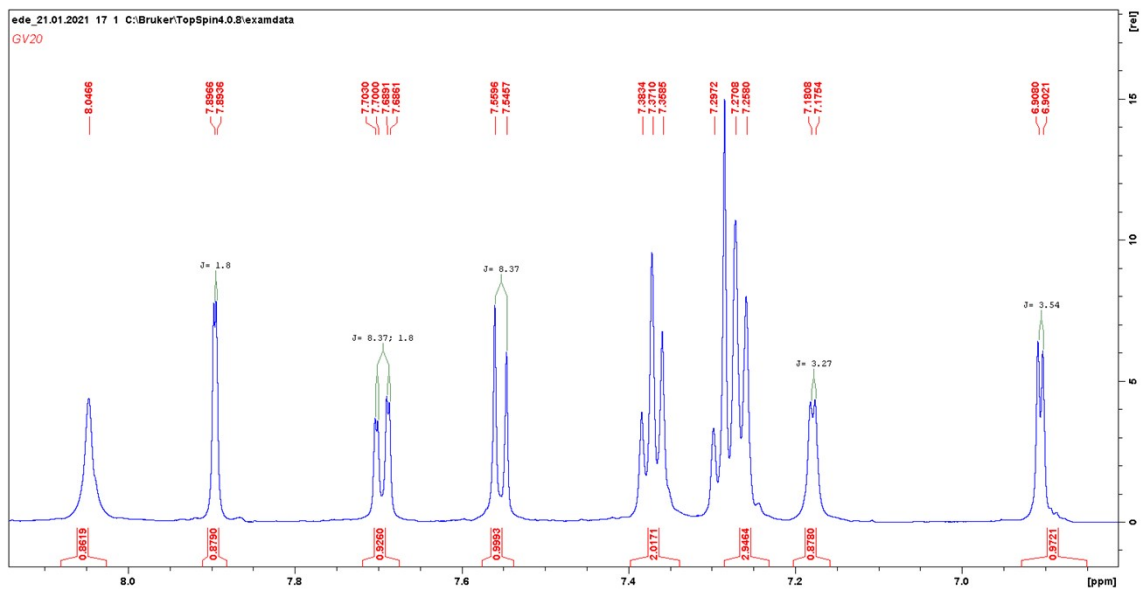

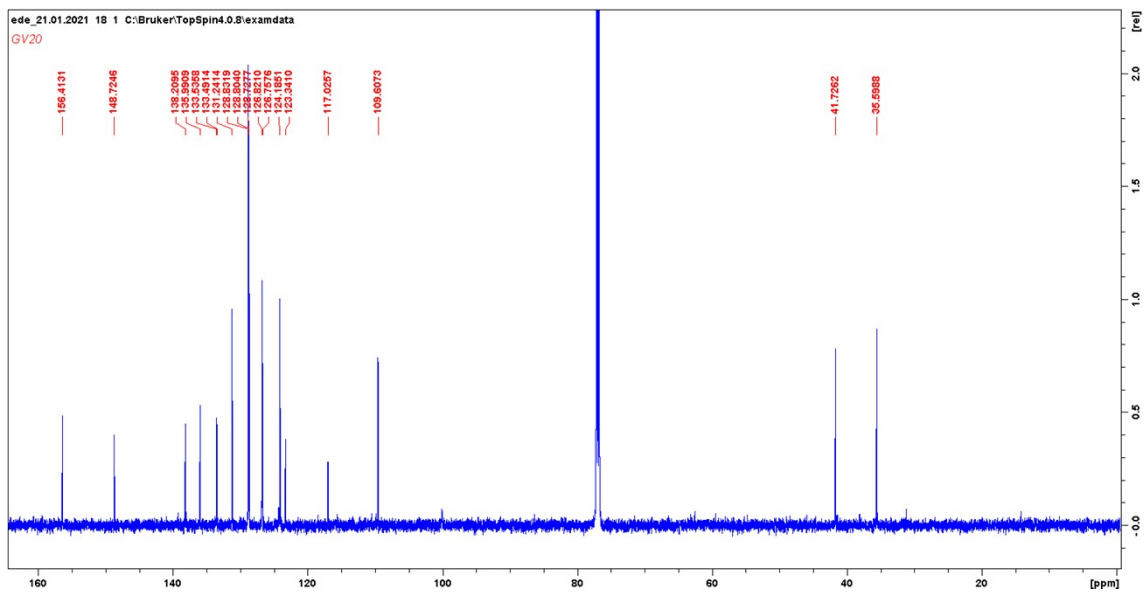

Spectrum1 #Data# GV 20 2.qgd R.Time:35.850(Scan#:3703)  
MassPeaks:300  
RawMode:Averaged 34.467-36.467(3537-3777) BasePeak:289.50(10000)  
BG Mode:Averaged 18.117-18.567(1575-1629) Group 1 - Event 1

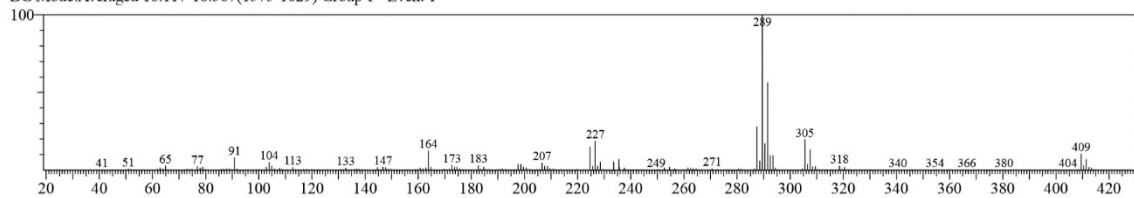



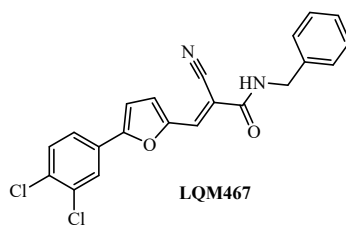

(E)-N-Benzyl-2-cyano-3-(5-(3,4-dichlorophenyl)furan-2-yl)acrylamide  
 Chemical Formula: C<sub>21</sub>H<sub>14</sub>Cl<sub>2</sub>N<sub>2</sub>O<sub>2</sub>  
 Exact Mass: 397.26 g/mol

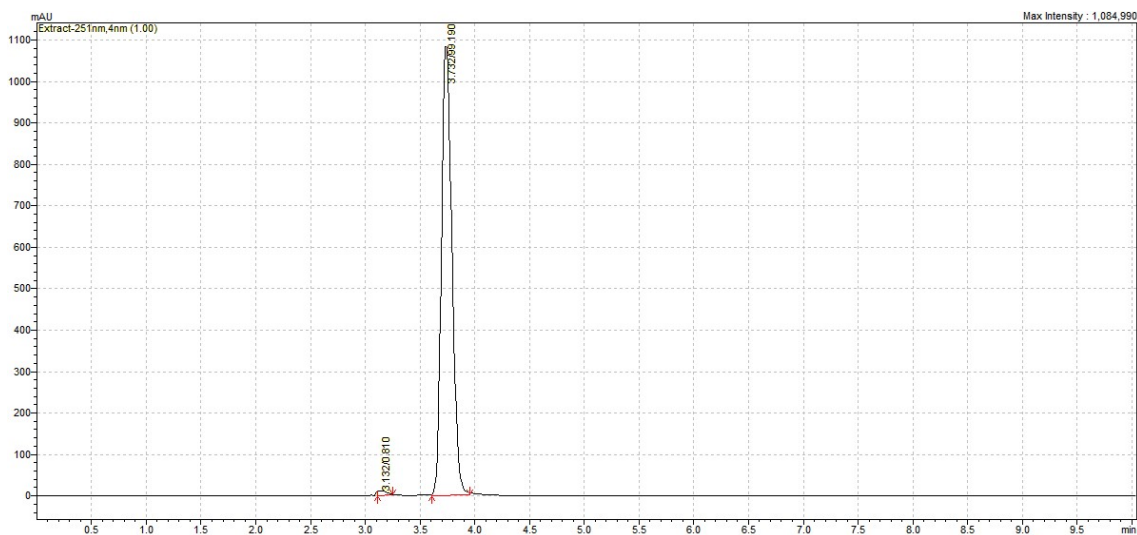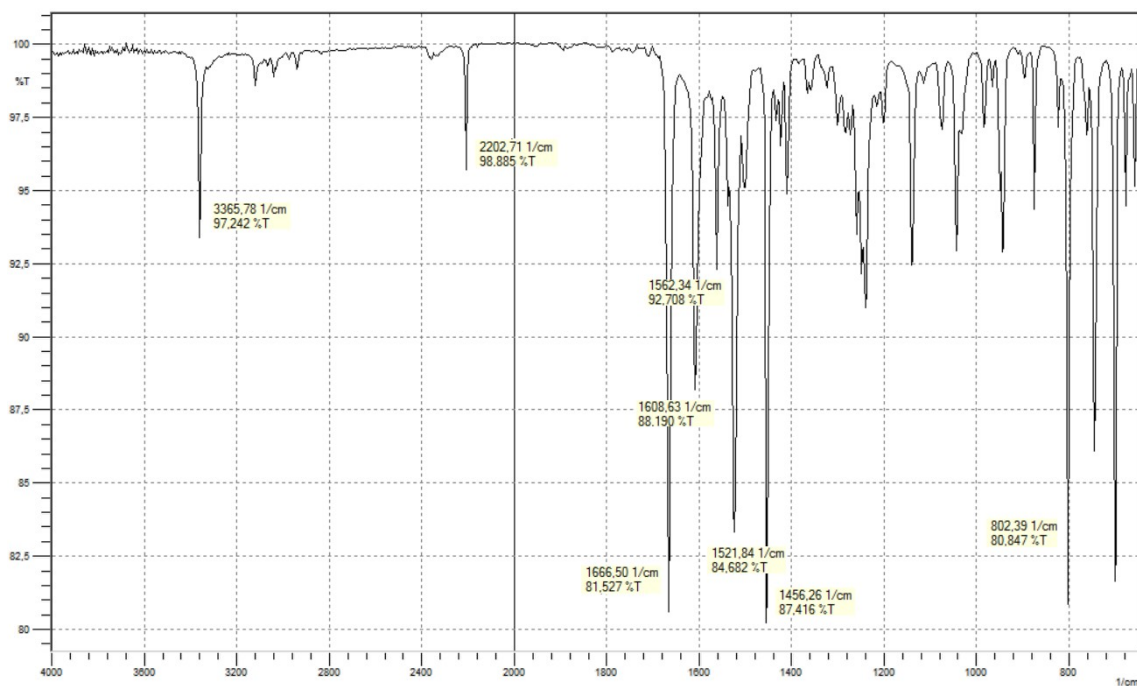

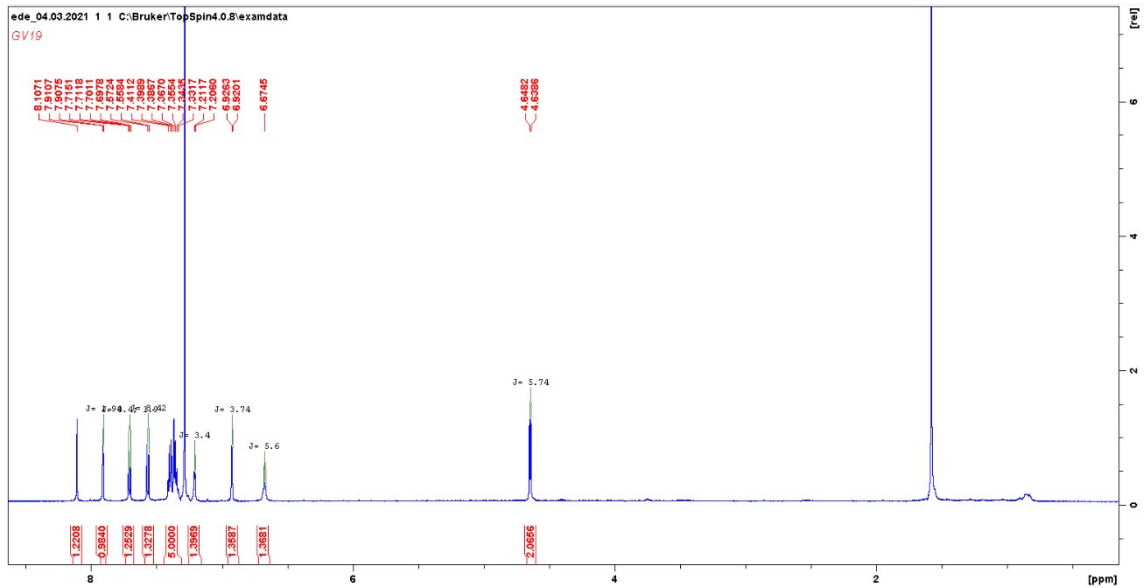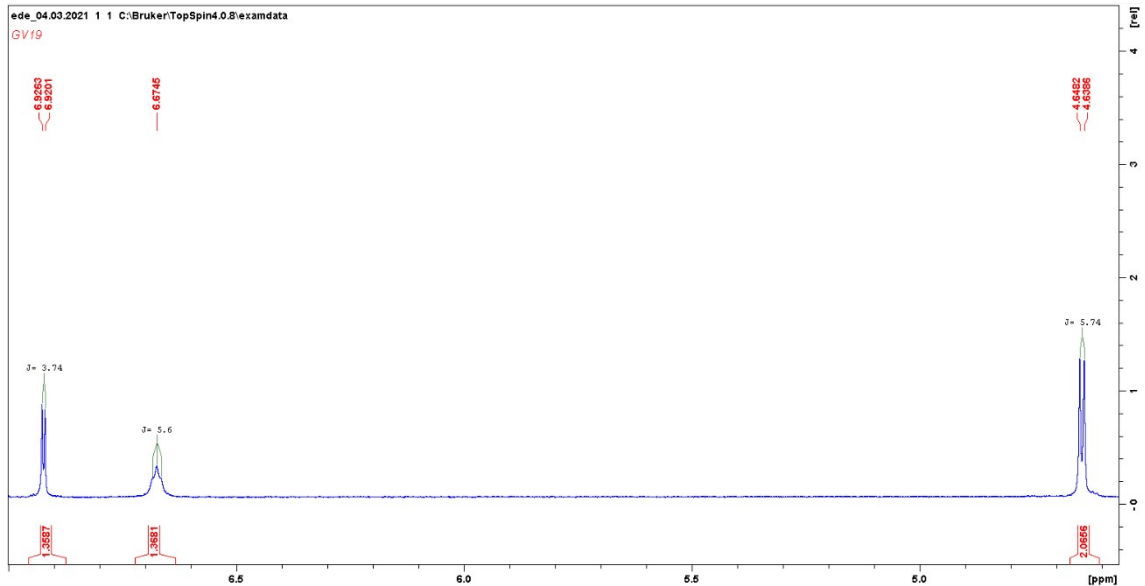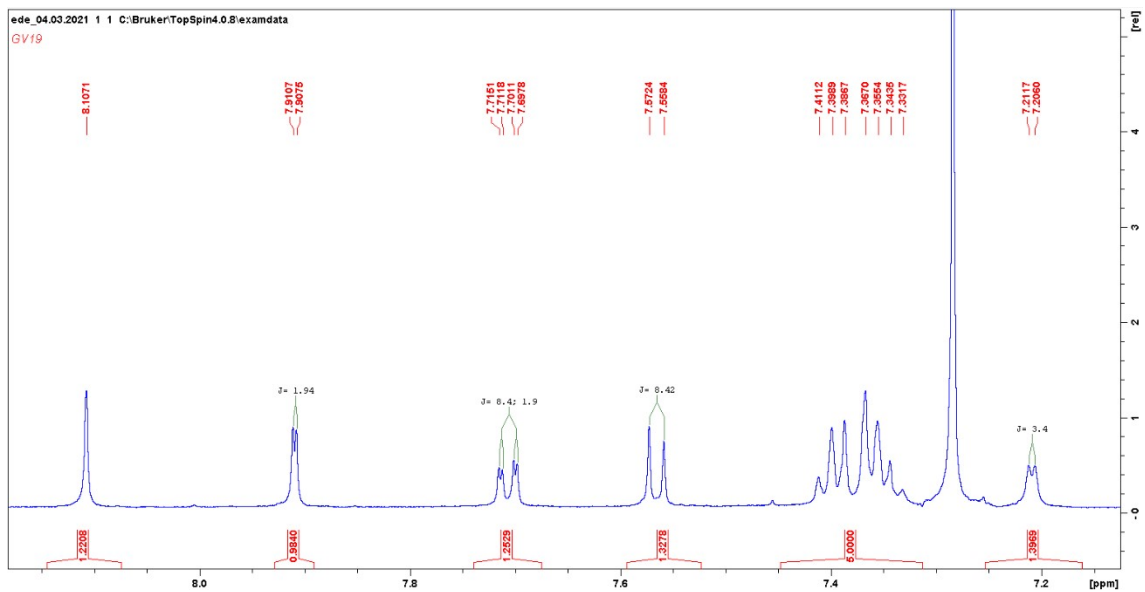

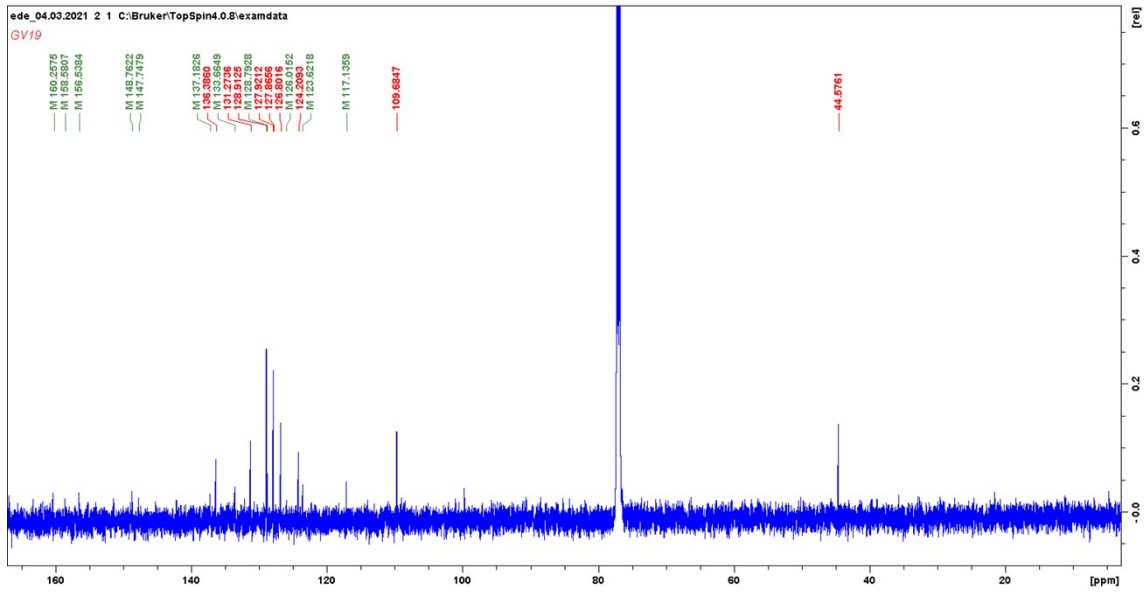

Spectrum1 #Data# GV19.qgd R.Time:33.517(Scan#:3423)  
 MassPeaks:318  
 RawMode:Averaged 32.608-33.867(3314-3465) BasePeak:90.85(10000)  
 BG Mode:Averaged 32.000-32.000(3241-3241) Group 1 - Event 1

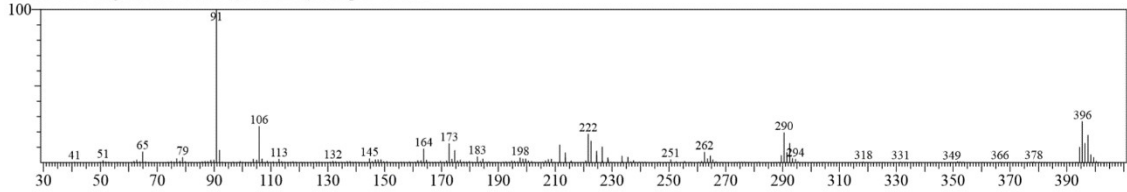

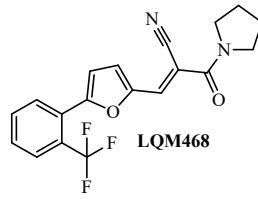

(*E*)-2-(Pyrrolidine-1-carbonyl)-3-(5-(2-(trifluoromethyl)phenyl)furan-2-yl)acrylonitrile  
 Chemical Formula: C<sub>19</sub>H<sub>15</sub>F<sub>3</sub>N<sub>2</sub>O<sub>2</sub>  
 Exact Mass: 360.34 g/mol

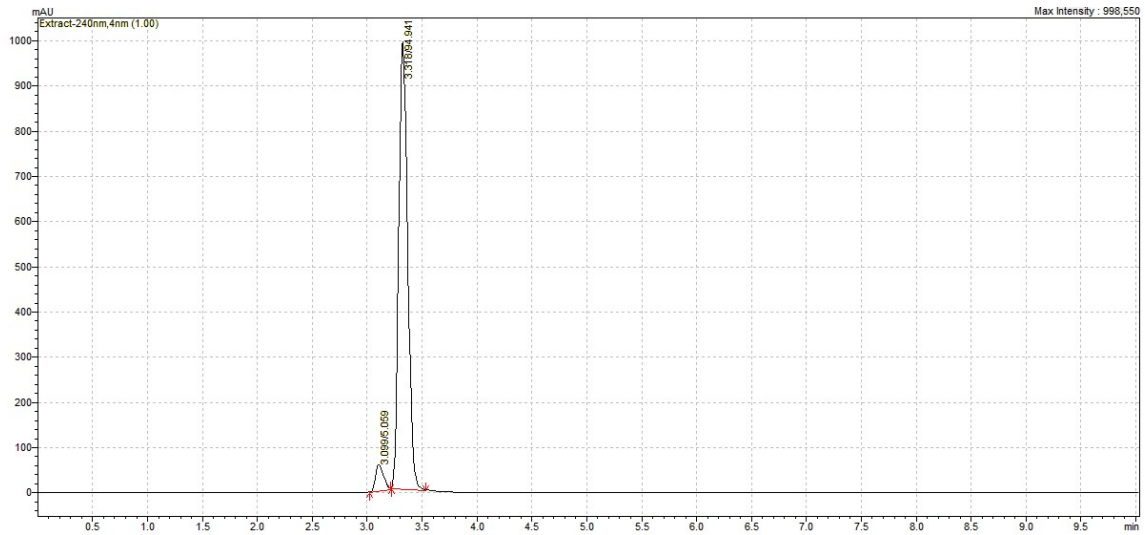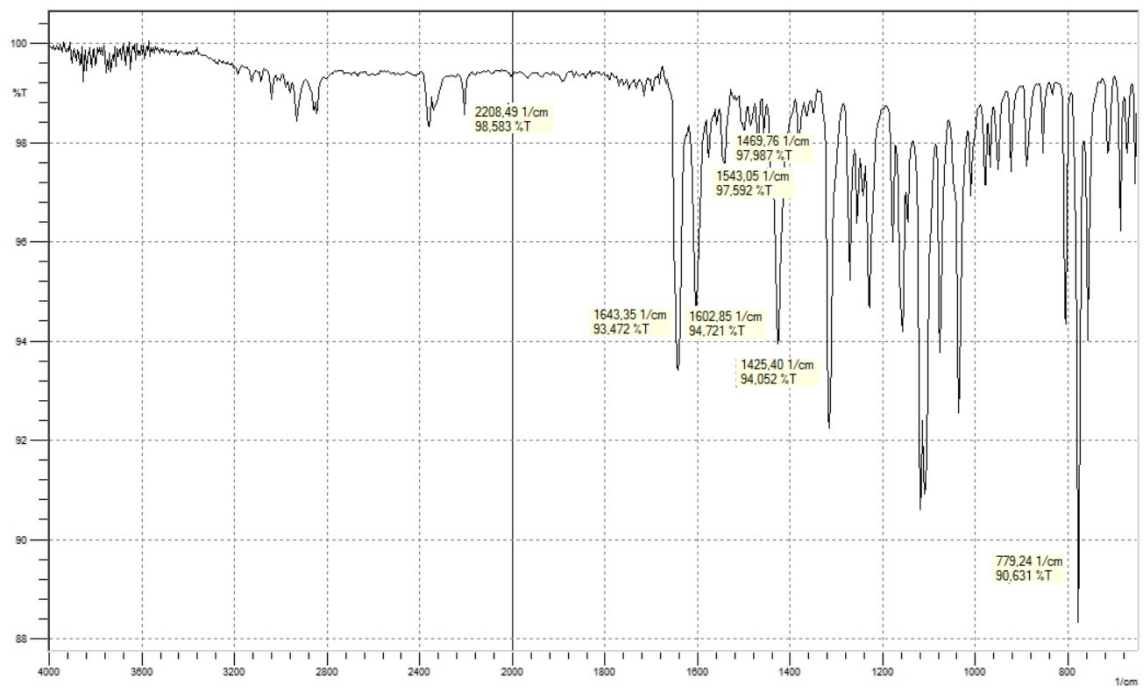

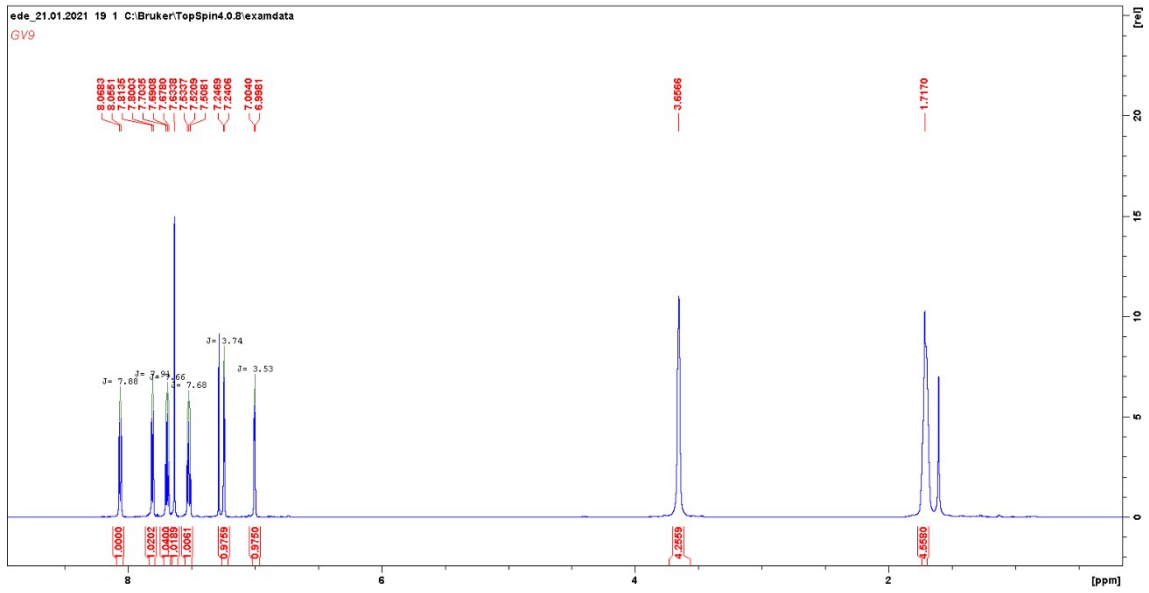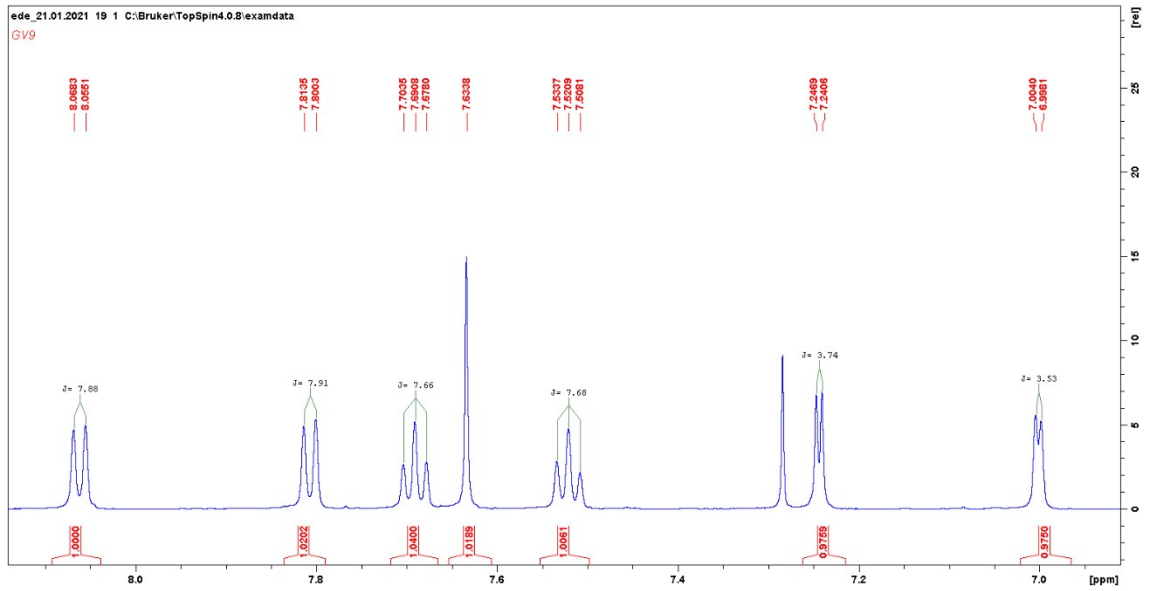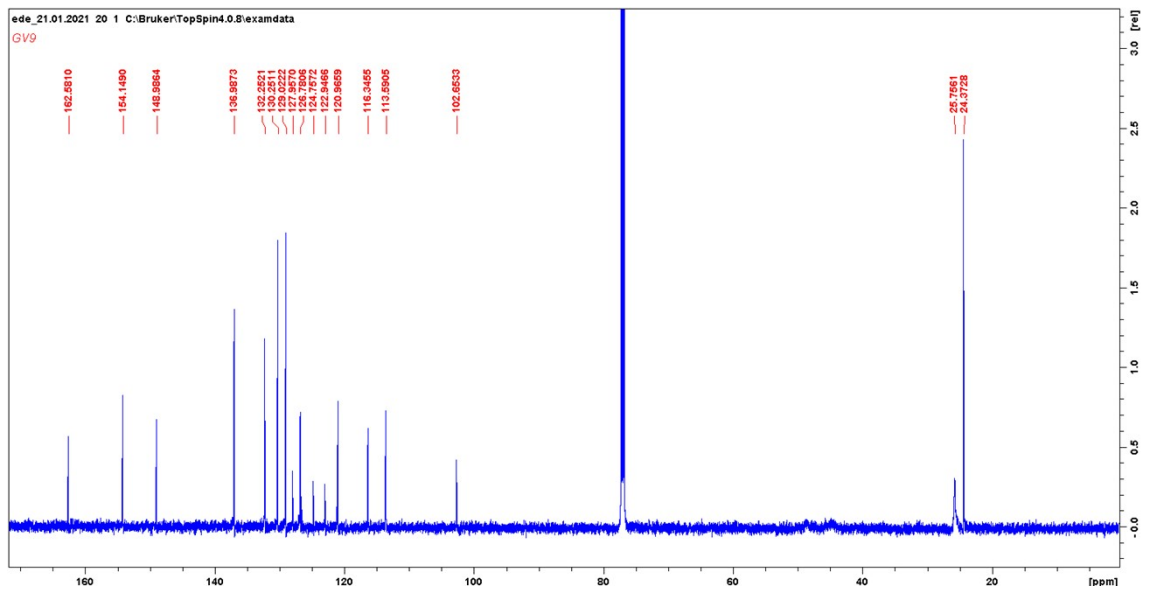

Spectrum1 #Data# GV10.qgd R.Time:27.833(Scan#:2741)  
MassPeaks:295  
RawMode:Averaged 27.308-28.442(2678-2814) BasePeak:186.70(10000)  
BG Mode:Averaged 33.500-33.500(3421-3421) Group 1 - Event 1

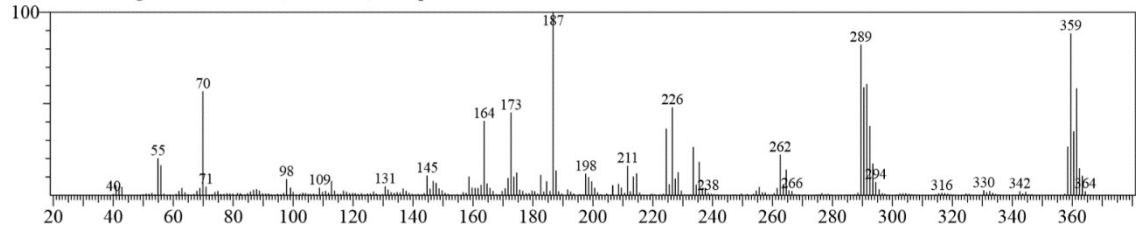

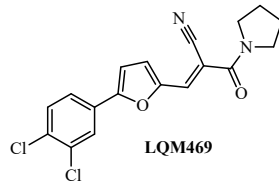

(E)-3-(5-(3,4-Dichlorophenyl)furan-2-yl)-2-(pyrrolidine-1-carbonyl)acrylonitrile  
 Chemical Formula: C<sub>18</sub>H<sub>14</sub>Cl<sub>2</sub>N<sub>2</sub>O<sub>2</sub>  
 Exact Mass: 361.22 g/mol

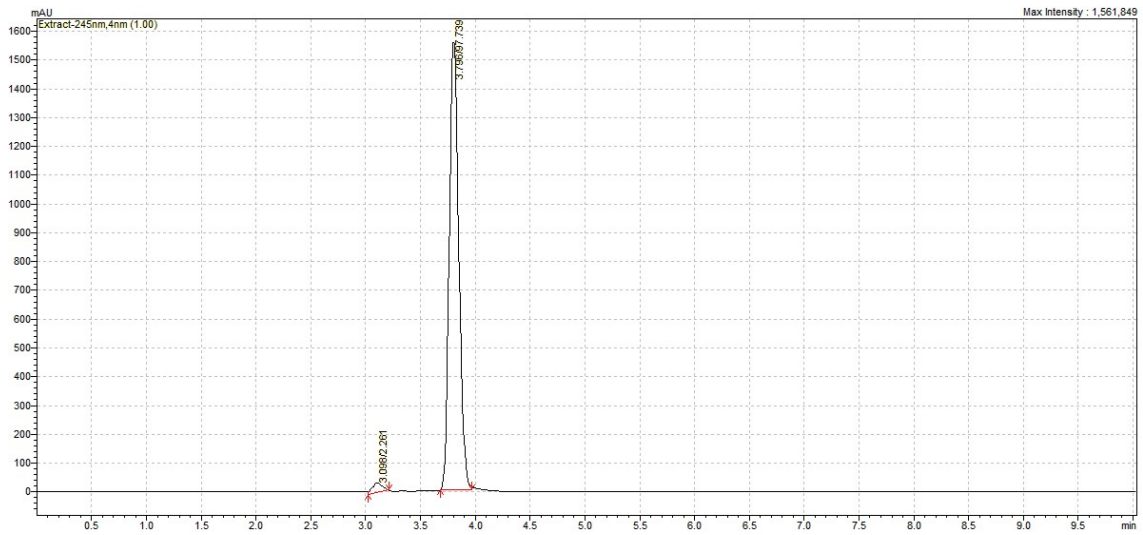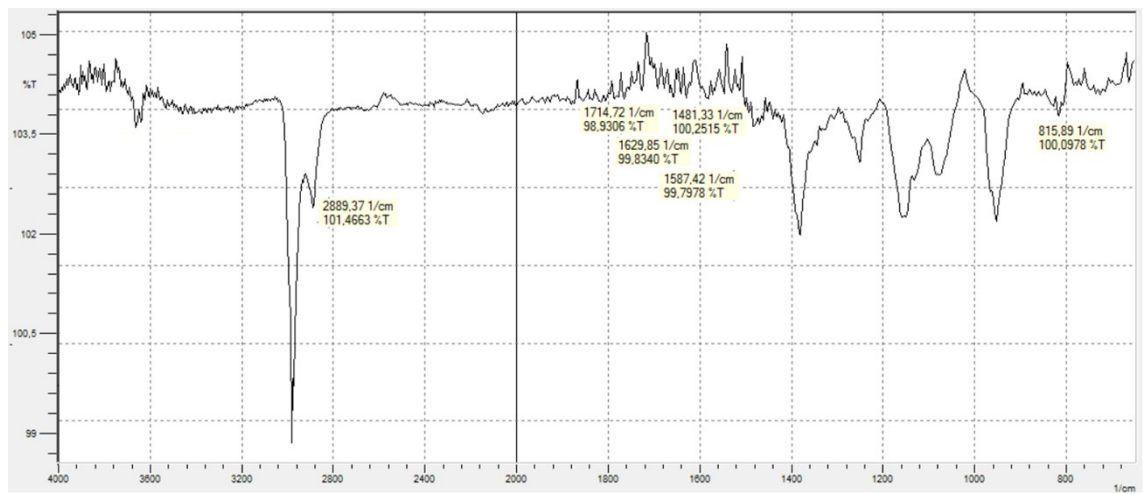

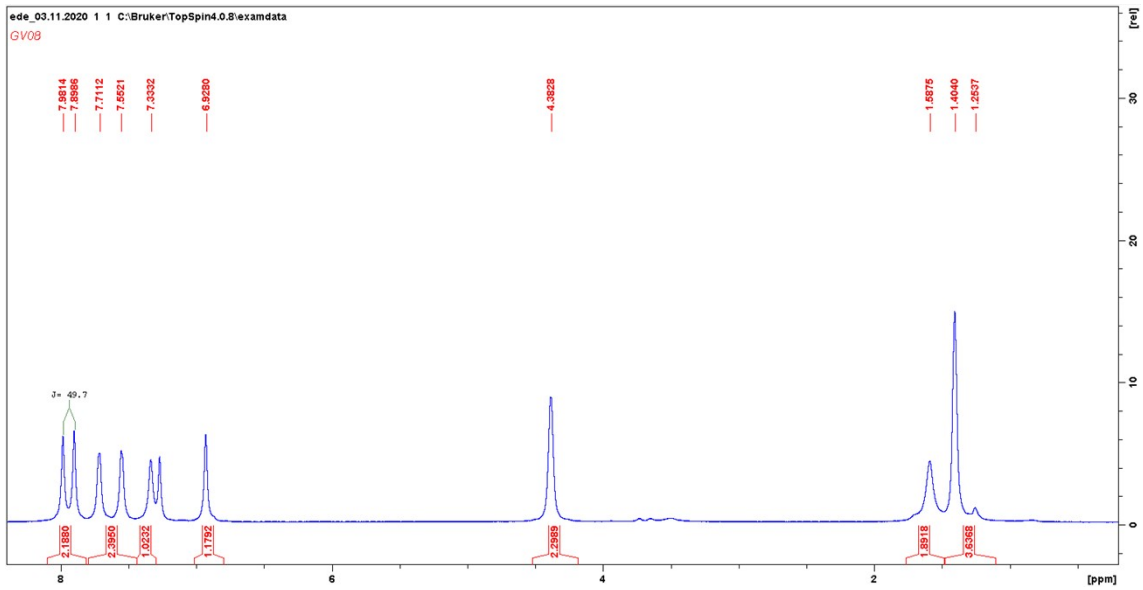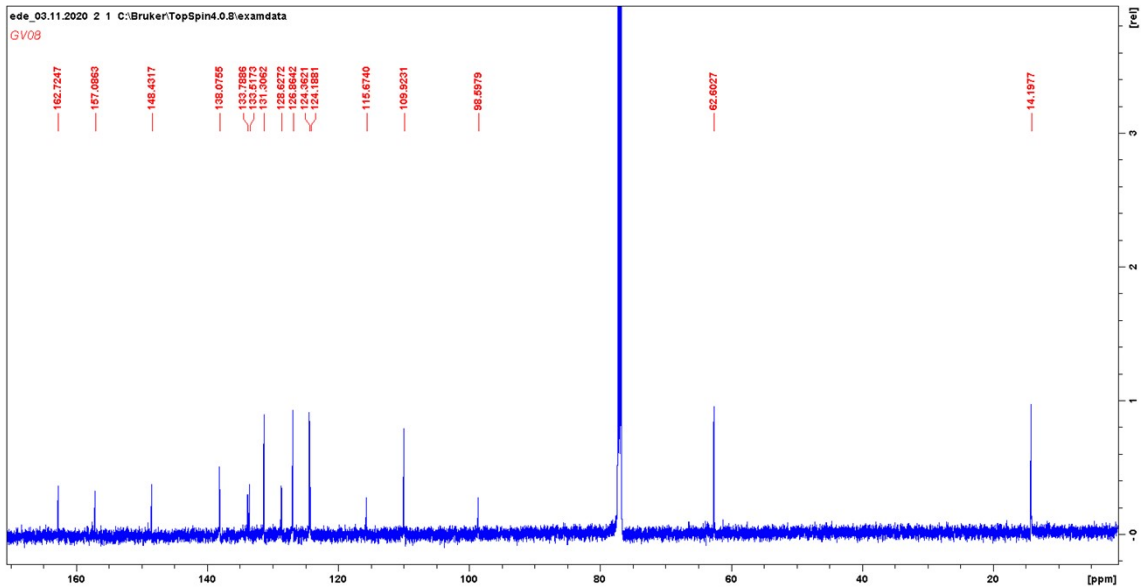

Line#:24 R.Time:37.300(Scan#:3877)  
MassPeaks:144  
RawMode:Averaged 37.292-37.308(3876-3878) BasePeak:261(10196)  
BG Mode:Calc. from Peak Group 1 - Event 1 Scan

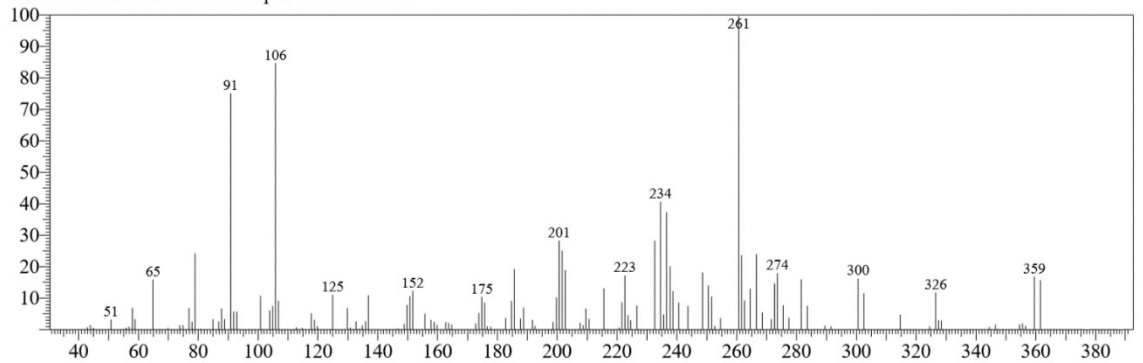



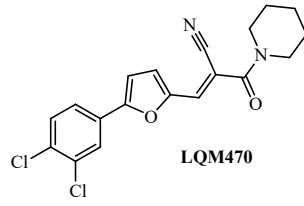

(E)-3-(5-(3,4-Dichlorophenyl)furan-2-yl)-2-(piperidine-1-carbonyl)acrylonitrile  
 Chemical Formula:  $C_{19}H_{16}Cl_2N_2O_2$   
 Exact Mass: 375.25 g/mol

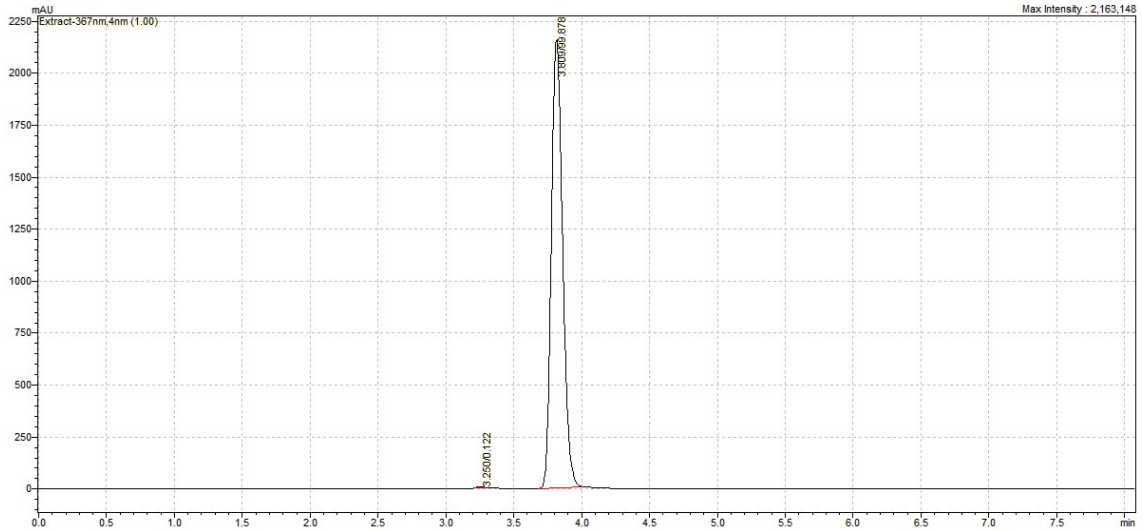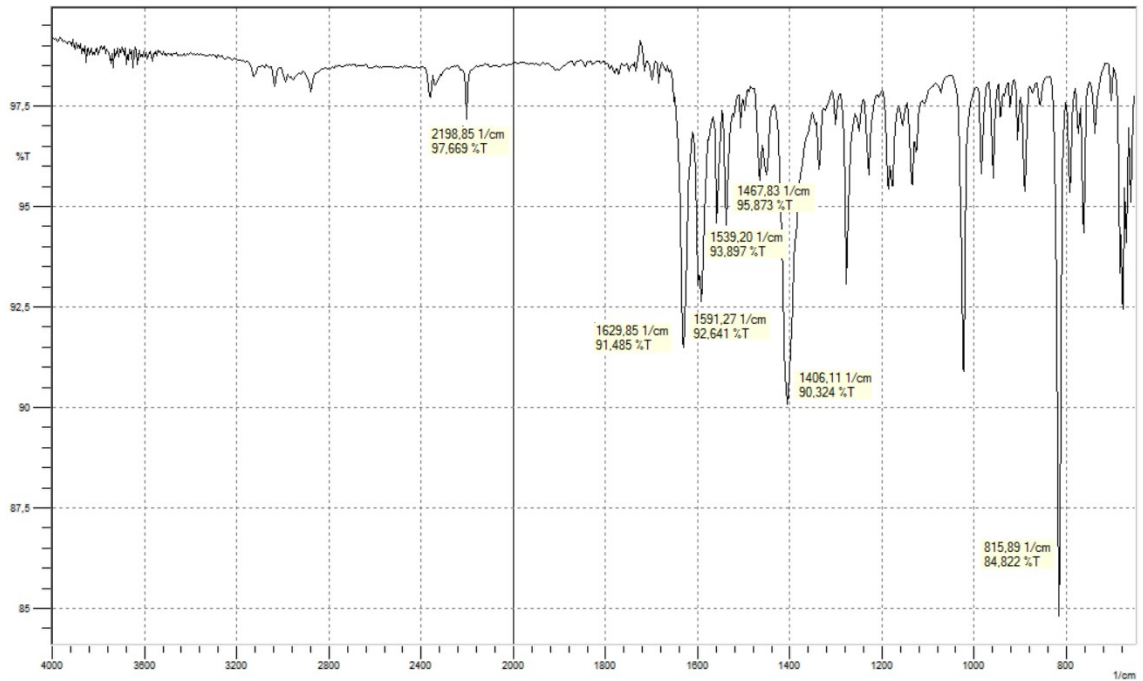

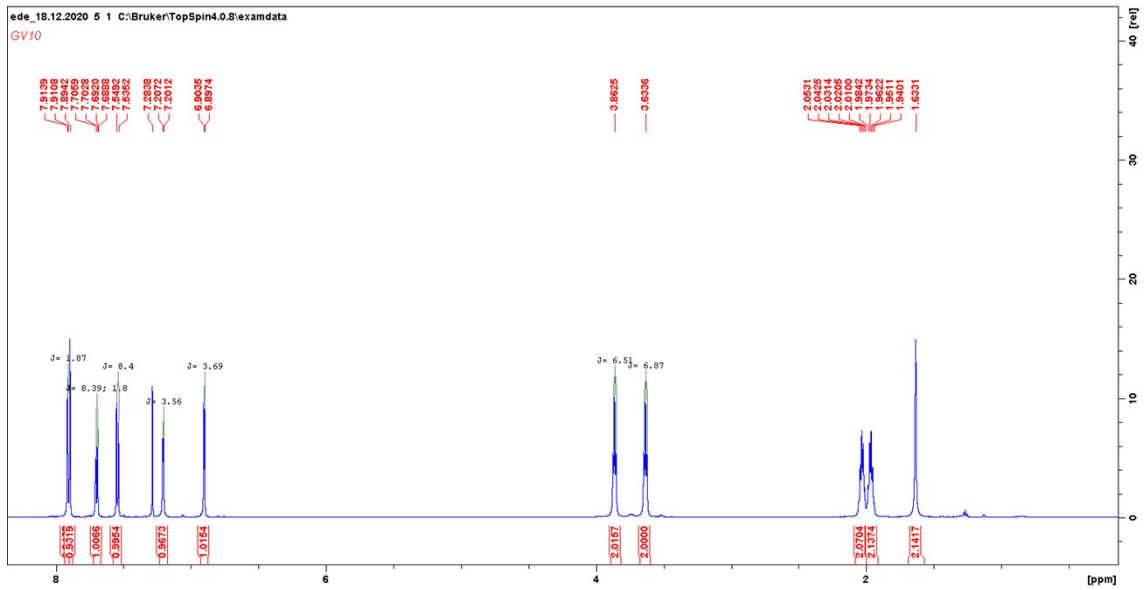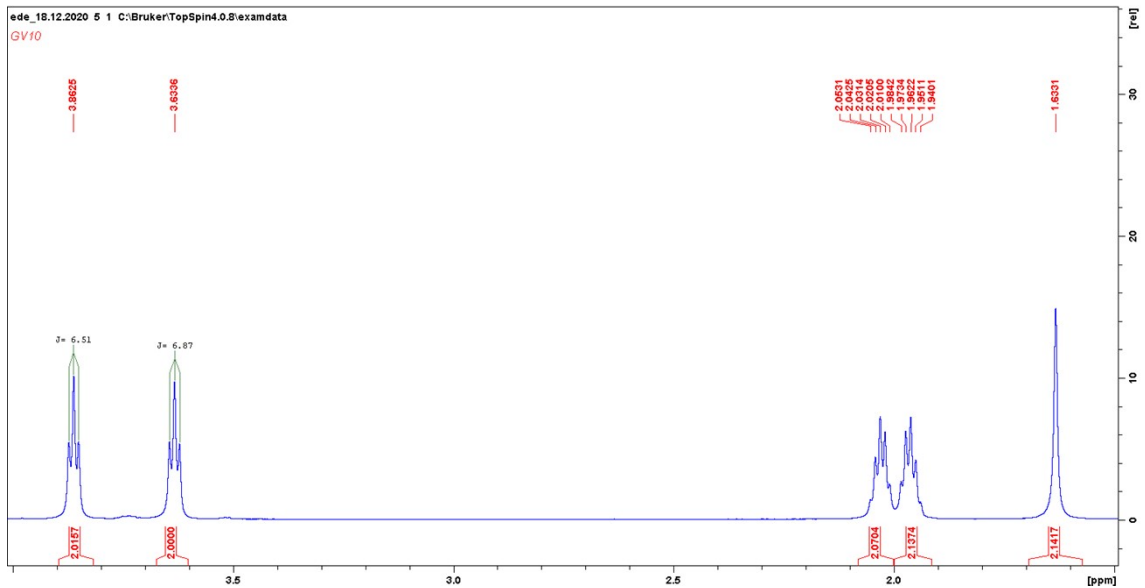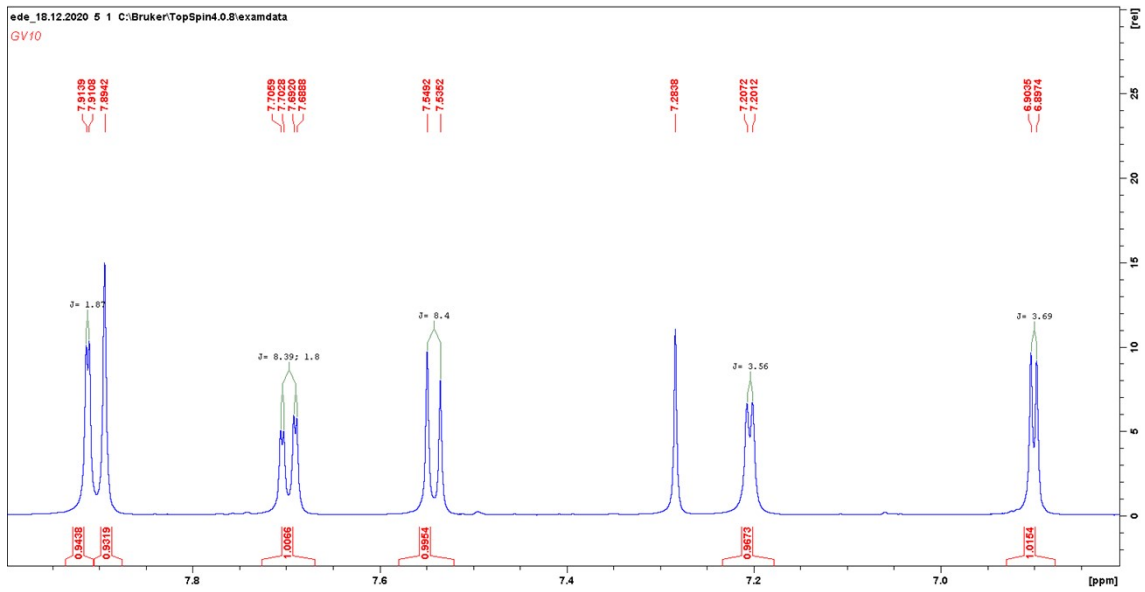

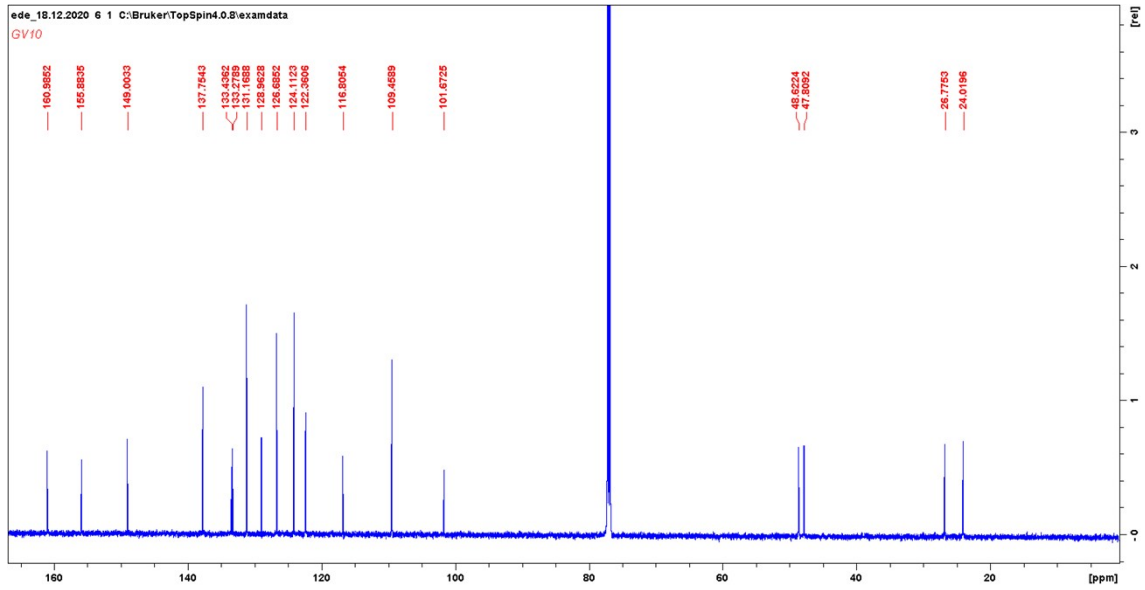

Spectrum1 #Data# GV09.qgd R.Time:22.042(Scan#:2046)  
MassPeaks:297  
RawMode:Averaged 21.883-22.150(2027-2059) BasePeak:372.50(10000)  
BG Mode:Averaged 22.425-22.425(2092-2092) Group 1 - Event 1

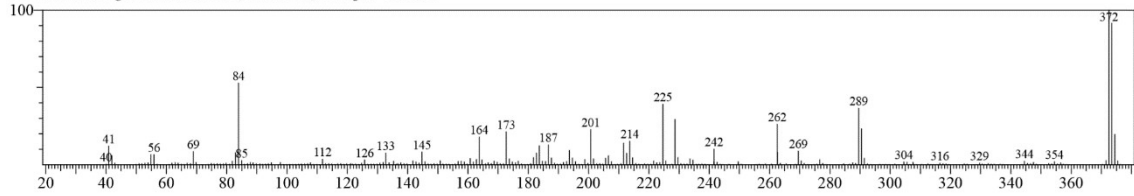

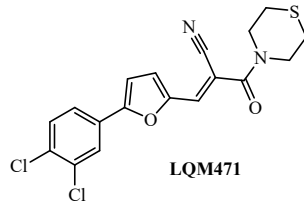

(E)-3-(5-(3,4-Dichlorophenyl)furan-2-yl)-2-(thiomorpholine-4-carbonyl)acrylonitrile  
 Chemical Formula: C<sub>18</sub>H<sub>14</sub>Cl<sub>2</sub>N<sub>2</sub>O<sub>2</sub>S  
 Exact Mass: 393.28 g/mol

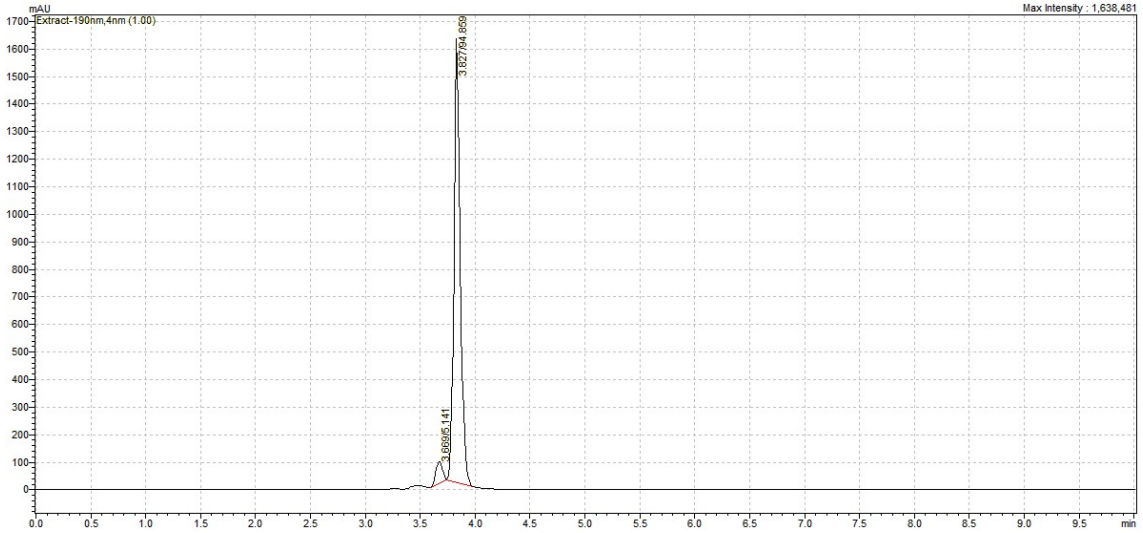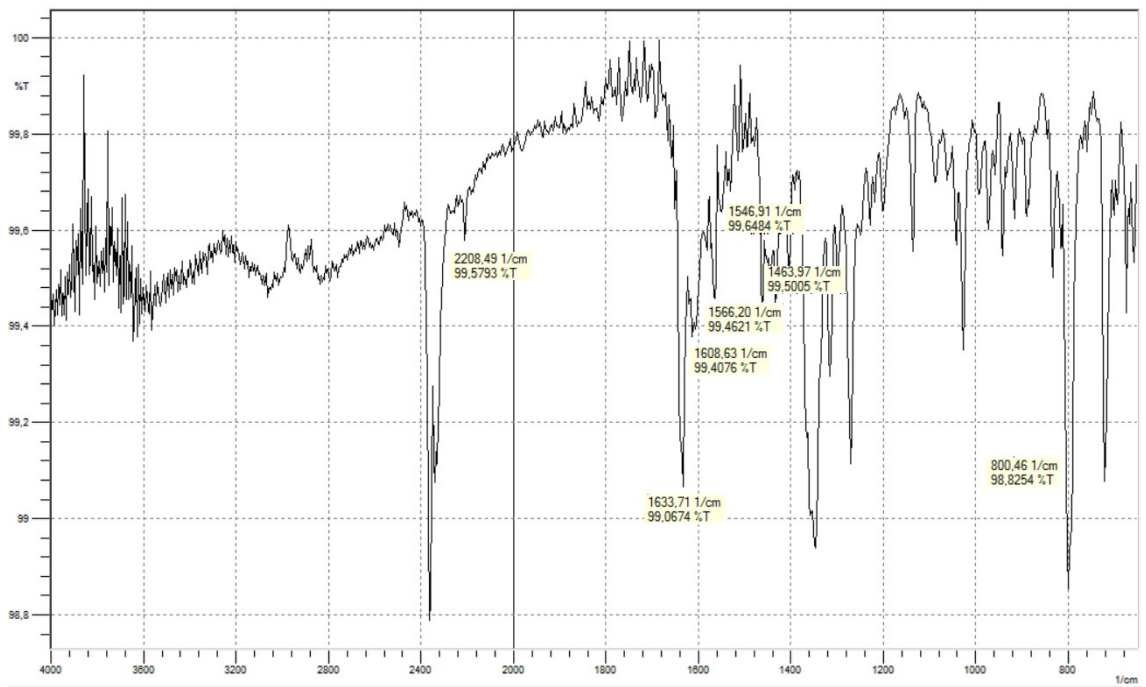

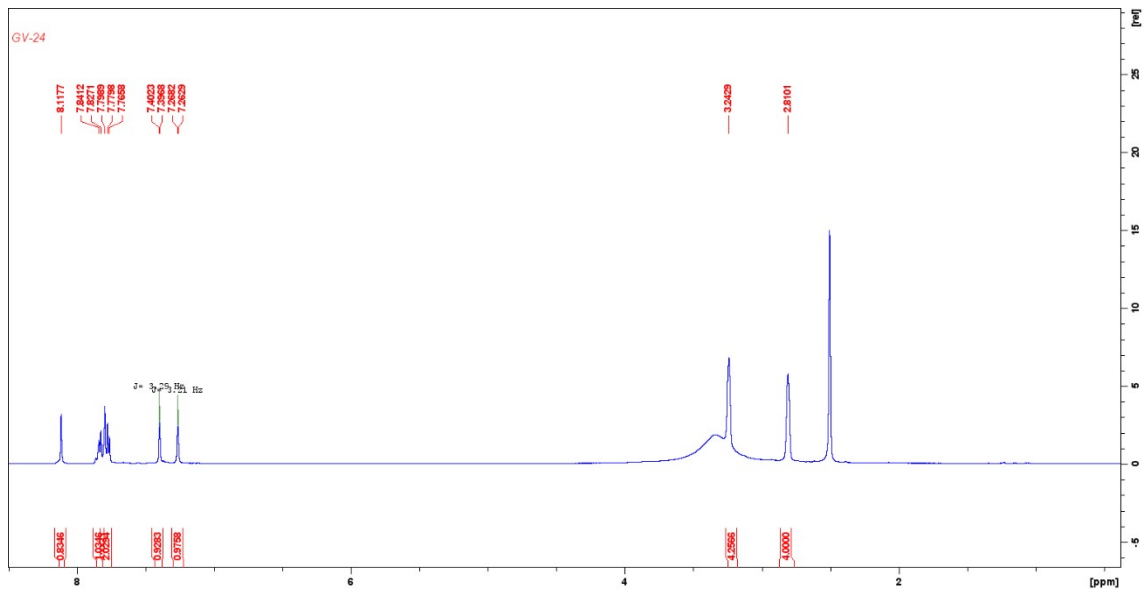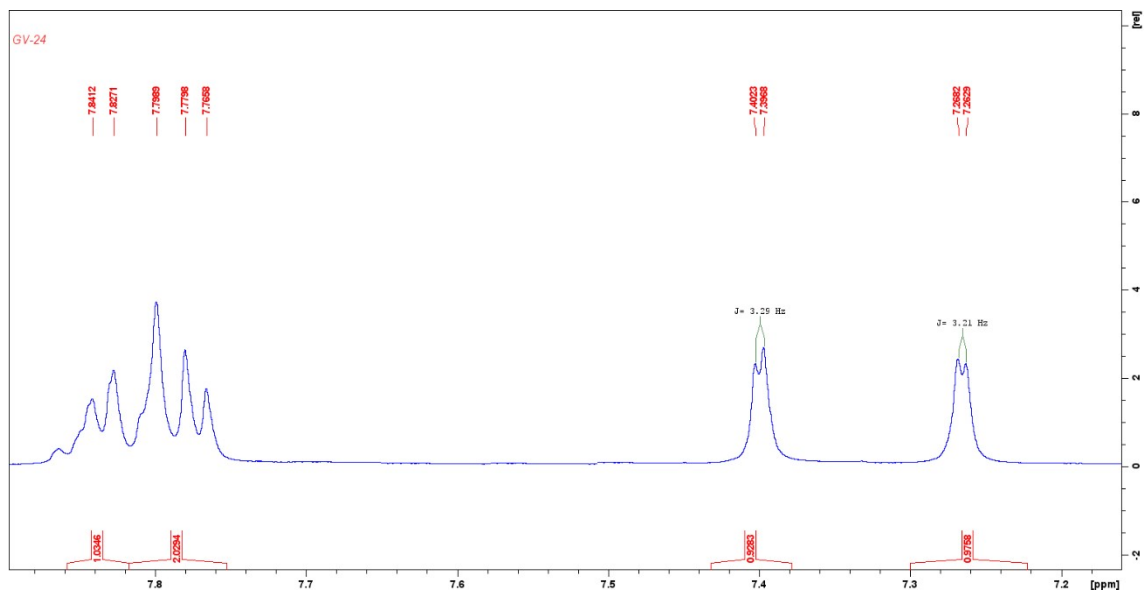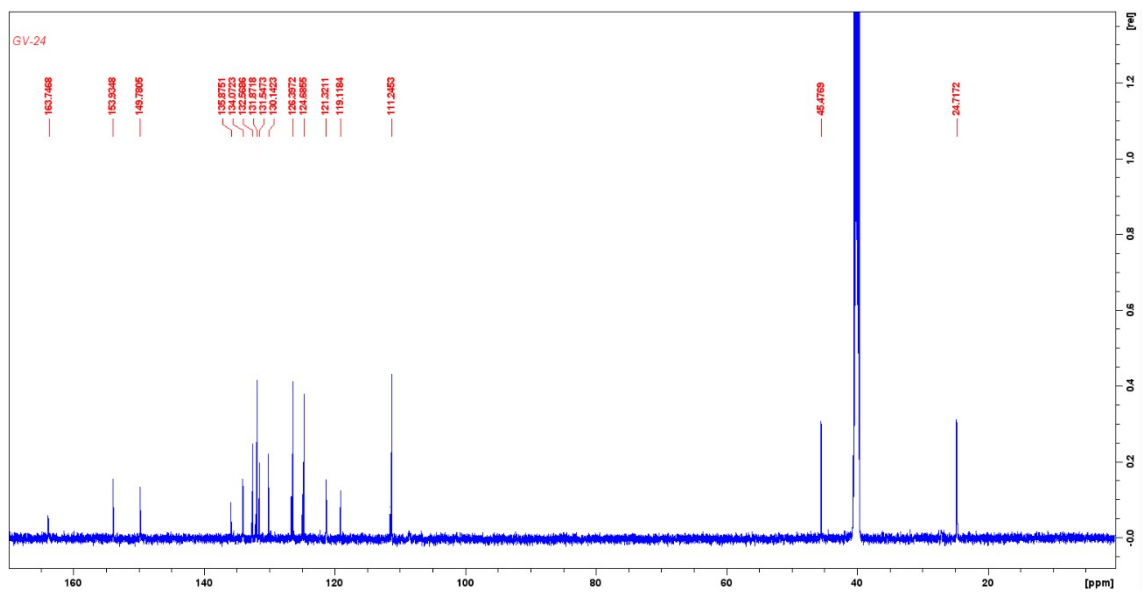

Line#:1 R.Time:32.908(Scan#:3350) MassPeaks:309  
RawMode:Averaged 32.550-33.192(3307-3384) BasePeak:289.95(181529)  
BG Mode:None Group 1 - Event 1 Scan

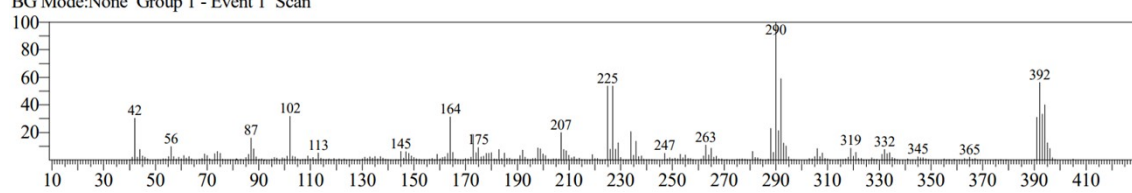

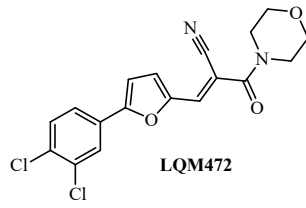

(E)-3-(5-(3,4-Dichlorophenyl)furan-2-yl)-2-(morpholine-4-carbonyl)acrylonitrile  
 Chemical Formula:  $C_{18}H_{14}Cl_2N_2O_3$   
 Exact Mass: 377.22 g/mol

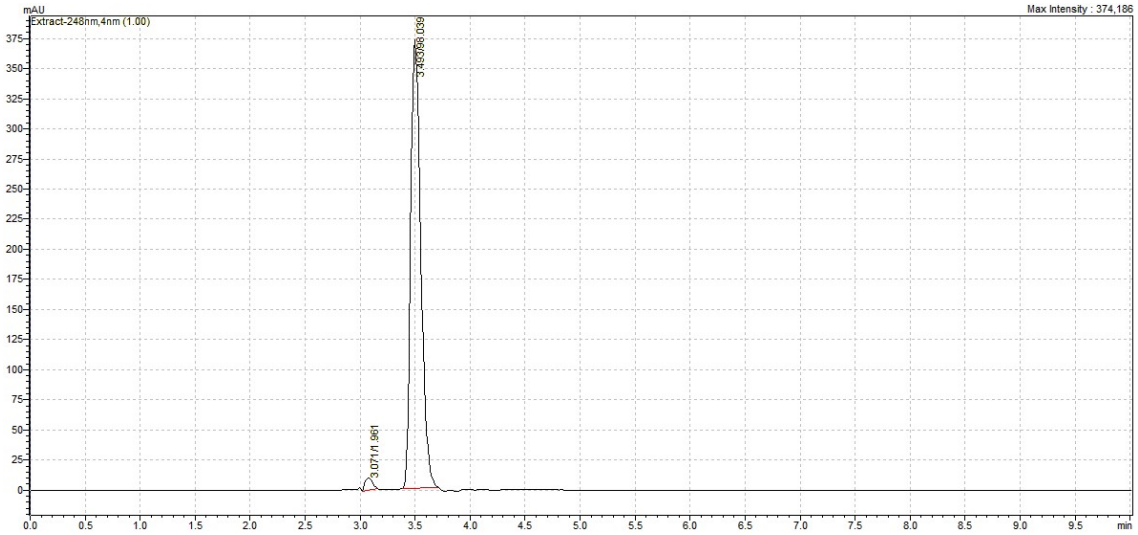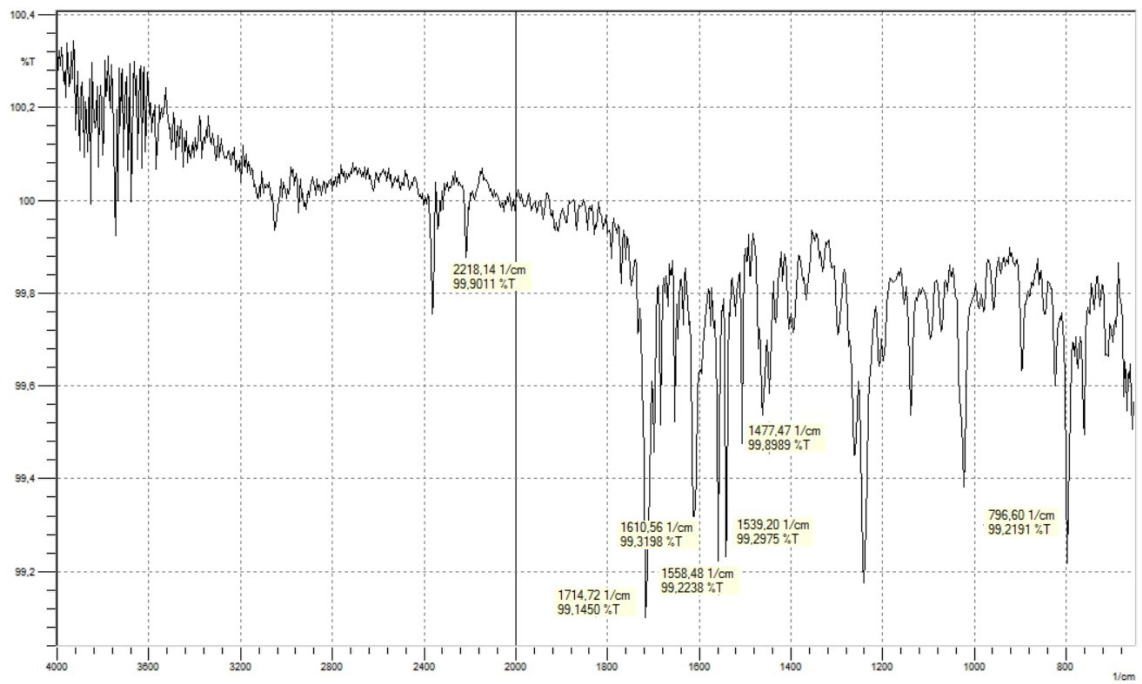

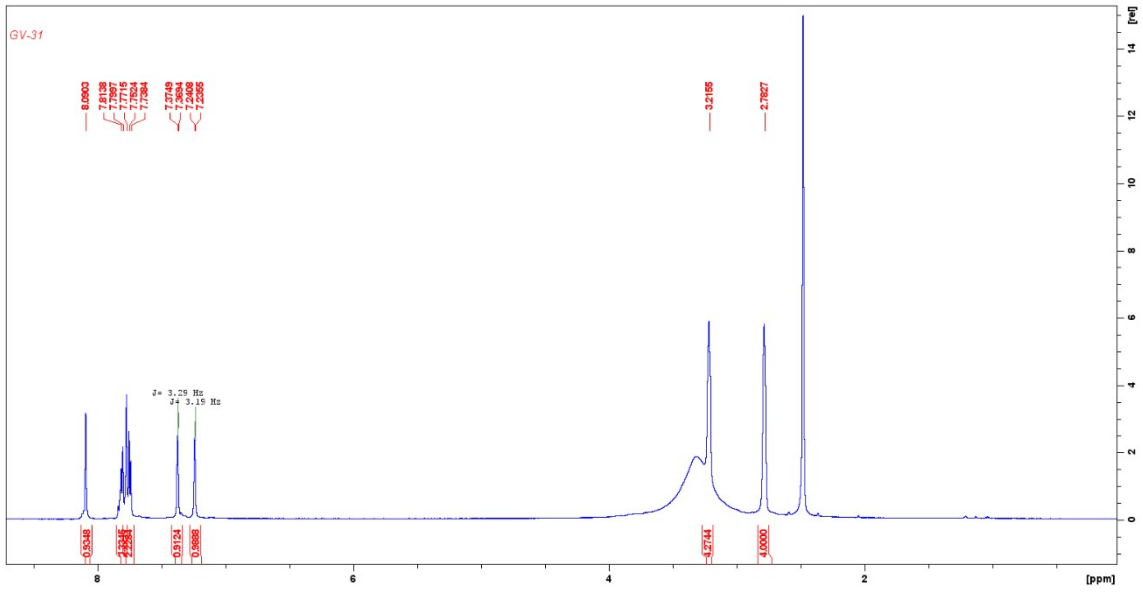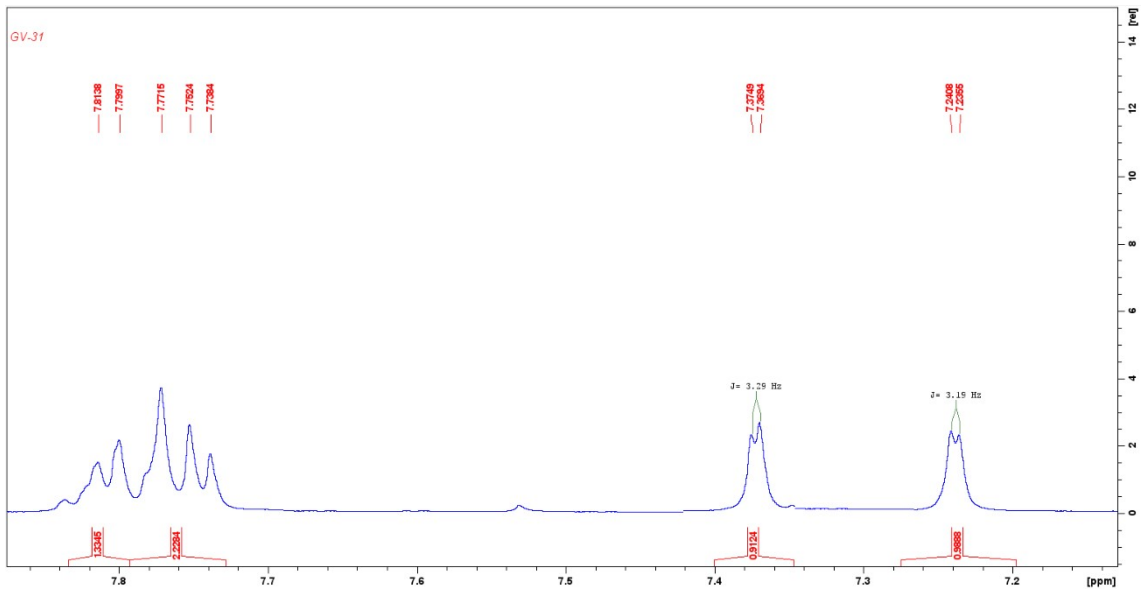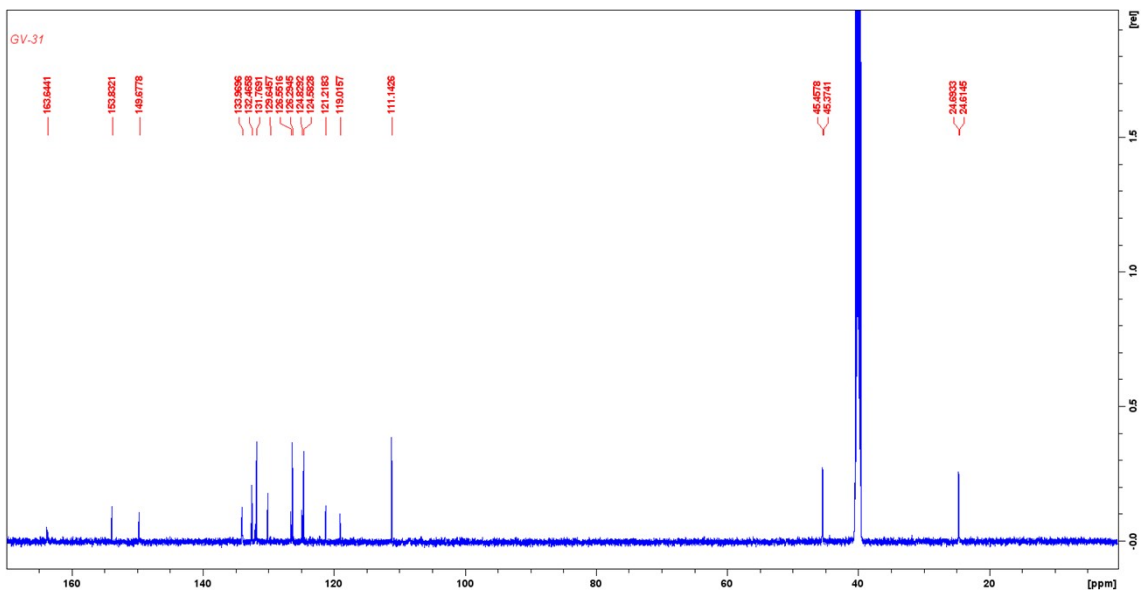



Line#:1 R.Time:27.600(Scan#:2713)  
MassPeaks:178  
RawMode:Averaged 27.592-27.608(2712-2714) BasePeak:290(36902)  
BG Mode:Calc. from Peak Group 1 - Event 1 Scan

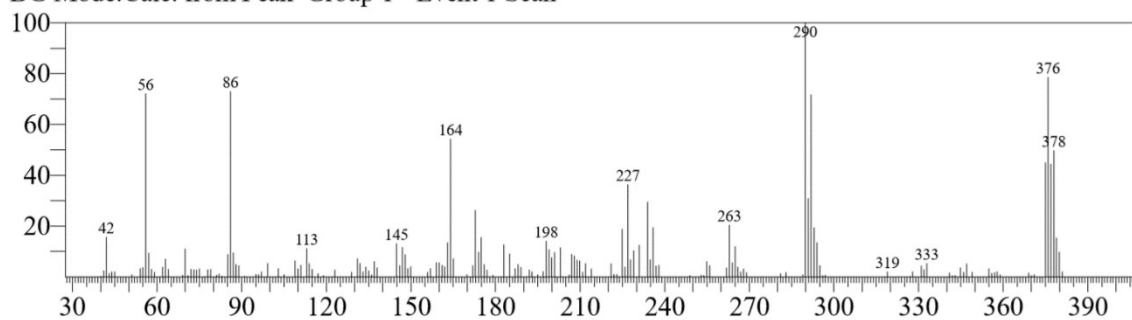

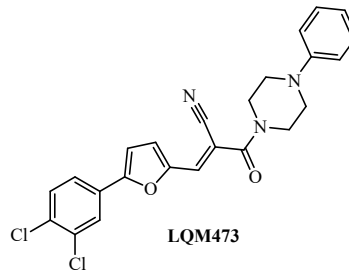

(E)-3-(5-(3,4-Dichlorophenyl)furan-2-yl)-2-(4-phenylpiperazine-1-carbonyl)acrylonitrile  
 Chemical Formula:  $C_{24}H_{19}Cl_2N_3O_2$   
 Exact Mass: 452.34 g/mol

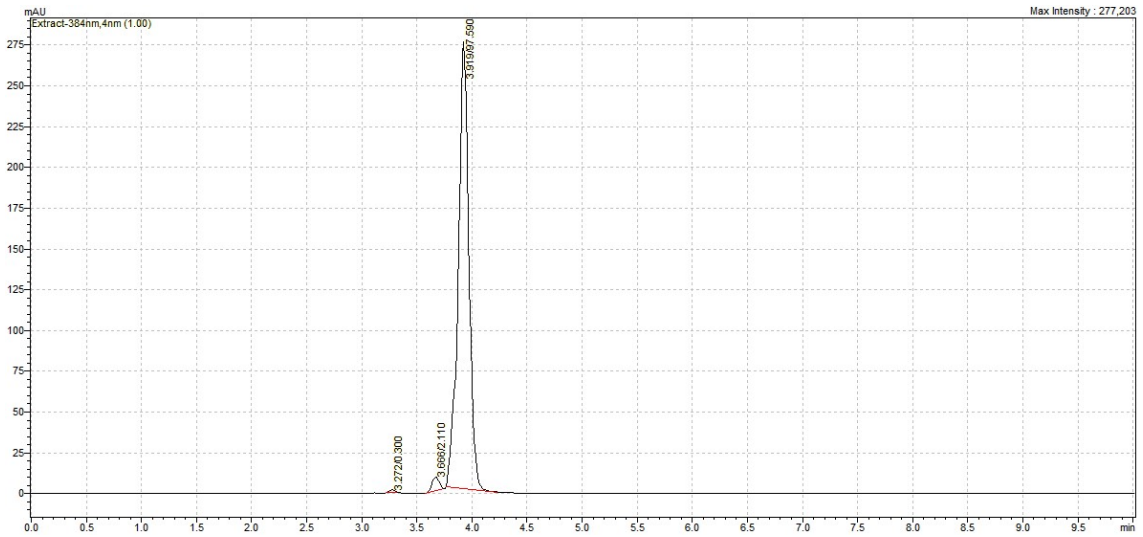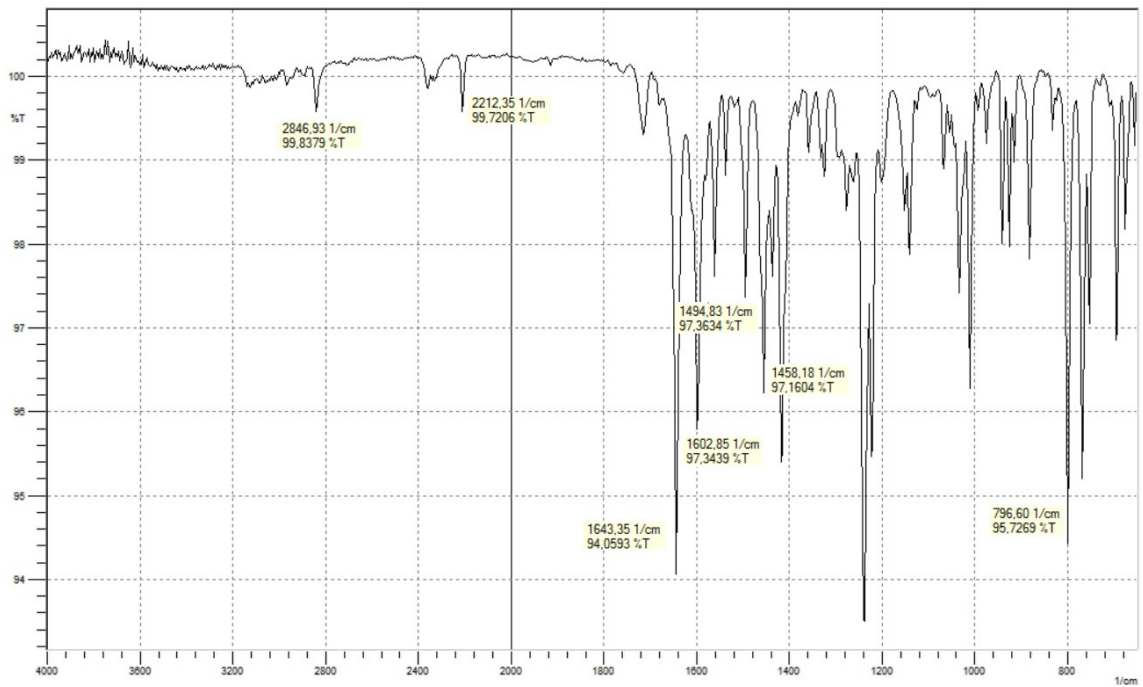

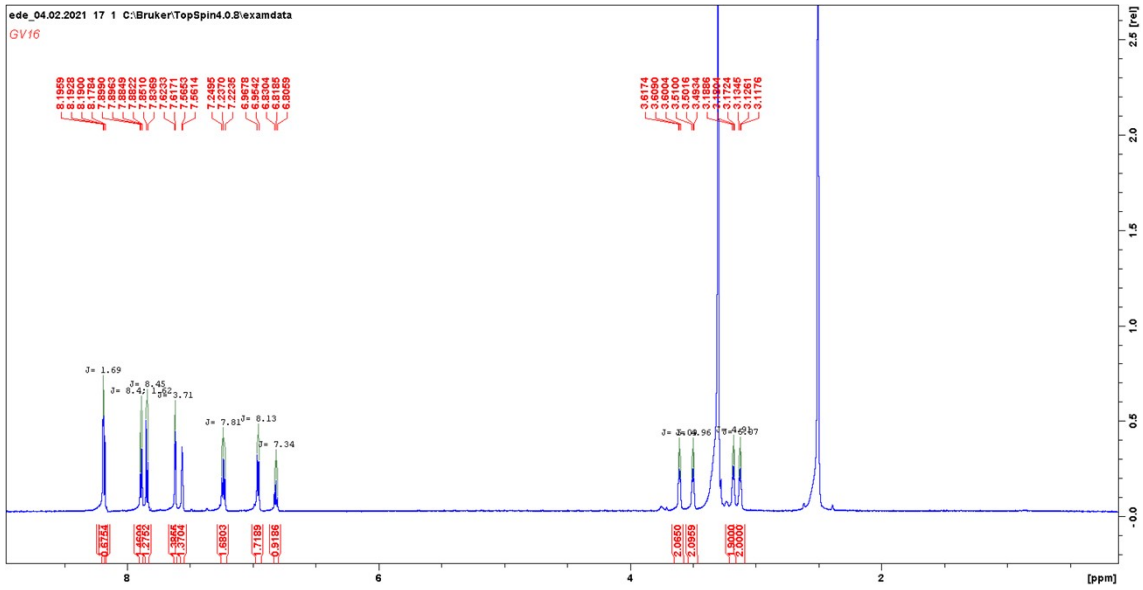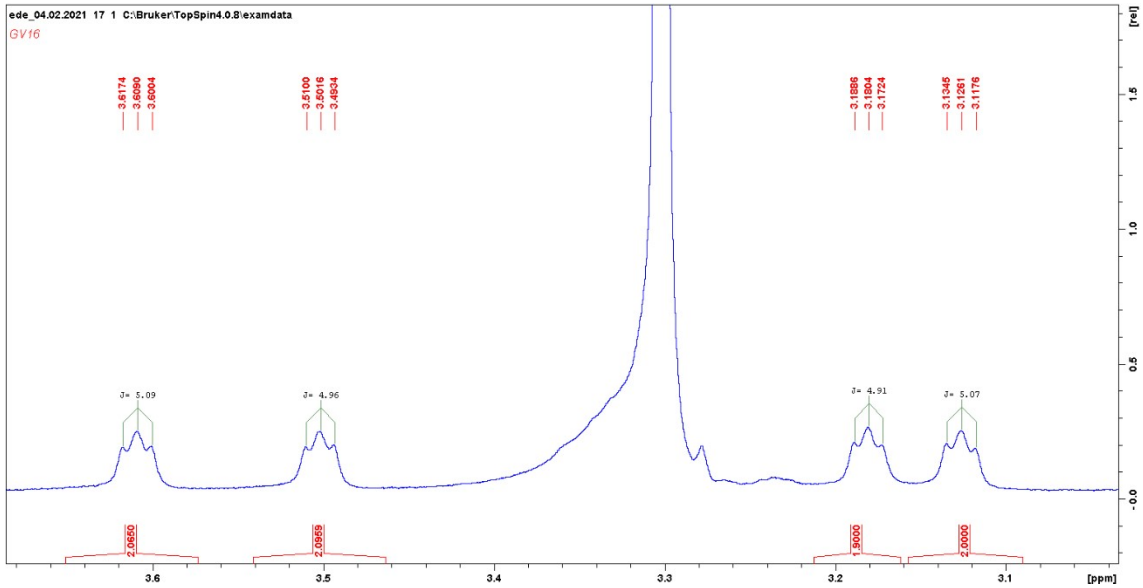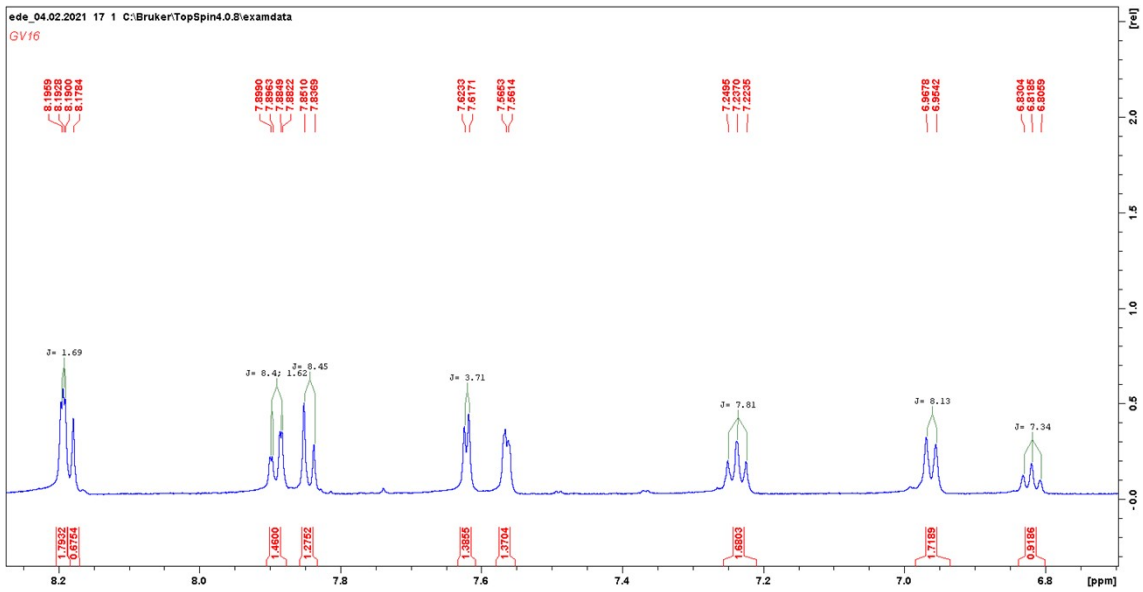

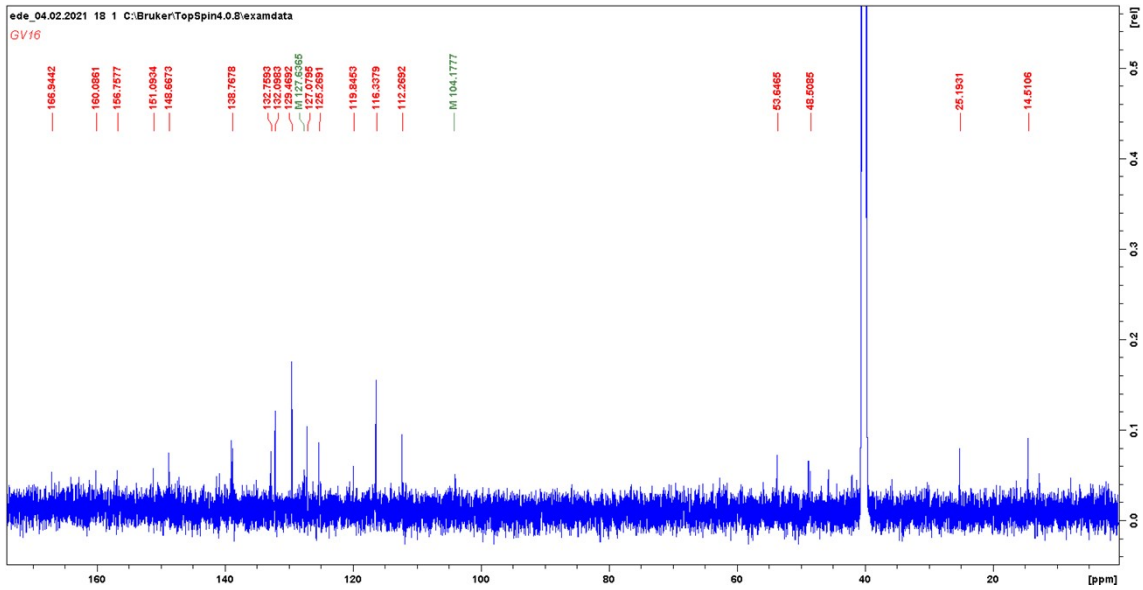

Line#:1 R.Time:23.875(Scan#:2266)  
MassPeaks:97  
RawMode:Averaged 23.650-24.025(2239-2284) BasePeak:132(29496)  
BG Mode:Averaged 23.142-23.200(2178-2185) Group 1 - Event 1 Scan

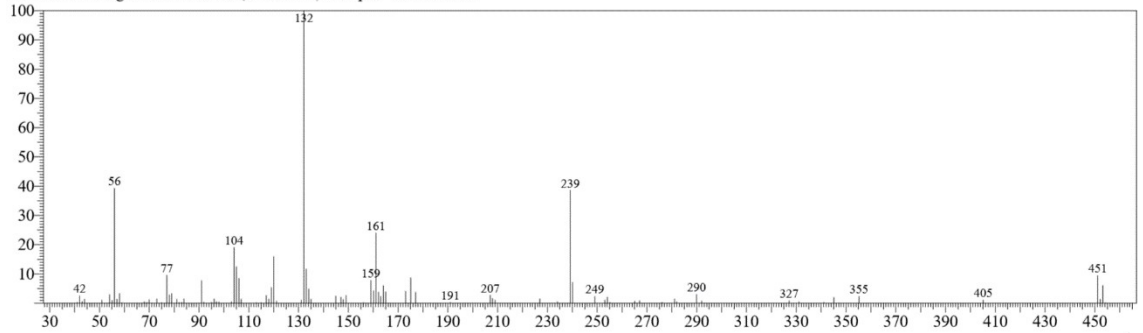

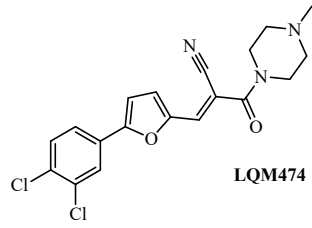

(E)-3-(5-(3,4-dichlorophenyl)furan-2-yl)-2-(4-methylpiperazine-1-carbonyl)acrylonitrile  
 Chemical Formula: C<sub>19</sub>H<sub>17</sub>Cl<sub>2</sub>N<sub>3</sub>O<sub>2</sub>  
 Exact Mass: 389.26 g/mol

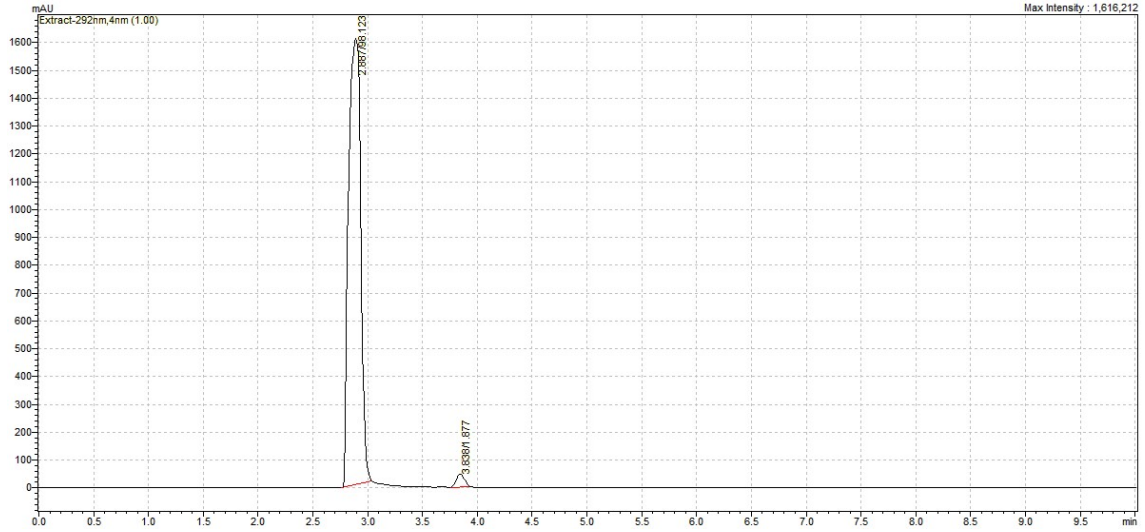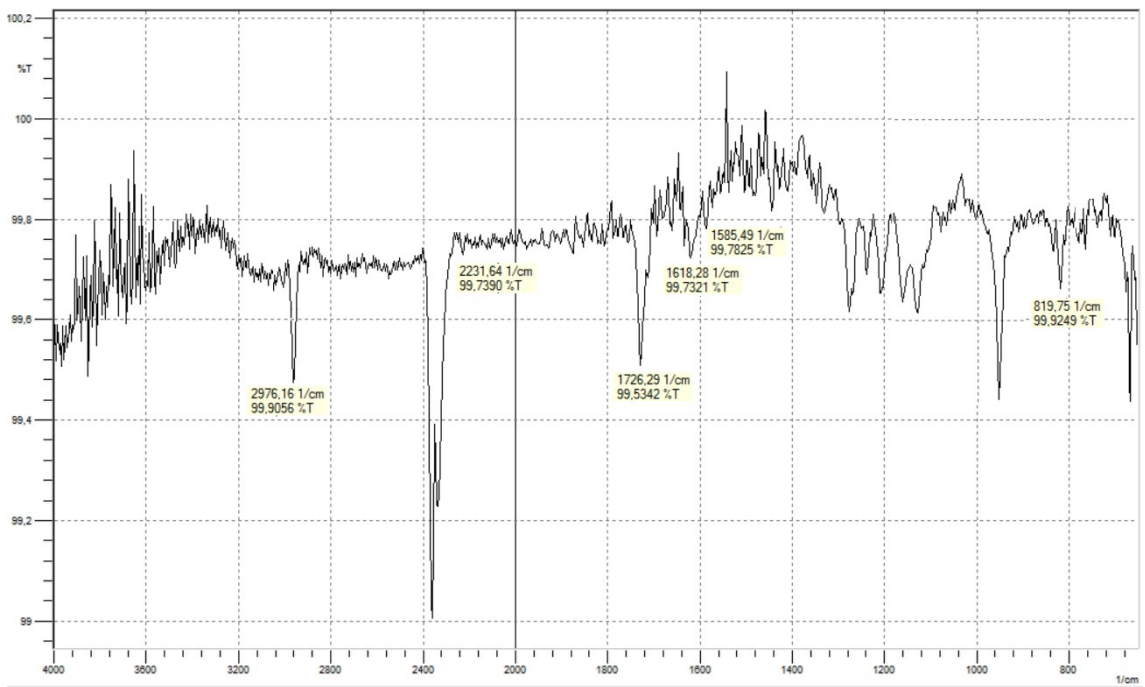

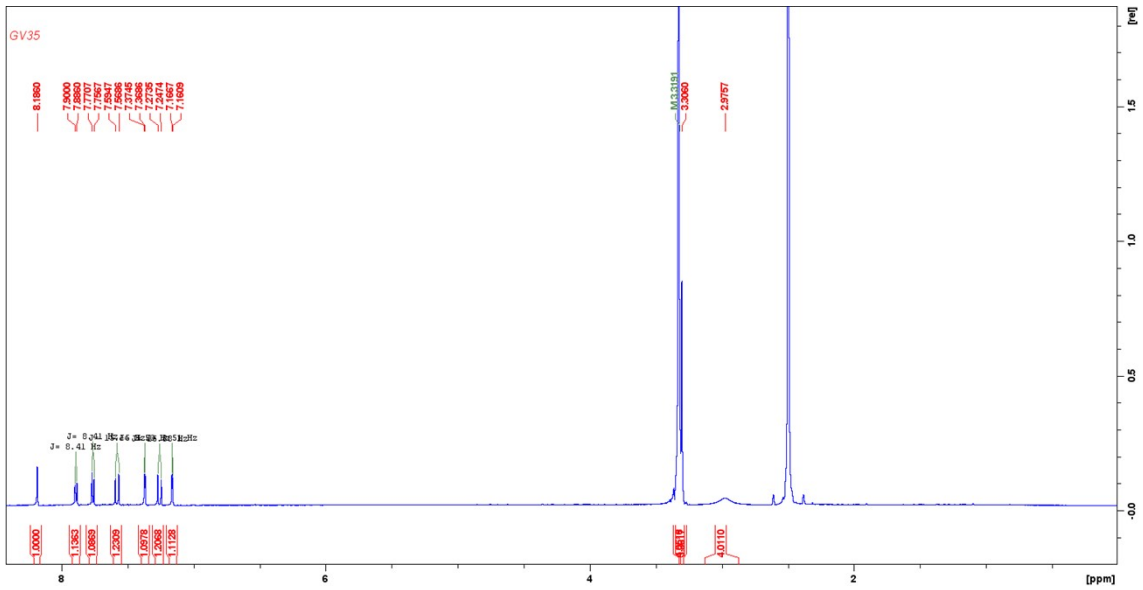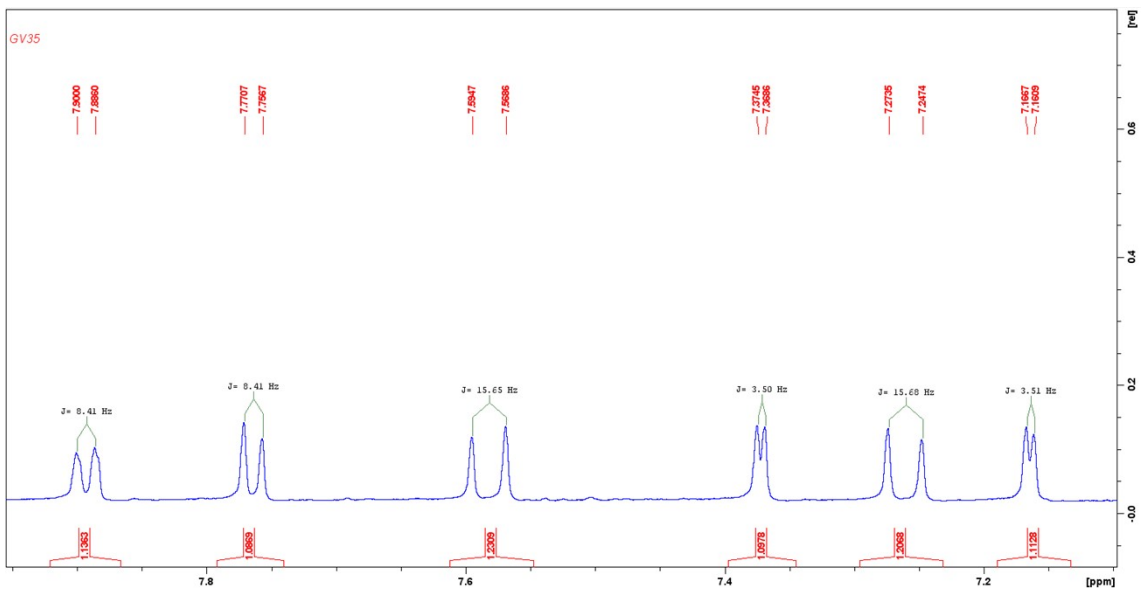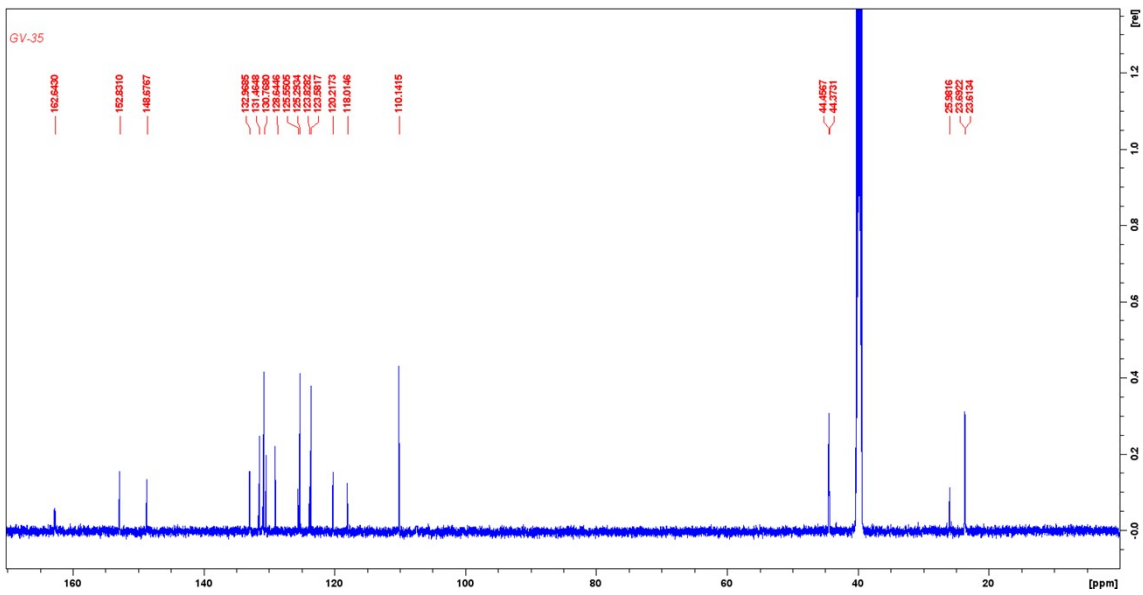

Line#:1 R.Time:18.908(Scan#:1670)

MassPeaks:384

RawMode:Averaged 18.842-18.925(1662-1672) BasePeak:385(3345951)

BG Mode:Averaged 19.000-19.008(1681-1682) Group 1 - Event 1 Scan

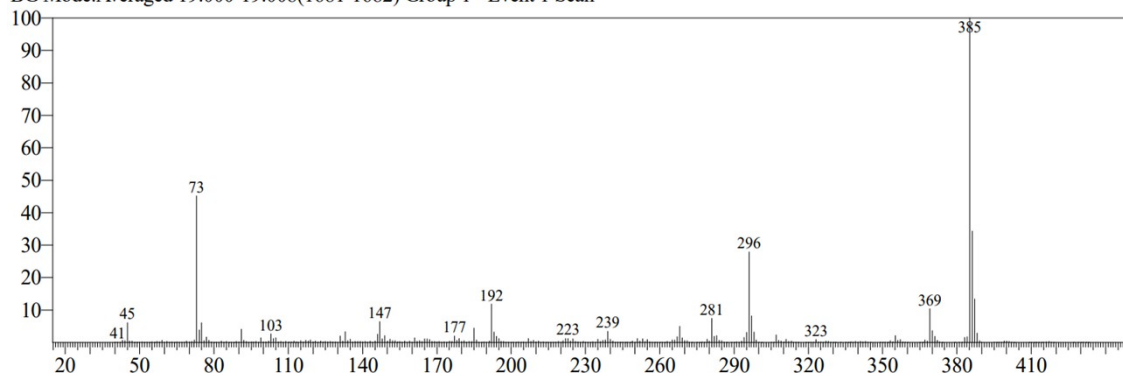

Supplement: d2nj01983c1.pdf [file d2nj01983c1.pdf]
